# Supplementary material for: Trends Supporting the In-Field Use of Wearable Inertial Sensors for Sport Performance Evaluation: A Systematic Review
Source: Sensors (Basel). 2018 Mar 15;18(3):873. doi: 10.3390/s18030873 (PMC5877384; doi:10.3390/s18030873)
Supplement: Supplementary file 1 [file sensors-18-00873-s001.xlsx]

## Sheet: 286 papers
AUTHORS	TITLE	DOI	YEAR	JOURNAL	SPORT	MOTOR TASK	AIMS	PARTICIPANTS		SETTING	PARAMETERS		DEVICE/S								PERFORMANCE EVIDENCE/CONCLUSIONS
								WHO	HOW MANY		CONTACT TIMES	OTHERS	TYPE	BRAND	CHARACTERISTICS	SAMP FREQ [samples/s]	NUMBER OF UNITS	POSITION	FIXING TECHNIQUE	OTHER SENSORS
Ahmadi A, Mitchell E, Richter C, Destelle F, Gowing M, O’Connor NE, Moran K	Towards automatic activity classification and movement assessment during a sports training session	10.1109/JIOT.2014.2377238	2013	IEEE Internet of Things Journal	human activity: sprinting, jogging, walking, jumping, agility cut, kicking	each motion lasted approximately 60 seconds for a total of approximately 9-10 minutes for the entire session.	to utilize wearable inertial sensors and develop a method to: a. automatically and accurately categorize each foot-ground contact based on the type of movement (i.e.walk, jog, sprint, jump, land, agility cut); b. extract joint angle and impact acceleration data automatically for each foot contact cycle; c. generate normative data; for joint angle data using a functional data approach, for impact …	a. healthy subjects b. injured subjects with low back pain	a. 9 b. 1 (gender NS)	laboratory	foot-ground contact based on the type of movement (walking, running)	joint kinematics, to be used also for classification pourposes	3D accelerometer 3D gyroscope	NS	NS	NS	6B	on the left/right shank, left/right thigh and pelvis and sacrum of a subject	double sided tape and velcro straps	#	the presented framework has significant potential for monitoring athletes throughout training and competition to (a) identify injury and performance related determining factors, (b) identify individuals early in an injury pathway prior to extensive tissue damage, and (c) identify individuals predisposed to injury because of their movement technique
Ahmadi A, Rowlands D, James DA	Development of inertial and novel marker-based techniques and analysis for upper arm rotational velocity measurements in tennis	10.1007/s12283-010-0044-1	2010	Sports Engineering	tennis	serve	to measure upper arm rotation angle and remove body artifacts using a network of two inertial sensors on the upper arm and the chest	NS	1 (gender NS)	NS	#	upper arm rotation angle, chest to arm relative angular velocity	3D accelerometer 1D gyroscope	custom-made KXM52-1050 (Kionix) custom-made ADXRS300 (Analog Devices)	mass = 22g; dimensions = 52 x 34 x 12 mm^3; range = ± 2g	100	2B	chest (aligned vertical line from head to feet); upper arm (aligned longitudinal axis of upper arm)	NS	#	#
Ahmadi A, Rowlands D, James DA	Towards a wearable device for skill assessment and skill acquisition of a tennis player during the first serve	10.1002/jst.112	2009	Sports Technology	tennis	serve	a. to assess the skill (how athletes can be assessed with respect to the peak values of their main contributors) b. to provide feedback to athletes and let them compare their serves with elite to improve their swings c. to tst if simulated gyroscopes are capable of assessing skills and acquire high-speed serves	recreational sub-elite elite	1M 2M 1M	laboratory	#	upper arm internal rotation, wrist flexion, and shoulder rotation, forward racquet head speed	3D accelerometer 1D gyroscope	custom-made KXM52-1050 (Kionix) custom-made ADXRS300 (Analog Devices)	mass = 22g; dimensions = 52 x 34 x 12 mm^3; range = ± 2g	100	3B	chest; upper arm; wrist	double-sided tape	#	Correlation between the maximum peak of upper arm internal rotation, wrist flexion, shoulder rotation and racquet head speed, and skill level
Akins JS, Heebner NR, Lovalekar M, Sell TC	Reliability and validity of instrumented soccer equipment	0.1123/jab.2014-0191	2015	Journal of Applied Biomechanics	soccer	drop landing, drop jump, stop jump, jump header, moving header	to assess reliability and validity of a kinematic assessment using instrumented soccer equipment during athletic maneuvers in the laboratory and field	recreational	12M	laboratory	#	plantar flexion, inversion, and internal rotation angles	3D accelerometer 3D gyroscope 3D magnetometer	x-IMU (x-io Technologies)	range = ± 8g; range = ± 2000 deg/s; range = ± 810mT	256	2E	in the turf shoe and shin guard	installed in a custom housing	#	#
Alexander JP, Hopkinson TL, Wundersitz DW, Serpell BG, Mara JK, Ball NB.	Validity of a wearable accelerometer device to measure average acceleration values during high-speed running	10.1519/JSC.0000000000001396	2016	Journal of Strength and Conditioning Research	running (sprint running)	3X40m maximal sprint effort (5min recovery)	to determine the validity of an accelerometer to measure average acceleration values during high-speed running	elite rugby union	13M	in field	#	average acceleration, average velocity	3D accelerometer	SPI-HPU, (GPSports)	mass = 66g; dimensions = 74 x 42 x 16mm^3; range = ±16g	100	1B	slightly superior to the scapulare against the spine	custom made vest	multiple stationary machin vision cameras	the accelerometer could not measure average acceleration values during high speed running. The accelerometer significantly overestimated average acceleration values during both 0 m – 10 m and 10 m – 20 m, regardless of the data filtering technique (p < 0.001). Body mass significantly affected all accelerometer variables. Body mass and the absence of a gravity compensation formula affect the accur…
Ammann R, Taube W, Wyss T	Accuracy of PARTwear inertial sensor and Optojump optical measurement system for measuring ground contact time during running	10.1519/JSC.0000000000001299	2016	Journal of Strength and Conditioning Research	running	sprint running at three different speeds	to validate the detection of ground contact time during running obtained with an IMU worn on the shoe laces and an Optojump with respect to a high speed videocamera	professional	7M, 5F	in field	contact time	#	3D accelerometer 3D gyroscope 3D magnetometer	PARTwear (HuCE-microLab)	mass = 13g; dimensions = 38 x 37 x 8mm^3; range = ±16g	1000	2B	lace of the both shoes	elastic straps	Optojump (Microgate, Italy)	the PW proved to be a highly useful and valid application, and its use can be recommended not only for laboratory settings but also for field applications. In contrast, data on GCT obtained by OJ during running must be treated with caution, specifically when running speed changes or when comparisons are made with GCT data collected by other measurement systems
Anderson R, Harrison A, Lyons GM	Accelerometry-based feedback - Can it improve movement consistency and performance in rowing?	10.1080/14763140508522862	2005	Sports Biomechanics	rowing	rowing on ergometer	to determine if real-time visual ipsative (comparison with oneself) feedback of instantaneous kinematic consistency improves overall kinematic consistency in rowing	elite	13M	laboratory	#	power stroke dispersion based on horizontal hip and shoulder acceleration	2D accelerometer	custom-made ADXL202 (Analog Devices)	NS	250	2B, 1E	seat (hip), shoulder (acromion process), shaft encoder	insulating tape (flywheel cage), glue (acromion process), movement of the seat representative of hip.	#	#
Andrew DPS, Chow JW, Knudson DV, Tillman MD	Effect of ball size on player reaction and racket acceleration during the tennis volley	10.1016/s1440-2440(03)80013-0	2003	Journal of Science and Medicine in Sport	tennis	volley	to examine the effect of ball size on reaction time, movement time, mean rectified acceleration and vibration frequency of the racket during the impact phase of the tennis volley	recreational	20M, 9F	in field	#	shock event identification, magnitude of racket shock and vibration, frequency of vibration	1D accelerometer	custom-made 3115A (Dytran Instruments)	NS	1000	1E	aligned perpendicular to face of racket head, at the racket throat	with a low-mass aluminium brace	#	no effects of ball type on reaction time, significant results only for movement time vs ball speed and type
Atkinson M, Rosalie S, Netto K	Physical demand of seven closed agility drills.	10.1080/14763141.2016.1179781	2016	Sports Biomechanics	contact sports	7 agility drills	to quantify the physical demands of seven generic, closed agility drills that encompass the movements synonymous with agility in focus target and open target invasion sports.	1yr participating in invasion sports	20M	in field	completion time	peak velocity, total foot contacts, peak impacts	3D accelerometer	SPI Pro (GPSports)	NS	100	1B	between the participants’ scapulae	worn in a purpose built supportive harness provided by the manufacturer	GPS 5 Hz	this study provides an evidence-based approach for practitioners to systematically prescribe agility training in a progressive manner
Auvinet B, Gloria E, Renault G, Barrey E	Runner's stride analysis: comparison of kinematic and kinetic analyses under field conditions	10.1016/S0765-1597(02)00122-3	2002	Science and Sports	running (distance running)	track running test over 30m (constant speed close to the athlete’s anaerobic threshold, ~5m/s)	to identify the specific events in the gait cycle of a runner on the cranial–caudal, anterior–posterior and median–lateral acceleration curves	top level resistance runners	7M	in field	heel strike, toe off	#	3D accelerometer	Locométrix	NS	100	1B	medial lumbar region	onto a semi-elastic belt, fastened around the waist, sensor pressed onto the medial lumbar region	#	#
Avvenuti M, Cesarini D, Cimino MGCA	MARS, a multi-agent system for assessing rowers' coordination via motion-based stigmergy	10.3390/s130912218	2013	Sensors	rowing	training and race analysis	to propose a solving approach and the initial experimental setting to have a system that monitors and represents the crew coordination in rowing	novice intermediate	1 3 (gender NS)	in field	#	visual and auditory feedback on rowers asymmetry	3D accelerometer	Shimmer	dimensions = 53 x 32 x 25mm^3	NS	1E	on the inboard segment of the oar, between the handle bottom and the oarlock	clip around the oar	#	a system that monitors and represents the crew coordination would be of great help to the coach during training sessions.
Bächlin M, Tröster G	Swimming performance and technique evaluation with wearable acceleration sensors	10.1013/j.pmcj.2011.05.003	2012	Pervasive and Mobile Computing	swimming	front crawl (one lane seven times, 2min cycle with increasing and decreasing speed)	to propose a wearable computing system (SwimMaster) to support swimmer by monitoring their swimming performance and technique, the results of evaluation studies were presented	elite recreational occasional	7 8 3 (gender NS)	in field	arm strokes	distance per arm stroke, swim velocity, body balance, body rotation	3D accelerometer	SwimMaster (ETH zurich)	mass = 34g; dimensions = 36 x 42 x 12 mm^3; resolution = 10 bit	256	4B	wrists, upper and lower back	wrist: velcro fasteners; lower back: elastic stretch band; upper back: elastic bands combined to a harness shrink-wrapping in plastic foil for waterproof	wrist: velcro fasteners; lower back: elast	the authors built a system for swimming performance and technique analysis, developing algorithms to extract important parameters for swimming. The authors developed a Swim Model for a detailed analysis of the measured body acceleration and an evaluation of our body-rotation and body-balance measurement. With studies on 18 swimmers we showed that our system can extract the parameters
Balsalobre-Fernández C, Kuzdub M, Poveda-Ortiz P, del Campo-Vecino J	Validity and reliability of the push wearable device to measure movement velocity during the back squat exercise	10.1519/JSC.0000000000001284	2016	Journal of Strength and Conditioning Research	overload training	3 repetitions of the back squat exercise with 5 different loads ranging from 25 to 85% 1RM on a Smith Machine	to analyze the validity and reliability of a smartphone-based wearable device to measure movement velocity during the barbell back squat exercise	sport science students min. 1 year barbell squat experience	10M	laboratory	#	mean and peak barbell velocity during the concentric phase	3D accelerometer 3D gyroscope	PUSH	NS	200	1B	on the subject’s dominant forearm, with the hand supinated, in top of the ulna, 1–2 cm distal to the elbow, and with the main button located proximally	using a band	#	the PUSH band is an easy to use, affordable, smartphonebased system that has been demonstrated to be highly valid and reliable in comparison with a professional linear velocity transducer for the measurement of movement back squat velocity, although with a systematic bias. Therefore, it should not be used interchangeably with linear transducers
Balsalobre-Fernández C, Tejero-González CM, del Campo-Vecino J, Alonso-Curiel D	The effects of a maximal power training cycle on the strength, maximum power, vertical jump height and acceleration of high-level 400-meter hurdlers	10.2478/hukin-2013-0012	2013	Journal of Human Kinetics	overload training	jump squat (40% 1RM + 5% until max power)	to assess effect of power training on maximum strenght and power, vertical jump height and acceleration (only maximum power from IMU)	high level, with national/ international experience	7M	in field	#	maximum power	3D accelerometer	MyoTest Pro (Myotest)	NS	NS	1B	barbell, next to the hand	clip	#	#
Barrett S, Midgley A, Lovell R	PlayerLoad™: reliability, convergent validity, and influence of unit position during treadmill running	10.1123/ijspp.2013-0418	2014	International Journal of Sports Physiology and Performance	running (distance running)	incremental treadmill running tests (7-16 km/h), all tests are separate by 7 days. After a 5 minute warm-up at a self-selected pace on an exercise bike, participants then performed an incremental treadmill test, starting at a speed of 7 km/h, on an incline of 1% gradient.23 After 4 minutes of running at 7 km/h to accustom the participant with the experimental configuration, the treadmill speed wa…	to establish the test–retest reliability of triaxial-accelerometer data during a standardized bout of treadmill running, examine the effect of accelerometer location on PlayerLoad data, and investigate the convergent validity of PlayerLoad using heart rate and rate of pulmonary oxygen uptake (VO2) as criterion measures of exercise intensity	44 team-sport players: semiprofessional, university-level	12 32 (gender NS)	laboratory	#	vector magnitude of PlayerLoad (3D jerk) and the vectors in individual axis	3D accelerometer	Minimax S4 (Catapult)	NS	100	2B	1 between the scapulae and 1 at the intersection of the axial and sagittal planes in line with the iliac crest on the posterior side of the body	in a neoprene undergarment that accommodates the unit in an integrated pouch	heart rate and gas analysis	PlayerLoad measured from triaxial accelerometers in GPS devices can be used reliably to examine differences in individual athletes’ external loading
Barrett S, Midgley A, Towlson C, Garrett A, Portas M, Lovell R	Within-match Playerload™ patterns during a simulated soccer match: potential implications for unit positioning and fatigue management	10.1123/ijspp.2014-0582	2016	International Journal of Sports Physiology and Performance	soccer	two 45-minute halves (a fixed 15-min activity profile repeated 3 times in each half)	a. to assess the acute alterations in triaxial accelerometry (PlayerLoad) and its individual axial planes (anteroposterior, mediolateral and vertical) during a standardized soccer match-play simulation b. to assess the test–retest reliability and anatomical location of the devices	university semi-professional	15 5 (gender NS)	in field	#	Player Load calculated as the square root of the sum of the squared instantaneous rates of change in acceleration in each of the 3 planes	3D accelerometer	MinimaxX S4 (Catapult)	NS	100	2B	one between the scapulae and another close to the Center-of-mass	in a neoprene undergarment	#	PlayerLoad variables have moderate to high test–retest reliability and can be used to monitor athletes’ external loading during intermittent and multidirectional running. Real-time monitoring of accelerometer data recorded at the COM identifies increases in loading possibly owing to fatigue or altered movement strategy, which may be used to inform external-load prescription or interchange/substit…
Beanland E, Main LC, Aisbett B, Gastin P, Netto K	Validation of GPS and accelerometer technology in swimming	10.1016/j.jsams.2013.04.007	2014	Journal of Science and Medicine in Sport	swimming	3 x 100m (1 butterfly, breaststroke, freestyle)	to evaluate the validity of an integrated accelerometer and GPS device to quantify swimming kinematics variables in swimming	sub-elite	12M, 9F	in field	stroke count	#	3D accelerometer	Minimax S4 (Catapult)	NS	100	1B	head, vertical axis of the acc directly inferior to the inion, in line with the sagittal suture	a second swimming cap was placed over the device	GPS 10 Hz	valid and accurate tool for stroke count quantification in breaststroke and butterfly, as well as measuring mid-pool swimming velocity in freestyle and breaststroke
Bergamini E, Guillon P, Camomilla V, Pillet H, Skalli W, Cappozzo A	Trunk inclination estimate during the sprint start using an inertial measurement unit: a validation study	10.1123/jab.29.5.622	2013	Journal of Applied Biomechanics	running (sprint running)	sprint start	to validate the use of a trunk-mounted inertial measurement unit (IMU) in estimating the trunk inclination and angular velocity in the sagittal plane during the sprint start (a custom made Kalman filter was used to obtain the IMU inclination)	college level	5M	laboratory	#	trunk inclination, peak trunk angular velocity	3D accelerometer 1D gyroscope	FreeSense (Sensorize)	range = ± 6g; range = ±500deg/s	100	1B	lower back trunk (L2)	an ad-hoc elastic belt	#	#
Bergamini E, Morelli F, Marchetti F, Vannozzi G, Polidori L, Paradisi F, Traballesi M, Cappozzo A, Delussu AS	Wheelchair propulsion biomechanics in junior basketball players: a method for the evaluation of the efficacy of a specific training program	10.1155/2015/275965	2015	Biomed Research International	wheelchair basketball	20 m sprint test	a. to propose a method based on inertial sensing technologies aimed at obtaining a set of biomechanical parameters able to provide performance-related information about in-the-field wheelchair propulsion b. to develop a discipline- and population-specific training program for junior wheelchair basketball athletes and to assess its efficacy using the proposed biomechanical parameters	recreational (2 to 7 years experience)	10M, 2F	in field	push cycle duration, push cycle frequency	progression force, bylateral symmetry, intercycle variability	3D accelerometer	Opal (Apdm)	range = ±6g	128	2B, 1E	right and left wrists, backrest of the wheelchair	elastic bands for the wrists and double-sided tape for the wheelchair backrest	arm crank ergometer	better performances on 20 m sprint test are related to the ability of the athletes to generate high power with the upper arms as well as to increase the push frequency (thus decreasing the push cycle duration) and the push symmetry between the right and left arms during propulsion
Bergamini E, Picerno P, Pillet H, Natta F, Thoreux P, Camomilla V	Estimation of temporal parameters during sprint running using a trunk-mounted inertial measurement unit	10.1016/j.jbiomech.2011.12.020	2012	Journal of Biomechanics	running (sprint running)	maximal sprint runs on tracks	to identify consistent features in the signals supplied by a single inertial measurement unit (IMU) or thereof derived, for the identification of foot-strike and foot-off instants of time and for estimation of stance and stride duration during the maintenance phase of sprint running	a. ameteur b. elite	4M, 2F 3M, 2F	in field	heel strike, toe off, stance and stride duration	#	3D accelerometer 1D gyroscope	FreeSense (Sensorize)	range = ±6g; range = ±500deg/s	200	1B	lower back trunk (L1)	an ad-hoc elastic belt	#	the potential to provide reliable estimates of temporal parameters during in field training sessions
Bigelow EMR, Elvin NG, Elvin AA, Arnoczky SP	Peak impact accelerations during track and treadmill running	10.1123/jab.29.5.639	2013	Journal of Applied Biomechanics	running (distance running)	subjects ran 4 miles on an indoor track at a selfselected, long-distance training pace + 7 days later subjects run 4 miles on a treadmill (track average pace)	to describe a novel accelerometer, and to use this accelerometer to compare peak vertical and peak horizontal impact accelerations in a group of subjects running on an indoor track and a treadmill	healthy and physically active	20 (gender NS)	in field	#	peak impacts for every quarter mile of the 4 mile track and treadmill test	3D accelerometer	ZeroPoint Technology	mass = 50g; range = ±18g; resolution = 10 bit; battery = 4h	1000	1B	L5 vertebra	a pair of tight-fitting triathlon belts attached to a custom-made acrylic plate	#	no significant difference in peak vertical impact acceleration between track and treadmill running VS significant differences in horizontal peak acceleration
Boyd LJ, Ball K, Aughey RJ	Quantifying external load in Australian football matches and training using accelerometers	10.1123/ijspp.8.1.44	2013	International Journal of Sports Physiology and Performance	Australian football	matches and training	to quantify external load during matches and training for different roles and levels	elite sub-elite	19M 21M	competition	#	PlayerLoad (3D jerk)	3D accelerometer 3D gyroscope 3D magnetometer	MinimaxX S2 (Catapult)	mass = 67g; dimensions = 88 x 50 x 19mm^3; range = ±6g; temperature range -40°C to 85°C. power supply 5h @ 100Hz	100	1B	the posterior side of the upper torso	customized vest designed to minimize movement between the device and the body	2 GPS systems 2 foot scan insole system	1. acceleration detected differences in external load between activities (training vs matches), playing positions, elite-subelite competition 2. acceleration may provide a supplementary measure of low-velocity external load that may underestimated by current time-motion-analysis methods 3. SSG were the only training drill to provide sufficient external loads compared with matches for all playing …
Boyd LJ, Ball K, Aughey RJ	The reliability of MInimaxX Accelerometers for measuring physical activity in Australian football	10.1123/ijspp.6.3.311	2011	International Journal of Sports Physiology and Performance	Australian football	Australian football league matches	to assess the reliability of triaxial accelerometers as a measure of physical activity in team sports	semiprofessional	10M	competition	#	accelerometer outputs	3D accelerometer	MinimaxX 2.0 (Catapult)	mass = 67g; dimensions = 88 x 50 x 19mm^3; range = ±6g; temperature range -40°C to 85°C. power supply 5 h @ 100 Hz	100	1B	on the posterior side of the upper torso	costum vest	GPS 5 Hz	The MinimaxX accelerometers can be confidently applied to assess changes or differences over multiple periods of activity. Although low, the variation displayed should be taken into account when making inferences about the meaningfulness of differences.
Brodie M, Walmsley A, Page W	Fusion motion capture: a prototype system using inertial measurement units and GPS for the biomechanical analysis of ski racing	10.1002/jst.6	2008	Sports Technology	alpine skiing	5 runs through a 10-gate giant slalom	to develop a fusion motion capture (FMC) technology in order to capture 3-D kinetics and kinematics of alpine ski racing	elite (New Zealand national team)	1M	in field	run and split times	limb orientation, global trajectory, ground reaction forces, dissipative forces, residual forces, power and energy	3D accelerometer 3D gyroscope 3D magnetometer	Moven (Xsens)	Kalman filter accuracy provided by Xsens: ±3deg	50	16B	head, torso, pelvis, upper and lower arms, thighs, shanks, ski boots	lycra bodysuit constructed to contain the connecting wires with appertures at the location of each IMU (attached directly to skin using double-sided tape). Each IMU fastened with a firmly fitting elastic strap attached with velcro to the suit. The exact position of each IMU was specific to alpine ski racing as the IMU would be damaged by aggressive racing strategy if they were attached to the out…	2 GPS 1 Hz (GPS SiRFstar2 USB receivers, 1 base station, 1 rover, specified accuracy ±10m RMS in 3-D or Dilution of Precision (DoP) ±5m. Single Frequency) + foot scan insole system (100Hz)	differences over multiple periods of activity, or between players
Brown N, Bichler S, Alt W	Detecting repetitions and time features in resistance training using triaxial accelerometry	10.1080/19346182.2015.1064935	2015	Sports Technology	overload training	bench press, leg press, and trunk flexion	to detect the number of repetitions and different time features in a repetition training session through accelerometry	resistance-training experienced	31M, 19F	in field	repetition count, phase durations, time under tension	#	3D accelerometer 3D gyroscope 3D magnetometer	MTw (Xsens)	NS	50	1B	wrist		#	a detailed and precise description of the training intervention is possible. Thus, reproducibility of studies is achievable; also the objectivity in the interpretation of results is enhanced. For the practitioner, a higher quality of training protocol brings new possibilities in the planning, and adaptation of training processes
Buchheit M, Gray A, Morin JB	Assessing stride variables and vertical stiffness with GPS-embedded accelerometers: preliminary insights for the monitoring of neuromuscular fatigue on the field	#	2015	Journal of Sports Science and Medicine	running	treadmill running	to examine the ability of a GPS-embedded accelerometer to assess stride variables and vertical stiffness during field-based high-intensity runs	team sport player	1M	laboratory	contact time, flight time	vertical stiffness	3D accelerometer	SPI HPU (GPSports)	NS	100	#	#	GPS-vest, as previously described (Aughey, 2011)	GPS	since contact time and vertical stiffness are two important determinants of high-intensity running, new perspectives are opened for the field monitoring of neuromuscular fatigue through the use of prognostic of lower-limb strength asymmetries
Buddhadev H, Vingren JL, Duplanty AA, Hill DW	Mechanisms underlying the reduced performance measures from using equipment with a counterbalance weight system	10.1519/jsc.0b013e318245c0b1	2012	Journal of Strength and Conditioning Research	overload training	bench press throw	to determine the underlying physiological and biomechanical causes of the reduced performance measures found when using a counterbalanced Smith machine	physically active from relatively untrained to very highly trained	24M	in field	#	peak power, peak force, and peak eccentric and concentric velocities	3D accelerometer	Myotest	NS	NS	1E	barbell	attached to the barbell	#	the use of a counterbalance system results in lower accelerometer-based performance measures (barbell peak power, peak force, and peak concentric velocity) for explosive rebound movements and to a slightly lesser degree for explosive concentric-only movements
Buśko K, Staniak Z, Szark-Eckardt M, Nikolaidis PT, Mazur-Różycka J, Łach P, Michalski R, Gajewski J, Górski M	Measuring the force of punches and kicks among combat sport athletes using a modified punching bag with an embedded accelerometer	10.5277/ABB-00304-2015-02	2016	Acta of Bioengineering and Biomechanics	boxing; taekwondo	straight punch; Apdolio and Dwit Chagi kicks	to design a new system to measure punching and kicking forces and reaction time; to examine if there are any intergender differences in the forces	a. elite taekwondo b. professional boxers	a. 14M, 14F b. 13M, 7F	in field	#	strike force, punching location on the bag, time of a strike, acceleration of movement of the punching bag's center of mass, angular acceleration	3D accelerometer	BTS-4AP-2K	NS	1000	2E	On the edge surfaces of the punching bag's inner cylinder base	NS	#	BTS-4AP-2K is sufficiently functional to be used for diagnostics in taekwondo, while at the same time offering great diagnostic capabilities for boxing. Intergender differences occurred in the force of Apdolio and Dwit chagi kicks. In the case of straight punchs intergender differences were noticed only for the rear hand
Callaway AJ	Measuring kinematic variables in front crawl swimming using accelerometers: a validation study	10.3390/s150511363	2015	Sensors	swimming	front crawl at maximal effort (4x25m, 8x25m to induce fatigue, 4x25m)	to calculare Lap Time, Velocity, Stroke Count, Stroke Duration, Stroke Rate and Phases of the Stroke in front crawl swimming using multiple IMUs	national level	6M, 6F	in field	lap time, velocity, stroke count, stroke duration, stroke rate and phases of the stroke	#	3D accelerometer	X6-2mini (Gulf Coast Data Concepts LLC)	mass = 38g; dimensions = 29.5 x 16 x 59mm^3; range = ±16g; resolution = 16 bit	320	6B	Wrist (distal end of the Ulna and Radius), arm (close to the Olecranon Fossa), lower back (L4 in line with the illiac process), upper back (T5)	tape and belt for lower back (from figure)	#	this system demontrates the capabilities of multiple sensor systems in processing multiple variables simultaneously on a swimmer. The developed algorithm required some individual swimmer customization. Single sensor systems (such as sacrum) will not be able to determine or infer the phases of the stroke with sufficient accuracy.
Callaway AJ, Cobb JE	Linear acceleration measurement utilizing inter-instrument synchronization: a comparison between accelerometers and motion-based tracking approaches	10.1080/1091367X.2012.669336	2012	Measurement in Physical Education and Exercise Science	rowing	six full strokes on a rowing ergometer for three times (one for each axis of the accelerometers: X, Y, Z)	a. to determine whether maxima detection is a reliable method for aligning an accelerometer dataset b. to test the inter-instrument reliability of the devices c. to test the validity when compared to video-derived kinematic data (acceleration)	no prior rowing experience	1M	laboratory	#	acceleration peaks and intervals of time	3D accelerometer	X6-2mini (Gulf Coast Data Concepts LLC)	mass = 38g; dimensions = 29.5 x 16 x 59mm^3; range = ±6g; resolution = 16 bit; hermetically sealed	320	2E	rowing ergometer seat	rectangular plate secured to the ergometer seat	#	#
Caruso JF, Olson NM, Taylor ST, Mclagan JR, Shepherd CM, Borgsmiller JA, Mason ML, Riner RR, Gilliland L, Grisewold S	Front squat data reproducibility collected with a triple-axis accelerometer	10.1519/JSC.0b013e31821d5ed7	2012	Journal of Strength and Conditioning Research	overload training	front squat (4 different loads)	to assess reproducibility of data provided by a 3D accelerometer	5 years of american football and at least 2 years of front squat experience	18M	in field	#	force velocity power	3D accelerometer	Myotest	NS	500	1E	barbell	#	#	majority of performance indices exceeded intraclass correlation and CV values previously deemed as acceptable levels of data reproducibility. Higher movement rates at the lightest load were the most difficult aspect of front squat performance
Casartelli N, Müller R, Maffiuletti NA	Validity and reliability of the Myotest accelerometric system for the assessment of vertical jump height	10.1519/JSC.0b013e3181d8595c	2010	Journal of Strength and Conditioning Research	jump tests	squat, countermovement, repeated jump	to assess validity and reliability of the Myotest system	recreational	44M	in field	#	jump height (using time or velocity)	3D accelerometer	Myotest	mass = 58g; dimensions = 54x102x111 mm^3; range = ±8 g	500	1B	waist side	Velcro elastic belt	#	#
Castagna C, Ganzetti M, Ditroilo M, Giovannelli M, Rocchetti A, Manzi V	Concurrent validity of vertical jump performance assessment systems	10.1519/JSC.0b013e31825dbcc5	2013	Journal of Strength and Conditioning Research	jump tests	countermovement and vertical jump	to assess intratrial concurrent validity and measurement agreement of Optojump and Myotest by comparing them to a force platform	regional youth	20M	in field	#	jump height	3D accelerometer	Myotest	mass = 50g; dimensions = 55 x 85 x 23mm^3	500	1B	Third-Fourth lumbar vertebra height	strap belt	#	Optojump and Myotest systems possess convergent validity and can be successfully used under field conditions to assess VJ while performing a CMJ. However, caution should be exercised when interpreting data obtained from different portable systems for field measurement
Chakravorti N, Le Sage T, Slawson SE, Conway PP, West AA	Design and implementation of an integrated performance monitoring tool for swimming to extract stroke information at real time	10.1109/TSMC.2012.2235428	2013	IEEE Transactions on Human-Machine Systems	swimming	all swimming styles	to design and implemt a novel performance analysis tool to measure swimmer performance using wireless technology	NS	2 (gender NS)	in field	stroke rates, stroke counts, lap counts	#	3D accelerometer	NS	NS	NS	1B	Lower back	NS	force plates, pressure pads, high-speed cameras	this paper has addressed issues with application processing and storing of the raw data, application processing and storing of the raw data, application features and derived knowlege on databases hosted on remote computers
Chandler PT, Pinder SJ, Curran JD, Gabbett TJ	Physical demands of training and competition in collegiate netball players	10.1519/JSC.0000000000000486	2014	Journal of Strength and Conditioning Research	netball	4 matches and 15 training sessions	to investigate the physical demands of different modes of netball training and compare these demands with match play	experienced (collegiate-level)	8F	competition	#	PlayerLoad (3D jerk)	3D accelerometer	MinimaxX S4 (Catapult)	NS	100	1B	upper back	small vest	heart rate sensor (Polar)	the physical and movement demands of netball differ among positions, but positions that have the same court restrictions tend to have similar physical and movement demands. This highlights the need for positionspecific conditioning, which may use positional court restrictions to replicate physical demands
Chapman RF, Laymon AS, Wilhite DP, McKenzie JM, Tanner DA, Stager JM	Ground contact time as an indicator of metabolic cost in elite distance runners	10.1249/MSS.0b013e3182400520	2012	Medicine and Science in Sports and Exercise	running (distance running)	30-s running stages on a motorized treadmill	to characterize changes in contact time and selected kinematic variables as a function of speed	elite	12M, 6F	laboratory	ground contact time, swing time, stride frequency	sride length, 1/ground contact time	3D accelerometer	G-Link (MicroStrain)	range = ±10g	1024	2B	attached to the top of each shoe	plastic ties to attach the device to the shoelaces	#	distance and gender differences in tc
Chardonnens J, Favre J, Cuendet F, Gremion G, Aminian K	A system to measure the kinematics during the entire ski jump sequence using inertial sensors	10.1016/j.jbiomech.2012.10.005	2013	Journal of Biomechanics	ski jumping	ski jumping	to develop a method for estimating lower body segment orientation and skiis during jump	elite (junior to World-cup level)	22M	in field	#	ski horizontal and V-opening angle hip, knee and shank-ski angle	3D accelerometer 3D gyroscope	Physilog1 (BioAGM)	mass < 100g (per IMU); range = ±10g; range = ±1200deg/s	500	5B, 2E	sacrum, thigh and shank of both legs, (lateral distal for thigh, frontal distal for shank); skis behind the bindings	underwear suit	#	assessment of key parameters for the lower limbs during the entire jump
Chardonnens J, Favre J, Cuendet F, Gremion G, Aminian K	Characterization of lower-limbs inter-segment coordination during the take-off extension in ski jumping	10.1016/j.humov.2013.01.010	2013	Human Movement Science	ski jumping	ski jumping	a. to characterize the inter-segment coordination of the shank-thigh and thigh-sacrum pairs during the take-off in ski jumping using the continuous relative phase (CRP) b. to describe the relationship between the inter-segment coordination of the lower-limbs and the performance assessed by the jump length	elite junior Continental-cup level World-cup level	20 9 4 (gender NS)	in field	#	orientation of the sacrum, thighs, and shanks, continuous relative phase of shank-thigh, thigh-sacrum	3D accelerometer 3D gyroscope	Physilog1 (BioAGM)	mass < 100g (per IMU); range = ± 10g; range = ±1200deg/s	500	5B	sacrum, thigh and shank of both legs, (lateral distal for thigh, frontal distal for shank)	underwear suit	#	correlation with jump distance, used as performance indicator
Chardonnens J, Favre J, Cuendet F, Gremion G, Aminian K	Measurement of the dynamics in ski jumping using a wearable inertial sensor-based system	10.1080/02640414.2013.845679	2014	Journal of Sports Sciences	ski jumping	ski jumping	to estimate the dynamics during take-off (i.e. position and velocity of the athlete’s CoM perpendicular to the table, resulting force acting on the athlete’s CoM perpendicular to the table, somersault angular velocity and ski acceleration perpendicular to the table) and stable flight (i.e. total aerodynamic force) using IMUs	elite (junior to World-cup level)	22M	in field	#	orientation of the sacrum, thighs, and shanks. Centre of mass linear kinematics at take-off, angular velocity at somersault, aerodynamic force at stable flight	3D accelerometer 3D gyroscope	Physilog1 (BioAGM)	mass < 100g (per IMU); range = ±10g; range = ±1200deg/s	500	5B, 2E	sacrum, thigh and shank of both legs, (lateral distal for thigh, frontal distal for shank); skis behind the bindings	underwear suit	#	the force acting on the centre of mass, acceleration of the ski perpendicular to the table, somersault angular velocity and total aerodynamic force were different between groups and correlated with the jump distances. The ski acceleration perpendicular to the table, was proposed to characterise the skis lift at take-off. The best ski jumpers have higher forces perpendicular to the table and a lar…
Chardonnens J, Favre J, Le Callennec B, Cuendet F, Gremion G, Aminian K	Automatic measurement of key ski jumping phases and temporal events with a wearable system	10.1080/02640414.2011.624538	2012	Journal of Sports Sciences	ski jumping	ski jumping	to develop a method to estimate key events to set apart jump phases	elite junior	a. 5 b. 13 (gender NS)	in field	#	phases duration	3D accelerometer 3D gyroscope	Physilog1 (BioAGM)	mass < 100g (per IMU); range = ±10g; range = ±1200deg/s	a. 200 b. 500	4B	thigh and shank of both legs, frontal distal	custom straps	#	the system is able to measure phases duration which have been shown to correlate with athletes level
Charlton PC, Kenneally-Dabrowski C, Sheppard J, Spratford W	A simple method for quantifying jump loads in volleyball athletes	10.1016/j.jsams.2016.07.007	2017	Journal of Science and Medicine in Sport	volleyball	jumping	a. to evaluate the validity of a commercially available wearable device, the Vert, for measuring vertical displacement and jump count in volleyball athletes b. to propose a potential method of quantifying external load during training and match play within this population	elite junior	18M	in field	#	jump height, jump count	NS	The Vert (Mayfonk Athletic)	dimensions = 60× 30 × 5mm^3	NS	1B	waist	elastic waist band	Sony HXR NX90P video camera	the ability to accurately and more effectively monitor loads allows coaching and support staff the opportunity to avoid training spikes
Choukou MA, Laffaye G, Taiar R	Reliability and validity of an accelerometric system for assessing vertical jumping performance	10.5604/20831862.1086733	2014	Biology of Sport	jump tests	5 Hops in place, 1 single SJ and 1 single CMJ	to examine the validity of an accelerometric system (Myotest©) for assessing vertical jump height, vertical force and power, leg stiffness and reactivity index	recreational	20M	laboratory	flight time, contact time and reactivity index (FT/CT)	height, power, leg stiffness	3D accelerometer	Myotest	mass = 60g; dimensions = 95 × 50 × 10mm^3	500	1B	middle of the lower back	belt	#	#
Chua JJC, Fuss FK, Subic A	Activity identification and classification in wheelchair rugby using fractal dimensions	10.1007/s12283-016-0213-y	2017	Sports Engineering	wheelchair rugby	whole match	to develop an evidence-based method for identification and classification of wheelchair sports (rugby) activities and performance during a match using fractal dimensions	Paralympic National State	2 2 1 (gender NS)	competition	#	percentage and mean duration of 5 types of activity	3D accelerometer	I-pod Model: A1367 (Apple)	NS	60	1E	wheelchair (not mentioned exactely where)	the mobile devices were embedded into rectangular foam blocks before being secured onto each athlete’s wheelchair frame to protect them from possible direct impacts. The mounting of the devices was unobtrusive and did not affect the athletes’ movements	#	relevance to the wheelchair rugby coach (a whole paragraph is dedicated to this issue (very nice!)): strategizing or match planning + talent identification + match analysis with activity ranking
Cockcroft J, Muller JH, Scheffer C	A novel complimentary filter for tracking hip angles during cycling using wireless inertial sensors and dynamic acceleration estimation	10.1109/JSEN.2014.2318897	2014	IEEE Sensors Journal	cycling	cycling at slow (cadence ≈ 45 rpm), medium (≈ 65 rpm) and fast (≈ 85 rpm) pedaling speed (5-minute periods)	to develop a method for measuring hip angles in cycling which combines the measurement capabilities of magneto-inertial sensors with the power and simplicity of non-linear complimentary filtering	NS	1 (gender NS)	laboratory	#	hip joint angles	3D accelerometer 3D gyroscope 3D magnetometer	MTw (Xsens)	NS	75	3B	sacrum, left and right distal third on the line between the greater trochanter and the lateral epicondyle of the knee	NS	#	a non-linear complementary filter with a novel dynamic acceleration compensation method, applicable to tracking the orientation of an IMMS attached to the thigh during cycling, was shown to drastically improve magneto-inertial tracking for the same filter, especially with increasing pedaling cadences
Cockcroft J, Muller JH, Scheffer C	Robust tracking of bicycle crank angles using magneto-inertial sensors, domain constraints and functional frame alignment techniques	10.1177/1754337116652048	2016	Proceedings of the Institution of Mechanical Engineers, Part P: Journal of Sports Engineering and Technology	cycling	cycling on a stationary trainer while pedaling at three self-selected cadences for 5 minutes at a time: slow (≈ 80rpm), medium (≈90 rpm) and fast (≈ 100 rpm)	a. to develop a method of performing the sensor-to-inertial and sensor-to-body frame alignments for the crank arm without magnetometer measurements b. to validate the method using an optical motion capture system	NS	1 (gender NS)	laboratory	#	crank angle	3D accelerometer 3D gyroscope 3D magnetometer	MTw (Xsens)	NS	120	2E	on the seat post of the bicycle frame and on the inside of the left crank arm	rigidly attached	#	a two sensor-to-body frame alignment methods for tracking the bicycle crank angle using wireless IMMSs was developed and proved unaffected by the magnetic field disturbances commonly found near bicycle pedals
Comstock BA, Solomon-Hill G, Flanagan SD, Earp JE, Luk HY, Dobbins KA, Dunn-Lewis C,Fragala MS, Ho J-Y, Hatefield DL, Vingren JL, Denegar CR,Volek JS, Kupchak BR, Maresh CM, Kraemer WJ	Validity of the Myotest® in measuring force and power production in the squat and bench press.	10.1519/JSC.0b013e318200b78c	2011	Journal of Strength and Conditioning Research	overload training	bench press, bench press throw, squat, squat jump	to conduct a concurrent validity analysis of a bar-mounted Myotest System in measuring peak force and power production as compared to a gold standard measurement system	mixed	54M, 43F	in field	#	peak force and peak power	accelerometer	Myotest Performance Measuring System (Myotest)	NS	NS	1E	inside portion of the Olympic bar just and for the squat just outside of outside of the shoulder by about 3 cm and outside of the grip in the bench press	clipped	#	when carefully fixed to a single plane, the Myotest instrument demonstrated high degree of concurrent validity along with reliability as a field testing for strength and power. The relative changes to track any type of training program will be sensitive to a <5% of treatment effect
Cormack SJ, Mooney MG, Morgan W, McGuire MR	Influence of neuromuscular fatigue on accelerometer load in elite Australian football players	10.1123/ijspp.8.4.373	2013	International Journal of Sports Physiology and Performance	Australian football	a body weight countermovement jump (CMJ) form maximum height, a Yo-Yo Intermittent recovery test level 2 (Yo-Yo IR2)	to determine the impact of neuromuscular fatigue (NMF) assessed from variables abtained during a CMJ (load per minute [LPM]) and the association between LPM and measures of running activity	elite	17M	in field	#	load per minute from individual x, y, z vectors; high speed running meters per minute and meters per minute relative to playing time	3D accelerometer	Minimax X Team 2.5 (Catapult)	NS	100	1B	in the middle of the upper back	Units were housed in a custom-made harness that prevented unwanted movement and held the units in place ?????????	GPS 5 Hz (Minimax X, Team 2.5, Catapult) Force plate to assess neuromuscular fatigue (400 Series, Fitness Technology, Adelaide, Australia)	neuromuscular fatigue affects the contribution of individual vectors to total load per minute, with a likely tendency toward more running at low speed and less acceleration
Cormack SJ, Smith RL, Mooney MG, Young WB, O'Brien BJ	Accelerometer load as a measure of activity profile in different standards of netball match play	10.1123/IJSPP.2012-0216	2014	International Journal of Sports Physiology and Performance	netball	5 matches	to determine differences in load/min (AU) between standards of netball match play	a. state league b. recreational	a. 17M b. 15M	competition	#	PlayerLoad (3D jerk)/minute	3D accelerometer	Minimax X Team 2.5 (Catapult)	NS	100	1B	middle of the upper back	in a costum-made harness	GPS 5 Hz (Minimax X Team 2.5, Catapult)	load/min (AU) measured using 3D accelerometers sampling at 100 Hz demonstrated consistent practically meaningful differences between higher and lower standards of competition, thereby providing evidence of the usefulness of load/min (AU) as a measure of activity profile in netball.
Crewther BT , Kilduff LP, Cunningham DJ , Cook C, Owen N, Yang GZ	Validating two systems for estimating force and power	10.1055/s-0030-1270487	2011	International Journal of Sports Medicine	overload training	squat jumps with a 20-kg, 40-kg, 60-kg and 80-kg load	to estimate peak force and peak power during weight lifting	weight trained, able to squat 1.5 times bodyweight	12M	in field	#	peak concentric force and power	3D accelerometer	Myotest	mass < 200g	500	1E	near the centre of the barbel, between shoulder and thumb, kept vertical	with a custom-built plastic clip	#	one must still decide on acceptable levels of bias associated with a given instrument and the subsequent applications in sport. Taken together with other information (e. g. size, portability, ease of use, cost effectiveness), these results can assist researchers and practitioners in making informed decisions about the use of each kinematic system within a specific construct
Cummins C, Orr R	Analysis of physical collisions in elite national rugby league match play	10.1123/ijspp.2014-0541	2015	International Journal of Sports Physiology and Performance	rugby	collisions during match	to investigate the impact forces of collision events during both attack and defense in elite rugby league match play and to compare the collision profiles between playing positions	elite league	28M: outside backs 5M, adjustables 5M, wide-running forwards 9M, hit-up forwards 4M	competition	#	Count of instantaneous player-collision (divided in 6 zones and obtained from resultant acceleration)	3D accelerometer	SPI-Pro X II (GPSports)	range = ±8g	100	1B	upper back between the shoulder blades	in a pocket inside the playing jersey	#	#
Cunniffe B, Proctor W, Baker JS, Davies B	An evaluation of the physiological demands of elite rugby union using global positioning system tracking software	10.1519/jsc.0b013e3181a3928b	2009	Journal of Strength and Conditioning Research	rugby	competitive team selection game	to gather information on rugby union forward and back play at the elite level and demonstrate the potential use of GPS technology in the assessment of the games’ physiological demands	elite rugby union	2M	competition	#	number and intensity of player impacts; player body load	3D accelerometer	SPI Elite (GPSports)	NS	100	1B	between the player’s shoulder blades in the upper thoracic-spine region	encased within a protective harness	GPS	use of GPS-accelerometry technology offers a valuable insight into physiological demands during match play
da Silva BVC, de Moura Simim MA, Marocolo M, Franchini E, da Mota GR	Optimal load for the peak power and maximal strength of the upper body in Brazilian jiu-jitsu athletes	10.1519/JSC.0000000000000799	2015	Journal of Strength and Conditioning Research	overload training	bench press throw	a. to determine the optimal load for PPO during the BPT in a group of BJJ athletes b. to compare PPO for different intensities (30–60% of 1RM) between the advanced (AD) and non-advanced (NA) BJJ athletes c. to compare the maximal BP strength between the AD and NA athletes	advanced non-advanced	28M	in field	#	peak power	accelerometer	Myotest Performance Measuring System (Myotest)	NS	NS	NS	NS	NS	#	#
Dadashi F, Crettenand F, Millet GP, Aminian K	Front-Crawl Instantaneous velocity estimation using a wearable inertial measurement unit	10.3390/s121012927	2012	Sensors	swimming	front crawl	to propose a new method to measure swimming velocity in front crawl, using a single body-worn inertial sensor	a. elite b. recreational	a. 6M, 5F b. 12M, 7F	in field	#	velocity in propulsion direction, instantaneous and cycle velocity	3D accelerometer 3D gyroscope	Physilog1 (BioAGM)	range = ±11g;range = ±900deg/s	500	1B	sacrum	inside the pocket of a custom designed swimming suit with a Velcro closing	#	reliable IMU-based estimate, can be practically used to measure swimming velocity as the most intuitive metric of the athlete’s performance. The system is user-centric. Still dependent on swimming pool length
Dadashi F, Crettenand F, Millet GP, Seifert L, Komar J, Aminian K	Automatic front-crawl temporal phase detection using adaptive filtering of inertial signals	10.1080/02640414.2013.778420	2013	Journal of Sports Sciences	swimming	front-crawl	to present an automatic algorithm to detect main stroke temporal features using IMUs	national level	5M, 2F	in field	temporal phase detection	inter-arm coordination	3D accelerometer 3D gyroscope	Physilog1 (BioAGM)	range = ± 10g; range = ±1200deg/s	500	3B	two forearms and sacrum	fixed distally on each forearm using medical tape, with Velcro band on the sacrum	#	the inertial system offers an automatic easy-to-use system with timely feedback for the study of swimming
Dadashi F, Millet GP, Aminian K	A Bayesian approach for pervasive estimation of breaststroke velocity using a wearable IMU	10.1016/j.pmcj.2014.03.001	2015	Pervasive and Mobile Computing	swimming	four 25m breaststroke trials from 70% to 100% of their personal maximum speed	to present a probabilistic framework for the data-driven estimation of the swimming velocity at every cycle using a low-cost wearable inertial measurement unit	national level recreational	6M, 2F 3M, 4F	in field	#	cycle mean velocity (sacrum)	3D accelerometer 3D gyroscope	Physilog3 (BioAGM)	mass = 36g; dimensions: 50 x 40 x 16 mm^3; range = ±11g; range = ±900deg/s	100	1B	sacrum	inside the pocket of the swimming suit with a Velcro closing	#	a simple tool to analyze the influence of sacrum kinematics on the performance is provided
Dadashi F, Millet GP, Aminian K	Front-crawl stroke descriptors variability assessment for skill characterisation	10.1080/02640414.2015.1114134	2016	Journal of Sports Sciences	swimming	front crawl	to characterise different skill levels based on the variability pattern of front-crawl technique descriptors	national level recreational	6M, 3F 7M, 2F	in field	duration of pull, push and non-propulsive phases, stroke length, stroke rate	instantaneous velocity, intra-cyclic velocity variation, index of coordination	3D accelerometer 3D gyroscope	Physilog 3 (Gait Up)	range = ± 11 g; range = ± 900 deg/s	500	3B	Two on the dorsal side and distal end of the swimmer forearms; the third on the sacrum	inside the pockets of a customised swimming suit	#	capturing arm stroke kinematics at every cycle using the wearable IMUs brought us a new means for the analysis of the inter-cycles variability
Dadashi F, Millet GP, Aminian K	Gaussian process framework for pervasive estimation of swimming velocity with body-worn IMU	10.1049/el.2012.3684	2013	Electronics Letters	swimming	front-crawl	to estimate the swimming velocity from some features of the acceleration signal in the global frame of movement	well-trained	13M, 7F	in field	#	velocity (sacrum)	3D accelerometer 3D gyroscope	Physilog1 (BioAGM)	range = ± 11g; range = ±900deg/s	500	1B	sacrum	NS	#	results confirm the practicality of the presented method to estimate swimming velocity using a single low-cost, body-worn IMU
Dalen T, Ingebrigtsen J, Ettema G, Hjelde GH, Wisløff U	Player load, acceleration, and deceleration during forty-five competitive matches of elite soccer	10.1519/JSC.0000000000001063	2016	Journal of Strength and Conditioning Research	soccer	45 domestic home games (over 3 full seasons)	a. to combine triaxial accelerometer and time-motion analysis to obtain new knowledge concerning player load during match play b. to determine acceleration/deceleration profiles of elite soccer players, and acceleration/deceleration contribution to player load during match play	elite	38M	competition	#	player load (downscaled square sum of the high-passed filtered accelerometer values for the respective axes), number of accelerations and decelerations	3D accelerometer	RadioEye (ZXY SportTracking AS, Radionor Communications)	sensitivity = 184mg/least significant bit (LSB) static noise = 1 mg	20	1B	NS	NS	Radio Frequency-based transponder	combined data from triaxial accelerometer and time-motion analysis demonstrate that player load is accumulated in a variety of ways across the different playing positions. To obtain a “true workload,” accelerations, decelerations and distance covered at various running speeds must all be included when evaluating a player’s total workload during a full soccer game
Davey N, Anderson M, James DA	Validation trial of an accelerometer-based sensors platform for swimming	10.1002/jst.59	2008	Sports Technology	swimming	front crawl (200m)	to validate an accelerometer-based sensor platform for swimming	elite	3M , 3F	in field	lap time, stroke count, stroke rate	#	3D accelerometer	NS	NS	NS	1B	sacrum	elastic stretch band	#	processing techniques have been developed that provide data in routine training that are usually only availabe to sports scientists, choaces, and athletes at testing sessions or intensive training camps. The paper demonstrated how traditional measures can be obtainded from accelerometer measurements with automated algorithms. The results are acceptable of better when compared with hand-timed data
Davies MJ, Young W, Farrow D, Bahnert A	Comparison of agility demands of small-sided games in elite Australian football	10.1123/ijspp.8.2.139	2013	International Journal of Sports Physiology and Performance	Australian football	to complete 4 small-side games (SSGs) of 3x45-s bouts each with modified designs	to compare the agility demands of 4 SSGs and evaluate the variability in demands for elite Australian football players	elite	14M	in field	#	Distance covered divided in speed, acceleration and hard deceleration zones, the accelerations and decelerations across 3 dimensions of body movement	3D accelerometer	MiniMax X3 (Catapult)	NS	100	1B	between the shoulder blades in the upper-thoracic-spine region	in an elastic pouch, fixed to the inside of harness underneath the training jersey	ony HDV Handy Cam digital camera (HDR-FX1E) at a 25-Hz sampling rate, GPS 5Hz	small sided games characteristics can influence agility-training demand, which can vary considerably for individuals
Del Coso J, Portillo J, Salinero JJ, Lara B, Abian-Vicen J, Areces F	Caffeinated energy drinks improve high-speed running in elite field hockey players	10.1123/ijsnem.2015-0128	2016	International Journal of Sport Nutrition and Exercise Metabolism	field hockey	simulated field hockey game	to determine the efficacy of a caffeine-containing energy drink to improve physical performance of elite field hockey players during a game	elite	13M	in field	individual running pace	instantaneous speed during the game, total number of accelerations and decelerations	accelerometer (number of components NS)	SPI-PRO-X (GPSports)	NS	15	1B	inserted into each harness	NS	GPS + heart rate band (T34; Polar, Finland)	elite field hockey players can benefit from ingesting caffeinated energy drinks because they increase the running distance covered at high-intensity running and sprinting. Increased running distance at high speed might represent a meaningful advantage for field hockey performance
Dieu O, Blondeau T, Vanhelst J, Fardy P, Bui-Xuân G, Mikulovic J	Relationship between tactics and energy expenditure according to level of experience in badminton	10.2466/29	2014	Perceptual and Motor Skills	badminton	21-point badminton set (with no extra scoring and no half-time break) against an assigned opponent	to assess the specific relationship between playing tactics and energy expenditure in badminton	structural functional technical contextual expertise	9M, 31F 25M, 15F 31M, 9F 32M, 8F 34M, 6F	in field	#	physical activity profile	3D accelerometer	GT3X (ActiGraph)	NS	NS	1B	at the height of the lumbar spine	elastic belt	#	the badminton players' physical activity was not significantly associated with their expertise. If these results can be generalized, then they suggest that greater importance should be placed on the intent in the game rather than solely on increasing physical activity. In the schools, rather than seeking only to increase the student's quantity of body movement, teaching strategies should be focus…
Dovgalecs V, Boulanger J, Davids K, et al	Movement phase detection in climbing	10.1080/19346182.2015.1064128	2014	Sports Technology	climbing	easy route (5c difficulty on French scel) of 10m height with a top-rope	to propose a method to automaticcaly detect different types of behavioural states in climbing	experienced (intermediate level)	1M	in field	#	types of behavioural states (immobility, hold exploration, pelvis movement, and global moving)	3D accelerometer 3D gyroscope 3D magnetometer	MotionPod (Movea)	range = ±8g; range = ±1600 deg/s	100	5B	pelvis, feet, forearms	#	#	this new method allows, automatic, rapid and reliable detection of behavioural states during climbing, to facilitate assessment and monitoring of climbing performance
Dowling AV, Favre J, Andriacchi TP	A wearable system to assess risk for anterior cruciate ligament injury during jump landing: measurements of temporal events, jump height, and sagittal plane kinematics	10.1115/1.4004413	2011	Journal of Biomechanical Engineering	jump tests	jump landing	assess IMU capacity of: a. measuring jump related parameters; b. evaluate ACL injury risk	recreational	20M, 18F	laboratory	initial contact, toe off	jump height, knee flex, trunk lean	a. 3D accelerometer 3D gyroscope b. 1D gyroscope 2D accelerometer	Physilog1 (BioAGM)	range = ±7g a. range = ±900deg/s b. range = ±600deg/s	240	3B	a. right thigh and shank b. chest, on the manubrium	a. rigid lightweight plastic plates, elastic straps b. tape	#	#
Dubus G	Evaluation of four models for the sonification of elite rowing	10.1007/s12193-011-0085-1	2012	Journal Multimodal User Interfaces	rowing	single sculler rowing	to enhance the training process by means of interactive sonification so that it will converge faster and closer to an optimal rowing technique (two-stages design: a. experiments were refined in stage b.)	a. elite b. elite b. casual (mean 9 years experience)	a. 2M, 5F b. 6M, 4F b. 11M, 2F	in field	#	velocity in propulsion direction, stroke rate	3D accelerometer	Witilt v3.0 (SparkFun Electronics)	range = ±6g	120	1E	boat	NS	GPS	a claim for the potential efficacy of auditory feedback to improve rowing technique
Elvin NG, Elvin AA, Arnoczky SP	Correlation between ground reaction force and tibial acceleration in vertical jumping	10.1123/jab.23.3.180	2007	Journal of Applied Biomechanics	jump tests	countermovement jump, hands free	to compare the jump heights calculated from force-plate data and accelerometer measurements	recreational	6 gender (NS)	laboratory	#	flight height	3D accelerometer	MinimaxX S4 (Catapult)	NS	100	1B	upper back, between shoulder blades	small pocket in playing jersey	#	#
Enders H, von Tscharner V, Nigg BM	The effects of preferred and non-preferred running strike patterns on tissue vibration properties	10.1016/j.jsams.2013.03.015	2014	Journal of Science and Medicine in Sport	running	treadmill running	to characterize soft tissue vibrations during running with a preferred and a non-preferred strike pattern in shoes and barefoot	active heel strike runners (15-30Km/week)	12M	laboratory	#	fast fourier transformation (first mode, mean and median) --> power and log(power) --> Damping coefficients	1D accelerometer 3D accelerometer	custom-made ADXL 78 (Analog Devices)	range = 35g; frequency response = 0–400Hz	2400	3B	muscle belly of the medial gastrocnemius; heel and 5MTPH	medical adhesive glue and then pre-loaded to the skin with stretch adhesive bandage	#	the result that a preferred movement resulted in lower damping coefficients could indicate an energetically beneficial movement pattern with respect to soft tissue vibrations
Fantozzi S, Giovanardi A, Magalhães FA, Di Michele R, Cortesi M, Gatta G	Assessment of three-dimensional joint kinematics of the upper limb during simulated swimming using wearable inertial-magnetic measurement units	10.1080/02640414.2015.1088659	2015	Journal of Sports Sciences	swimming	simulated front-crawl and breaststroke	to assess the 3D joint kinematics of the upper limbs during swimming using IMMUs by developing an appropriate adaptation of the protocol proposed by Cutti et al. (2008)	NS	8M	laboratory	#	shoulder, elbow, and wrist joint kinematics	3D accelerometer 3D gyroscope 3D magnetometer	Opal (Apdm)	NS	128	7B	trunk, upper arms, forearms, hands	Seven wooden plate clusters (width 8 cm × length 15 cm × depth 0.6 cm), containing one MIMU and four retro-reflective passive markers (10 mm diameter), were fixed onto the swimmer’s body	#	the developed protocol allowed for the first time the ability to achieve a reliable estimation of the 3D joint kinematics of the upper limbs during simulated swimming. The present findings represent an important step towards the practical use of technology based on IMMUs for the kinematic analysis of swimming
Fasel B, Favre J, Chardonnens J, Gremion G, Aminian K	An inertial sensor-based system for spatio-temporal analysis in classic cross-country skiing diagonal technique	10.1016/j.jbiomech.2015.07.001	2015	Journal of Biomechanics	cross-country skiing	diagonal stride (4 conditions changing for speed and slope)	to design an easy-to-wear system and a method to detect key temporal events and compute cycle speed and length for the diagonal stride in cross-country (XC) skiing	junior to world cup	4M, 6F	laboratory	phase detection (pole, thrust, gliding), cycle speed, cycle length	#	3D accelerometer 3D gyroscope	Physilog III (GaitUp)	mass = 36g; range = ±11g; range = ±1200 deg/s	500	2E	left ski in front of the binding left pole below the hand	NS	#	more measurements are needed to explain the role of the recovery and gliding phase durations
Fasel B, Praz C, Kayser B, Aminian K	Measuring spatio-temporal parameters of uphill ski-mountaineering with ski-fixed inertial sensors	10.1016/j.jbiomech.2016.06.017	2016	Journal of Biomechanics	uphill ski mountaineering	sky-mountaineering movement (9 conditions changing for speed and slope)	to adapt an algorithm designed originally for the diagonal stride of classical cross-country skiing (Fasel et al., 2015 - NR.166) to uphill ski-mountaineering to extract the relevant spatio-temporal parameters	recreational	12 (gender NS)	laboratory	cycle duration, thrust duration, cycle speed, cycle distance	elevation gain, slope angle	3D accelerometer 3D gyroscope	Physilog III (GaitUp)	NS	500	1E	left ski in front of the binding	NS	#	#
Fasel B, Spörri J, Gilgien M, Boffi G, Chardonnens J, Müller E, Aminian K	Three-dimensional body and centre of mass kinematics in alpine ski racing using differential GNSS and intertial sensors	10.3390/rs8080671	2016	Remote sensing	alpine skiing	giant slalom slope of 26° inclination (eleven gates)	a. to design a novel algorithm to estimate CoM kinematics based on the trajectory and speed data obtained from a differential GNSS and body segment orientations obtained from seven inertial sensors b. to reduce the number of sensor and to design and alternative algorithm c. to validate these algorithms against a camera-based stereo photogrammetric system	european cup level	6 (gender NS)	in field	#	position and speed of centre of mass	3D accelerometer 3D gyroscope	Physilog III (GaitUp)	NS	500	7B	shanks (tibial plateaou above the ski boots), thigh (lateral side, mid-distance bewteen the knee and hip joint center), on the sacrum and on the sternum, on the helmet	skin-tight underwear suit	Gnss antenna	the observed accuracy and precisoin might be sufficient for measuring performance related trajectory differences in alpine ski racing. Moreover, the CoM estimation was not based on a movement-specific model and could be used of other skiing disciplines or sports as well
Flores F, Sedano S, De Bonito A, Redondo J	Validity and reliability of a 3-axis accelerometer for measuring weightlifting movements	10.1177/1747954116676114	2016	International Journal of Sports Science & Coaching	weightlifting	power snatch, power clean and jerk from the rack	to assess the validity and reliability of measures obtained by 3-axis commercial accelerometer during weightlifting movements in comparison with kinematic data derived from the 3D videography	national	11M	laboratory	#	barbell acceleration	3D accelerometer	PS-2136A (PASCO)	mass = 130g; dimensions = 38 x 20 x 176mm^3	100	1E	in line with the long axis of the barbell on the left edge of the bar in relation to the lifter’s position	placed underneath a padded mount made of foam to protect for the shock of dropping the bar on the lift platform	#	the accelerometer studied provides valid and reliable measurements of acceleration data, however this validation should be only considered taking into account the vertical data (Z axis)
Fulton SK, Pyne DB, Burkett B	Optimizing kick rate and amplitude for Paralympic swimmers via net force measures	10.1080/02640414.2010.536247	2011	Journal of Sports Sciences	swimming	prone streamline glide (passive trials) and maximal freestyle kicking in a prone streamline (active trials)	a. assess the validity of a modified dynamometer to determine speed b. assess the reliability of a modified dinamometer and force-platform system to determine passive drag force and active force for streamlining and kicking condistions c. assess net forces at various speeds to determine optimum kick rate and optimum kick amplitude	paralympic swimmers	9M, 3F	in field	kick count and kick rate	others from other devices	3D accelerometer 1D gyroscope	MiniTraqua version5 (Cooperative Research Center for Micro-technology, Austalian Institute of Sport)	range = ±2g; range = 600deg/s	100	1B	calf	#	dynamometer, force platform	respect to soft tissue vibrations
Fulton SK, Pyne DB, Burkett B	Quantifying freestyle kick-count and kick-rate patterns in Paralympic swimming	10.1080/02640410903062936	2009	Journal of Sports Sciences	swimming	100-m front crawl (3 out of 6 ekicking only)	a. to determine changes bewteen swimming and kicking-only trials b. differences among Paralympic classes and disabilitties c. changes withn and among 100-m distances	paralympic	8M, 6F	in field	kick count, kick rate	#	3D accelerometer 1D gyroscope	MiniTraqua version5 (Cooperative Research Center for Micro-technology, Austalian Institute of Sport)	mass = 20.7g; dimensions = 52 x 33 x 11mm^3; range = ±2 g; angular rate sensor > 4600 rad/s; data storage 256-megabyte	100	1,2B (depends on level of amputation on affected side)	shank (dominant leg)	#	#	that a preferred movement resulted in lower damping coefficients
Fulton SK, Pyne DB, Burkett B	Validity and reliability of kick count and rate in freestyle using inertial sensor technology	10.1080/02640410902998247	2009	Journal of Sports Sciences	swimming	100-m front crawl (3 out of 6 ekicking only)	to evaluate the application of inertial sensor technology to quantify kick count and kick rate in front crawl	paralympic	8M, 4F	in field	kick count, kick rate	#	3D accelerometer 1D gyroscope	MiniTraqua version5 (Cooperative Research Center for Micro-technology, Austalian Institute of Sport)	mass = 20.7g; dimensions = 52 x 33 x 11mm^3; range = ±2 g; range = 600 deg/s; data storage 256-megabyte	100	1B	thigh or shank of both legs (when available) posterior placement as did not inhibit kicking movements	tape	#	could indicate an energetically beneficial movement pattern
Gabbett T, Jenkins D, Abernethy B	Physical collisions and injury during professional rugby league match-play	10.1016/j.jsams.2010.03.007	2010	Journal of Science and Medicine in Sport	rugby	physical collisions in rugby training	to describe the number and intensity of collisions occurring in skills training during the course of a professional rugby league season and relate this to the recovery periods between matches	elite rugby league	30M	in field	#	PlayerLoad peaks (3D jerk), number and intensity of collisions	3D accelerometer 3D gyroscope	Minimax X (Catapult)	NS	100	1B	on the upper back	in a small vest	GPS 5 Hz	these findings highlight that significant physiological demands are placed on players during rugby league training sessions, and that consideration should be given to the number and intensity of collisions performed when periodising training and recovery cycles within the training schedule
Gabbett TJ	Influence of playing standard on the physical demands of junior rugby league tournament match-play	0.1016/j.jsams.2013.03.01	2014	Journal of Science and Medicine in Sport	rugby	rugby match	to investigate physical demands on junior players at different standards of torunament	experienced	60 (gender NS)	competition		running intensity, number and type of collision, number repeated high intensity bouts	3D accelerometer 1D gyroscope	MinimaxX (Catapult)	NS	100	1B	upper back	warn in a small vest	GPS 5 Hz	physical demands can be assessed with this GPS and accelerometer system, usefull to plan training
Gabbett TJ	Influence of the opposing team on the physical demands of elite rugby league match play	10.1519/JSC.0b013e318274f30e	2013	Journal of Strength and Conditioning Research	rugby	an NRL season data analyzed by comparing the activity profiles of players competing against high-ranked (Top 4) and low-ranked (Bottom 4) teams	to investigate if higher standard Australian National Rugby League matches were associated with greater physical demands than lower standard matches	elite (league)	22M	competition	#	physical collisions and repeated high-intensity efforts	3D accelerometer 3D gyroscope	MinimaxX (Catapult)	NS	100	1B	upper back	worn in a small vest	GPS 5 Hz	the physical demands of rugby league are greater when winning than losing and when competing against lower ranked teams, suggesting that the competitive advantage of successful National rugby League teams is closely linked to their ability to maintain a higher playing intensity than their less successful counterparts
Gabbett TJ	Relationship between accelerometer load, collisions, and repeated high-intensity effort activity in rugby league players	10.1519/JSC.0000000000001017	2015	Journal of Strength and Conditioning Research	rugby	26 rugby league matches	to investigate the relationship between player load (and its variants), collisions, and repeated high-intensity efforts activity in rugby league players	elite rugby league	182M	competition	#	PlayerLoad (3D jerk), number of collisions	3D accelerometer 3D gyroscope	MinimaxX S4 (Catapult)	NS	100	1B	upper back	worn in a small vest	GPS 10 Hz	findings suggest that the relationships between player load and the number of collisions and repeated high-intensity effort bouts performed during match play are stronger in positions where contact and repeated-effort demands are high
Gabbett TJ	Sprinting patterns of national rugby league competition	10.1519/JSC.0b013e31821e4c60	2012	Journal of strength and Conditioning Research	rugby	16 professional rugby league matches	to investigte the sprinting demands of National Rugby League (NRL) competition and characterize the sprinting patterns of different rugby league playing positions	elite league	37M	competition	#	speed, acceleration, presence\absence of physical collisions and repeated high-intensity efforts	3D accelerometer 3D gyroscope	MinimaxX (Catapult)	NS	100	1B	upper back	in a small vest	GPS 5 Hz	#
Gabbett TJ, Abernethy B, Jenkins DG	Influence of field size on the physiological and skill demands of small-side games in junior and senior rugby league players	10.1519/JSC.0b013e318225a371	2012	Journal of strength and Conditioning Research	rugby	on day 1, 2 teams played an 8-minute small-sided game on a small ﬁeld (10-m width x 40-m length), whereas the remaining 2 teams played the small-sided game on a larger sized ﬁeld (40-m width x 70-m length). On day 2, the groups were crossed over	to investigate the effect of changes in field size on the physiological and skill demands of small-sided games in elite and senior rugby league players	a. elite senior b. elite junior	a. 16M b. 16M	in field	#	speed, distance, position, acceleration	3D accelerometer	MinimaxX (Catapult)	NS	100	1B	upper back	in a small vest	a 37-mm digital video camera (Sony, DCR-TRV 950E), GPS 5Hz	field size affects physiological and skill demands of small-sided games. Elite junior and senior rugby league players cover greater total distances and greater distances at moderate, high, and very-high intensities during small-sided games played on a larger field
Gabbett TJ, Gahan CW	Repeated high-intensity-effort activity in relation to tries scored and conceded during rugby league match play	10.1123/ijspp.2015-0266	2016	International Journal of Sports Physiology and Performance	rugby	21 matches	to examine the nature and frequency of rugby league repeated high-intensity-effort (RHIE) activity in relation to tries scored and conceded in successful and unsuccessful teams	semi-professional	185M	competition	#	repeated high-intensity-effort bouts	3D accelerometer 3D gyroscope	MinimaxX S4 (Catapult)	NS	100	1B	NS	NS	GPS 5 Hz	the study demonstrates that the majority of rugby league repeated high-intensity-effort bouts occur at critical periods during match play. Successful rugby league teams performed more bouts before conceding tries, while unsuccessful teams performed more bouts before scoring tries. These findings demonstrate that unsuccessful teams are required to work harder to score tries, while successful teams…
Gabbett TJ, Jenkins DG, Abernethy B	Physical demands of professional rugby league training and competition using microtechnology	10.1016/j.jsams.2011.07.004	2012	Journal of Science and Medicine in Sport	rugby	national Rugby League training sessions and matches over one playing season	to investigate the physical demands of professional rugby league match-play and to compare these demands with typical training activities used to prepare players for professional rugby league competition. The role of positional groups is also investigated	elite (rugby league)	30M	competition	repeated high-intensity efforts duration and frequency	#	3D accelerometer 3D gyroscope	MinimaxX (Catapult)	NS	100	1B	upper back	worn in a small vest	GPS 5 Hz	microtechnology allows to verify if training matches the specific physical demands of rugby league match-play and can be used to develop most specific forms of conditioning
Gabbett TJ, Jenkis DG, Abernethy B	Influence of wrestling on physiological and skill demands of small-sided games	10.1519/jsc.0b013e31821d97f4	2012	Journal of Strength and Conditioning Research	rugby	rugby match	to investigate the influence of wrestling on the physiological and skill demands of small-sided games	elite league	28M	in field	#	speed, distance, position, acceleration	3D accelerometer	MinimaxX (Catapult)	NS	100	1B	upper back	in a small vest	37 mm digital video camera (Sony, DCR-TRV 950 E), GPS 5Hz	1) technology-based coding of skill execution allows coaching and performance staff to plan training to ensure that players are receiving an appropriate physiological and skill training stimulus; 2) analyzing the time course of skill-data changes, rather than a summary of skill data at the end of the game, provides an insight into the possible effects of fatigue and pacing on training performance.
Gageler WH, Wearing S, James DA	Automatic jump detection method for athlete monitoring and performance in volleyball	10.1080/24748668.2015.11868793	2015	International Journal of Performance Analysis in Sport	volleyball	jumps	a. to evaluate the accuracy with which jumps can be automatically detected during training and game situations using inertial sensors b. the ToF is then calculated and verified	state level national level	7M, 5F 2M, 5F	in field	#	jump detection, time of flight	3D accelerometer	GPSports Systems	range = ±8g	100	1B	upper back adjacent to the T10 vertebrae	in a commercially available sports vest	#	#
Gallo T, Cormack S, Gabbett T, Williams M, Lorenzen C	Characteristics impacting on session rating of perceived exertion training load in Australian footballers	10.1080/02640414.2014.947311	2015	Journal of Sports Sciences	Australian football	skill-based training	to determine whether experience, playing position and time-trial performance impacted s-RPE training load	elite	41M	in field	#	PlayerLoad (3D jerk)	3D accelerometer	MinimaxX, Team 2.5, (Catapult)	NS	100	1B	posterior side of the upper torso between the shoulder blades	worn in a custom-made vest, fitting the unit tightly against the shoulder blades	GPS 10 Hz (MinimaxX ,Team 2.5, Catapult)	PlayerLoad measured from triaxial accelerometers in GPS devices, used to estimate internal load, provides insight into relationships between playing experience, playing position and 2-km time-trial performance
Gandy E, Pigott T, Hogg R, Bondi A	A preliminary investigation of the use of inertial sensing technology for the measurement of hip rotation asymmetry in horse riders	10.1080/19346182.2014.905949	2014	Sports Technology	horse riding	trot, circles, change of directions	to investigate the use of inertial sensing technology as an indicator of asymmetry in horse riders, evidenced by discrepancies in the angle of external rotation of the hip joint	advanced and recreational level combinations	1M, 6F	in field	#	hip external rotation; asymmetry	3D accelerometer 3D gyroscope 3D magnetometer	Xsens MVN (Xsens)	NS	120	17B	full body set up	lycra suit	#	inertial sensing technology is a practical tool for the measurement of asymmetry in rider hip angle rotation, enabling data analysis to include movements carried out within normal riding activity
Gao Z, Song B, Liu M, Song GM, Sun WQ, Ge YJ	Design and application of a multidimensional acceleration sensor for coaching of shot-put athletes	10.1016/j.sna.2008.11.029	2009	Sensors and Actuators A	athletics	shot put	to develop an advanced sensing system embedded in a standard shot to acquire kinetic data during throwing for performance analysis of skilled shot-putters	national	F	laboratory	#	raw accelerations	3D accelerometer	NS	net mass = 4,05kg; dimension 102mm; range = ±10g; accuracy = 1%FS; overload capacity = 400%FS	171	1E	embedded in the shot	sensor embedded in a modular system composed of: metal cover, elastomer pressing loop, analog PCB, elastic body, compensatory mass and airproof loop. To reduce mech vibration and improve system damping, the compensating mass and the elastic body are submerged in the oil sealed by the airproof loop.	Overall system includes a six-axis force/torque measuring plate SAFMS-T, EMG remote device, 2 high-speed cameras (JVC9800)	the system support in-field kinetic analysis of the throwing technique of the shot-put, supporting coaching but without giving feedback to the athlete
García-Pérez JA, Pérez-Soriano P, Belloch SL, Lucas-Cuevas AG, Sánchez-Zuriaga D	Effects of treadmill running and fatigue on impact acceleration in distance running	10.1080/14763141.2014.909527	2014	Sports Biomechanics	running (distance running)	run overground and on a treadmill (at 4.0 m/s) before and after a fatigue protocol consisting of a 30-minute run at 85% of individual maximal aerobic speed	to analyse, under pre- and post-fatigue conditions, the effect of treadmill running on impact acceleration and shock attenuation	recreational	11M, 9F	in field	#	peak impact acceration, and time between the minimum and maximum acceleration	1D accelerometer	custom-made MMA7261QT (Freescale Semiconductor)	mass = 55g; dimensions = 64 x 42 x 24mm^3	100	2B	the proximal anteromedial aspects of the right tibia and around the forehead	elastic belts		running on a treadmill compared with running overground was found to significantly modify the peak impact acceleration and impact rate in a non-fatigued condition. The effect of the treadmill on the accelerations depended on the runner’s fatigue state, and the effect of the runner’s fatigue state on the accelerations was also influenced by the running surface
Gašic T, Bubanj S, Živkovic M, Stankovic R, Bubanj R, Obradovic B	Difference in the explosive strength of upper extremities between athletes in relation to their sport activity, type of engangement in sport and gender	#	2011	Sport Science	overload training	bench press	to determine difference in the explosive strength of upper extremities between athletes in relation to their sport activity, type of engagement in sport	a. recreational b. combat c. soccer d. middle distance running e. other f. basketball g. volleyball h. swimming i. handball	a. 5 b. 13 c. 33 d. 4 e. 7 f. 13 g. 7 h. 5 i. 7 74M, 20F	in field	#	power (W/kg), force (N/kg), velocity (cm/s)	3D accelerometer	Myotest	NS	NS	1E	barbell	on the barbell	#	the data indicates that explosive strength characteristics are not specific to each group of athletes, nor to the type of engagement in sport (recreational and professional). Only differences between specific disciplines were found probably due to training specificity
Gastin PB, McLean O, Spittle M, Breed RVP	Quantification of tackling demands in professional Australian football using integrated wearable athlete tracking technology	10.1016/j.jsams.2013.01.007	2013	Journal of Science and Medicine in Sport	Australian football	tackling	a. to describe and quantify the frequency, velocity and impact accel in Australian football tackling using video and tracking technology b. to assess the ecological validity of accelerometer impact data against the criterion measure of observed and categorised tackles from video footage	professional	20 (gender NS)	competition	#	velocity, acceleration, PlayerLoad (3D jerk)	3D accelerometer	MinimaxX S4 (Catapult+P84)	NS	100	3B	upper back, between shoulder blades	small pocket in playing jersey	GPS 10 Hz	GPS/acceleromter technology can succesfully differentiate tackles of varying intensity and show potential for assessing velocity, impact accelerations and related physical loads in contact invasion sports
Gastin PB, Mclean OC, Breed RVP, Spittle M	Tackle and impact detection in elite Australian football using wearable microsensor technology	10.1080/02640414.2013.868920	2014	Journal of Sports Sciences	Australian football	four matches of Australian football	to assess the effectiveness of a wearable microsensor device (MinimaxXTM S4, Catapult , Melbourne, VIC, Australia) to automatically detect tackles and impact events in elite Australian football (AF), during four matches	elite	20M	competition	#	Player Load™ (3d jerk), tackle number and intensity	3D accelerometer 3D gyroscope	Minimax X (Catapult)	NS	100	1B	upper back between the shoulder blades	worn in a small pocket located in the playing jersey	GPS	the MinimaxX algorithm was unable to detect tackles in AF, but only detecting the majority of player collisions. Until it is further refined and validated, the use of accelerometer data is best when used in combination with other technologies (e.g. video coding) or to provide assessment of the overall physical loads in contact sports
Gaudino P, Iaia FM, Strudwick AJ, Hawkins RD, Alberti G, Atkinson G, Gregson W	Factors influencing perception of effort (session rating of perceived exertion) during elite soccer training	10.1123/ijspp.2014-0518	2015	International Journal of Sports Physiology and Performance	soccer	team field-based training sessions	to identify the external-training-load markers that are most influential on session rating of perceived exertion of training load during elite soccer training	elite	22M	in field	number of impacts and impacts per minute	magnitude acceleration, speed, energy expenditure	3D accelerometer 3D gyroscope 3D magnetometer	STATSports Viper (STATSports)	NS	100	1B	NS	a vest tightly fitted to each player	GPS 10 Hz	it seems that in some combination, speed, acceleration, and impacts are likely to be strong predictors of RPE-TL in soccer
Gescheit DT, Cormack SJ, Reid M, Duffield R	Consecutive days of prolonged tennis match play: performance, physical, and perceptual responses in trained players	10.1123/ijspp.2014-0329	2015	International Journal of Sports Physiology and Performance	tennis	whole match (4h x 4days)	to determine how consecutive days of prolonged tennis match play affect performance, physiological, and perceptual responses	professional	7M	in field	#	total workload, relative workload (contribution of each component)	3D accelerometer	Minimax X (Catapult)	NS	100	1B	between the scapulae	custom-made pouches	Memory Belt (Suunto Oy) for heart rate measurement; video camera (DSR-PDX10P, Sony); electronic timing gates (SpeedLight TT, Swift Performance Equipment) for 20-m sprint time; portable forceplate (400s, Fitness Yechnology) for CMJ measurements and Isometric midthigh pull measurements; handheld dynamometer (Power Track II, JTech) for MVC of the dominant shoulder	physical-performance and tennis coaches should focus on tailored repeat-effort high-intensity training and specific strength training to help defend against reductions in stretch-shortening-cycle-based movements, thus helping athletes meet the demands of tournament tennis; psychological strategies to overcome stress and improve mood state and motivation in conjunction with physical-recovery modal…
Ghasemzadeh H, Jafari R	Coordination analysis of human movements with body sensor networks: a signal processing model to evaluate baseball swings	10.1109/JSEN.2010.2048205	2011	IEEE Sensors Journal	baseball	baseball swing	to build a signal processing model for evaluation of baseball swings in terms of coordination between body segments by processing raw sensor readings acquired from movements of hip, shoulder and arm	novices	3M	laboratory	#	timing of hip rotation, shoulder rotation, arm extension, statistical parameters extracted from raw data	3D accelerometer 2D gyroscope	custom-made TelosB motes from for data acquisition managing (Xbow®)	NS	50	3B	wrist, chest, "hip"	not mentioned from figure elastic bands below and above the sensors	#	we plan prepared the system for generating transcripts of various human movements using body sensor networks, and developed a technique for measuring coordination between body segments. We further demonstrated the effectiveness of motion transcripts for analysis of baseball swings using inertial data collected from several subjects
Ghasemzadeh H, Loseu V, Jafari R	Wearable coach for sport training: a quantitative model to evaluate wrist-rotation in golf	10.3233/AIS-2009-0021	2009	Journal of Ambient Intelligence and Smart Environments	golf	golf swing (takeaway, backswing, downswing and follow-through) with respect to the wrist rotation 10 trials for 9 wrist rotation conditions for each subject	to develop a quantitative model (Principal Component Analysis + Local Discriminant Analysis) able to provide feedback of the quality of golf swing movements using a body sensor network (BSN)	NS	3M, 1F	laboratory	#	quantitative model (Principal Component Analysis and Local Discriminant Analysis) specific for typical golf errors	3D accelerometer 2D gyroscope	custom-made TelosB motes for data acquisition managing (Xbow®)	NS	50	3B, 2E	right wrist, left arm, on the back at waist level; golf club (near the club head and near the grip)	not mentioned from figure elastic bands below and above the sensors	#	two main criteria exist with respect to which golf swing performance is assessed/defined: wrist rotation and out-of-plane movements. The study does not provide further elements to assess golf swing performance, but aims at providing coaches/athletes a method for performance evaluation using wrist rotation as the main criteria. The method, however, does not work in real time. Authors speculate tha…
Giandolini M, Poupard T, Gimenez P, Horvais N, Millet GY, Morin JB, Samozino P	A simple field method to identify foot strike pattern during running	10.1016/j.jbiomech.2014.03.002	2014	Journal of Biomechanics	running	treadmill running (different speeds, slopes, strike patterns, shoes, with/without fatigue)	to validate a simple method to identify foot strike pattern during running (RFS, MFS, FFS = rearfoot, midfoot, forefoot strike)	experienced	a. validation 11M, 3F b. application 19 M, 15F	laboratory	#	time between heel and metatarsal peak acceleration	1D accelerometer	custom-made ADXL150 (Analog Devices)	range = ± 5g	1000	2E	on the right shoe: at the heel above the midsole and at the fifth metatarsal head above the midsole on the external face	securely fixed with strapping and Dual Lock™ (3M, St.Paul,USA)	#	The proposed method might allow easier footstrike identification insitu. Thus, researchers may clarify the debate on a possible relationship between performance and running patterns.
Gindre C, Lussiana T, Hebert-Losier K, Morin J	Reliability and validity of the Myotest® for measuring running stride kinematics	10.1080/02640414.2015.1068436	2016	Journal of Sports Sciences	running	two 60m trials at 12, 15, 18, 21 km*h^-1	to assess the reliability and validity of the Myotest accelerometer-based system for measuring running stride kinematics	experienced (habitual runners)	20M	in field	contact time, aerial time, and step frequency	#	accelerometer	Myotest	NS	500	1B	waist	neoprene belt	#	the Myotest is a practical portable device that is reliable for measuring contact time, aerial time and step frequency during running. In terms of calidity, it provides accurate step frequency measures but underestimates contact time and overestimates aerial time compared to photocell and optical-based systems
Giroux C, Rabita G, Chollet D, Guilhem G	What is the best method for assessing lower limb force-velocity relationship?	10.1055/s-0034-1385886	2015	International Journal of Sports Medicine	weightlifting	squat jumps with increasing load	to determine the concurrent validity and reliability of force, velocity and power measurements provided by accelerometry, linear position transducer and Samozino’s methods, during loaded squat jumps	11 sedentary, 6 elite	8M, 9F	laboratory	#	force, velocity and power	3D accelerometer	Myotest Pro (Myotest)	NS	500	1E	on the barbell	NS	NS	the 3 present methods are similarly valid for assessing mean mechanical parameters determined during the push-off phase of a squat jump performed under different loading conditions. The findings and the ease of use of the Samozino’s procedure suggest that this method is more suitable for monitoring power training sessions under field conditions
Gomez-Piriz PT, Sanchez ET, Manrique DC, Gonzalez EP	Reliability and comparability of the accelerometer and the linear position measuring device in resistance training	10.1519/JSC.0b013e318269f809	2013	Journal of Strength and Conditioning Research	overload training	bench press	to determine the intermachine reliability attained from devices used to measure the common variables in sports performance	athletes	3 (gender NS)	in field	#	peak power, max force, max velocity	3D accelerometer	Myotest	mass = 58 g; dimensions = 54.2 x 102.5 x 10.7mm^3	200–500	1E	lateral edge of the barbell	#	LPM (Isoinertial Dynamometer, Model TF-100, T-Force System; Ergotech)	#
Gonçalves B, Figueira B, Maçãs V, Sampaio J	Effect of player position on movement behaviour, physical and physiological performances during an 11-a-side football game	10.1080/02640414.2013.816761	2014	Journal of Sports Sciences	soccer	simulated competition	to identify differences in time–motion, modified training impulse, body load and movement behaviour between defenders, midfielders and forwards	elite youth	22M	competition	#	workload	3D accelerometer	SPI-Pro (GPSports)	NS	100	1B	on the upper back of each player.	into appropriate harnesses	GPS 5 Hz	the analysis of the movement behaviour of a specific team formation (4-3-3) identify meaningful effects and interactions in all variables across the players’ positions. All players (defenders, midfielders and forwards) were nearer and more coordinated with their own position- specific centroid, this variable being a potential important information constraint for decision-making and action. The ti…
Gouttebarge V, Wolfard R, Griek N, de Ruiter CJ, Boschman JS, van Dieën JH	Reproducibility and validity of the Myotest for measuring step frequency and ground contact time in recreational runners	10.1515/hukin-2015-0003	2015	Journal of Human Kinetics	running (distance running)	three runs of 400 meters on an outdoor athletic track: the first run at an approximated speed of 10 km/h, the second run at an approximated speed of 12 km/h, and the third run at an approximated speed of 14 km/h (approximated speed fed back verbally every 100 m)	to assess the reproducibility (test-retest reliability and agreement) and concurrent validity of the Myotest for measuring step frequency (SF) and ground contact time (GCT) in recreational runners. SF and GCT were also assessed with a foot-mounted accelerometer (Gold Standard)	recreational	11M, 3F	in field	ground contact time in milliseconds, step frequency steps per minute	#	3D accelerometer	Myotest	mass = 59g; dimensions = 54.2 x 102.5 x 10.7mm^3; sampling freq range = 200-500 samples/s	NS	1B	around the runner’s iliac crest, on the ventral side of the body	Velcro waistband	#	the Myotest can be used by runners and coaches to assess and monitor SF outside on an athletic track. For measuring GCT, the Myotest should not be used yet as it was not sufficiently reliable nor valid
Groh BH, Flaschka J, Wirth M, Kautz T, Fleckenstein M, Eskofier BM	Wearable real-time skateboard trick visualization and its community perception	10.1109/MCG.2016.95	2016	IEEE Computer Graphics and Applications	skateboarding	11 skateboard tricks	to present a real-time trick classification and visualization system in skateboarding and report on a survey about its usefulness and acceptance	average 10 years experience	27 (gender NS)	NS	landing instant	L1-norm of 3D acceleration; L1-norm of 3D angular acceleration	3D accelerometer 3D gyroscope 3D magnetometer	Shimmer 3 (Shimmer)	range = ±16g ; range = ±2,000deg/s; range = ±0.19 mT; resolution = 16-bit per axis	102.4	1E	to the bottom of the skateboard	NS	#	feasibility of an informative real-time trick visualization in skateboarding, The results of the survey indicate that the immediate feedback received thanks to the computer-assisted support for skateboarding is well received by most skateboarders, more than delayed video feedbacks
Gullstrand L, Halvorsen K, Tinmark F, Eriksson M, Nilsson J	Measurement of vertical displacement in running, a methodological comparison	10.106/j.gaitpost.2009.03.001	2009	Gait & Posture	running	running on a treadmill	to investigate the validity of sacrum vertical displacement as a measure of COM vertical displacement and to compare three methods for measuring sacrum vertical displacement (position transucer, accelerometers, photogrammetry)	trained in running (running, orienteering, soccer, decathlon)	13M	laboratory	#	vertical displacement	1D accelerometer	custom-made 8305B10 (Kistler)	range = ±10g	NS	2B	sacrum	#		single point recordings of the sacrum vertical displacement may be used to monitor changes in vertical displacement of the COM, accelerometer reliability lower than position transducer and stereophotogrammetry
Hagem RM, O'Keefe SG, Fickenscher T, Thiel DV	Self contained adaptable optical wireless communications system for stroke rate during swimming	10.1109/JSEN.2013.2262933	2013	IEEE Sensors Journal	swimming	front crawl (50m fast and slow strokes), simulated swimming (front crawl, breast stroke, back stroke, butterfly)	to present a wrist mounted accelerometer and optical wireless communications to display goggles to five real time feedback to a swimmer	NS	1 (gender NS)	in field	stroke rate, stroke length, velocity	#	3D accelerometer	custom-made MMA7260QT (Pololu)	NS	NS	1B	wirst	NS	optical transmitter and receiver, goggles with RGB led	hardware, software and implementation modifications to improve the system are successfully tested
Hamill J, Derrick TR, Holt KG	Shock attenuation and stride frequency during running	10.1016/0167-9457(95)00004-C	1995	Human Movement Science	running	treadmill ( ±10, H68 % of preferred stride frequency at preferred running speed)	to determine the relationship bewteen stride frequency and shock attenuation and to determine whether shock attenuation may also be considered an optimality criterion	recreational (experienced in running on treadmill)	10M	laboratory	stride frequency	head and leg impact acceleration, shock attenuation (transfer function with ratio of power spectral densities of head to leg)	1D accelerometer	(PCB Piezotronics)	NS	1000	2B	distal antero-medial aspect of the leg and frontal bone of the head	mounted on an aluminum bracket, then sercured with elastic straps tightened to the threshold of subject tolerance	Pressure sensitive material and metabolic analysis system	shock attenuation increases with stride frequency, cannot be considered as an optimization criterion ; at all stride frequencies head accelerations were maintained at a constant level
Hang YS, Lippert FG, Spolek GA, Frankel VH, Harrington RM	Biomechanical study of the pitching elbow	10.1007/bf00265715	1979	International Orthopaedics	baseball	pitching	to correlate elbow load with pitching style using accelerometers to evaluate mechanics	ex/ current college or minor league	10 (gender NS)	in field	#	normalized elbow forces	3D accelerometer	A314-TMU (Glen-nite)	mass = 60g	2	1B, 1E	forearm and hand-ball system	A splint, 150g, 4X20cm, made of a plastic forearm plate contoured to the forearm and attached to an upper arm cuff by a hinge joint that allowed the plate to maintain its longitudinal axis parallel with the forearm. (Cuff fastened to the upper arm, splint loosely attached to the forearm using Velcro straps to allow forearm rotation beneath the plate while the splint maintained its co-ordinate axi…	stroboscopy photography and EMG for complementary measures	pronation and supination documented and contribute to the direction of the ball spin. --> accelerometers can be used to evaluate pitching mechanics
Harding JW, Mackintosh CG, Martin DT, Hahn AG, James DA	Automated scoring for elite half-pipe snowboard competition: important sporting development or techno distraction?	10.1002/jst.69	2008	Sports Technology	half-pipe snowboard	half-pipe snowboarding	a. to compare traditional subjective judging results with those predicted using purely objective data with no reference to style or execution. b. to explore the utility of incorporating microtechnology to enhance the ‘‘fairness’’ of judging world-class snowboarding athletes. c. rankings established based on IMU data to gauge the acceptance of this objective evaluation approach within an elite sno…	elite	10M	competition	air time	degrees of rotation for aerial maneuvers	3D accelerometer 3D gyroscope	NS	range = ± 6g; range = ±1200 deg/s	100	1B	lower back, 5cm left of the spine	small carry bag with a thin belt	#	a. objective evidence of the importance air time and degree of rotation have in half-pipe snowboard. b. using objective information and a prediction equation based on previously-established weightings for important key performance variables, 74 per cent of the shared variance associated with subjectively-judged competition scores was accounted for.
Hausswirth C, Le Meur Y, Couturier A, Bernard T, Brisswalter J	Accuracy and repeatability of the Polar ® RS800sd to evaluate stride rate and running speed	10.1055/s-0028-1105936	2009	International Journal of Sports Medicine	running	treadmill running	to evaluate the accuracy and the repeatability of a new running computer system	well trained triathletes	8 (gender NS)	laboratory	stride rate	running speed	1D accelerometer	RS800sd (Polar Electro)	mass = 20g; dimensions = 35 × 50 × 7 mm^3	1	1E	top of the shoes	shoe laces	gas analyser Cosmed K4b 2 System (Cosmed, Roma, Italy)	Running speed and frequency can be obtained with a device that is practical and useful for fi eld testing
Helten T, Brock H, Muller M, Seidel H	Classification of trampoline jumps using inertial sensors	10.1007/s12283-011-0081-4	2011	Sports Engineering	diving	trampoline jumping	to build a motion classification system for automatically classifying trampoline routines based on inertial sensor input	non professional athletes with intermediate skills	4F	in field	#	inclination of body segments, angles between segments, angular velocity about the cranio-caudal axis	3D accelerometer 3D gyroscope 3D magnetometer	MTx (Xsens)	NS	NS	7B	trunk, forearms, upper and lower legs	in a suit	#	to handle significant performance variations, a masking scheme based on variance templates was introduced. Future online applications could include the provision of a direct feedback for performance improvement
Herren R, Sparti A, Aminian K, Schutz Y	The prediction of speed and incline in outdoor running in humans using accelerometry	10.1097/00005768-199907000-00020	1999	Medicine and Science in Sports and Exercise	running	overground running 18 times at various speeds (between 2.6 and 5.8 m·s-1) on tracks (80-100 m long) of different inclines: 9 different slopes ranging from -0.109 rad (-10.9%) to 0.109 rad (+10.9%)	to test whether accelerometric measurements could be used to accurately estimate speed and incline of overground running	all practiced sport at least once a week and most of them ran more than 10 km a week	10M, 10F	in field	heel strike	speed and incline	a. 3D accelerometer b. 1D accelerometer	custom-made (Metrology Laboratory of the Swiss Federal, Institute of Technology in Lausanne)	a. range = ±5g; b. range = ±10g; frequency range = 0-350Hz	200	3B	a. on lower back (L4-L5); b. acc on the heel	Velcro elastic belt (lower back), not specified (on Achilles tendon just above the ankle)	#	the energy cost of running depends upon speed, incline, running efficiency and body weight of the runner
Hoppe M, Baumgart C, Freiwald J	Do running activities of adolescent and adult tennis players differ during play?	#	2016	International Journal of Sports Physiology and Performance	tennis	running activities	to investigate differences in running activities between adolescent and adult tennis players during match play	well trained adolescents well trained adults	20M 20M	NS	#	velocity, acceleration, deceleration, metabolic power, PlayerLoad™, and number of accelerations toward the net and the forehand and backhand corners	3D accelerometer	MinimaxX S4 (Catapult)	NS	100	1B	between the scapulae	beneath the players’ attire in custom-made neoprene harnesses	GPS 10 Hz	the observed differences in movement directions indicate that different training emphases should be applied. While technical-tactical skill training in adolescents may accentuate the reduction of unforced errors, training in adults may highlight the realization of playing strategies
Hou P	The study on swimming exercises based on 3D accelerometer data analysis	10.4156/ijact.vol4.issue21.28	2012	International Journal of Advancements in Computing Technology	swimming	front crawl, breast stroke, back stroke	a. to find how swimming exercise can be tracked efficiently b. to find how reduction of sampling frequency affects tracking accuracy c. to compare different sensor placement	NS	11 (gender NS)	in field	number of turns, number of strokes	swimming style recognition, swimming speed, swim distance, energy expenditure estimation	3D accelerometer	NS	mass = 18g	5-50	2B	wrists	NS	#	swimming exercise are tracked based on low frequency acceleration data (this can be done with high accuracy using light methods and low sampling frequency and using wrist-worn or upper back-worn sensors); in the case of the swimming style recognition, the upper back sensor is more accurate, but when the number of strokes was calculated and the intensity of exercise was estimated, the sensors were…
Hurst HT, Atkins S, Kirk C	Reliability of a portable accelerometer for measuring workload during mixed martial arts	10.4172/2324-9080.1000172	2014	Journal of Athletic Enhancement	mixed martial arts	isolated strikes (jabs , crosses , left and right hooks, leg and body kicks), takedowns	to determine the reliability of a commercially available accelerometer system for measuring the workloads during mixed martial arts specific movements	trained competitors	8M	in field	#	PlayerLoad (3D jerk)	3D accelerometer	Minimax X3 (Catapult)	NS	100	1B	worn on the torso at the T3-4 vertebrae	neoprene harness secured in place using duct tape	#	portable accelerometry can be reliably used to determine the external workload during a range of mixed martial Arts striking and grounding techniques
Innocenti B, Facchielli D, Totti S, Verza A	Analysis of biomechanical quantities during a squat jump: evaluation of a performance index	10.1519/R-17815.1	2006	Journal of Strength and Conditioning Research	jump tests	squat jump	to evaluate performance indexes based on cinematic trends of several athletes during the execution of a squat jump	elite, non-elite	15M	in field	#	kinematics (speed,velocity,acceleration) at key time frames. Acceration areas at unload and contraction phases.	1D accelerometer	Pitbull PB3APN (Oceana Sensor Technologies)	NS	4000	1B	front back, belly height	a semirigid belt	#	acceleration areas for the unweighting and contraction phases differentiate athletes familiar and not familiar with the SJ. These indices aid sports planning a) to evaluate whether a gesture has been well learned or not ; b) to evaluate the progress and possible regress during training; c) to compile the history of training; d) to design training consisting of increasingly difficult steps
Jaitner T, Schmidt M, Nolte K, Rheinländer C, Wille S, Wehn N	Vertical jump diagnosis for multiple athletes using a wearable inertial sensor unit	10.1080/19346182.2015.1117476	2016	Sports Technology	jumping	five drop jumps from three different heights (31.5, 40, and 50 cm)	to develop and validate of an inertial sensor-based device for detecting explosive jump events by elite athletes	sub-elite	7M, 3F	in field	stance and flight duration	jump height, reactive strength index	3D accelerometer 3D gyroscope 3D magnetometer	custom-made MPU-9150 (Invensense)	range = ±16g; range = ±2000 deg/s; range = 1.2mT; resolution = 16, 16, 13 bit; sampling rate = 1KHz, 8KHzm, 100Hz	1000	1B	distal shank	strap/velcro	#	the developed wearable IMU device is a suitable tool for detecting relevant jumping parameters in a field-based diagnostic. It further supports online monitoring for a group of athletes
James DA, Leadbetter RI, Neeli MR, Burkett BJ, Thiel DV, Lee JB	An integrated swimming monitoring system for the biomechanical analysis of swimming strokes	10.1080/19346182.2012.725410	2011	Sports Technology	swimming	freestyle swimming	to develop a system to monitor body segment movements for the detection of swim stroke characteristics	internationally ranked triathlete	1F	in field	arm stroke identification, stroke rate	#	3D accelerometer 3D gyroscope	custom-made	dimensions = 52 x 33 x 11mm^3 range = ±8g; range = ±1500deg/s	100	3B	on the posterior side of the distal end of the forearm, S1 of the sacra (lower back) and anterior aspect of the mid shank (lower leg)	NS	video camera	by better understanding athlete performance in the competitive environment, coaches can more effectively work with athletes to improve their performance
Janssen I, Sachlikidis A	Validity and reliability of intra-stroke kayak velocity and acceleration using a GPS-based accelerometer	10.1080/14763141003690229	2010	Sports Biomechanics	kayak	kayak (3 sessions for a day, 3 stroke rates)	to assess the validity and reliability of the velocity and acceleration measured by a kayak-mounted GPS-baed accelerometer units compared to the video-derived measurements and the effect of satellite configuration on velocity	skilled	1M	in field	#	boat instantaneous velocity and acceleration	3D accelerometer 3D gyroscope 3D magnetometer	Minimax (Catapult)	range = ±2g, = ±6g; gyro freq = 100Hz magn freq = 30Hz	100	4E	kayak	#	GPS 5 Hz	highlight the need for sporst utilising GPS-based accelerometers to conduct sport-specific validity and reliability studies to ensure accuracy of their data
Jarning JM, Mok KM, Hansen BH, Bahr R	Application of a tri-axial accelerometer to estimate jump frequency in volleyball	10.1080/14763141.2015.1027950	2015	Sports Biomechanics	volleyball	training protocol consisting of seven typical motion patterns (including jumping and non-jumping movements)	to investigate the possibility of using peak vertical acceleration (PVA) or peak resultant acceleration (PRA) to estimate jump frequency	elite	12M	in field	#	jump frequency	3D accelerometer	ActiGraph GT3X (ActiGraph)	range = ±6g	100	1B	midline of the lumbosacral region with a specific vertical orientation	belt strapped around waist		neither peak vertical acceleration nor peak resultant acceleration measured by a tri-axial accelerometer is an applicable method for estimating jump frequency in volleyball
Jensen U, Schmidt M, Hennig M, Dassler FA, Jaitner, T, Eskofier BM	An IMU-based mobile system for golf putt analysis	10.1007/s12283-015-0171-9	2015	Sports Engineering	golf	1. three putts from three different distances (1.5 m, 3 m, 5 m) with two different putters 2. one putt length (3 m) and one putter pre and post training	to introduce an alternative approach for a pervasive real-time golf putt data analysis system	completely inexperienced	a. 15M b.11M	in field	phases duration	putt detection and characterization for training progress in motor learning (club linear and angular kinematics)	3D accelerometer 3D gyroscope	SPI-Pro X II (GPSports)	mass = 22g; dimensions = 53 x 32 x 25mm^3; range = ±1.5 g; range = ±500 deg/s	256	1E	on the club head	#	#	1) putts are automatically detected with high probability if a basic swing model is followed; 2) the training progress analysis revealed learning progress and instants in learning where progress changes
Jidovtseff B, Croisier JL, Lhermerout C, Serre L, Sac D, Crielaard JM	The concept of iso-inertial assessment: reproducibility analysis and descriptive data	#	2006	Isokinetics and Exercise Science	overload training	bench press and squat	to test sensor without and with human variability during bench press and squat lifting at the Smith machine	recreational	16M	in field	#	average and peak velocity (cable) and power (acceleration), time to peak power	1D accelerometer	custom-made 3140 (ICS Sensors)	NS	1000	2E	on the extremity of the barbell	NS	cable-extension position transducer (model PT5DC, Celesco, USA)	monitoring force-velocity and force-power relationships offers an original functional approach in strength training supervision
Jones IC, Miller DI	Influence of Fulcrum position and springboard response and takeoff performance in the running approach	10.1123/jab.12.3.383	1996	Journal of Applied Biomechanics	diving	jump takeoffs from a 1-m springboard with the fulcrum at preferred settings and forward and backward (0.144m)	to investigate kinematic responses of the springboard tip and divers'lower extremities to alterations in fulcrum settings	US national team	10M, 10F	in field	#	acceleration	1D accelerometer	custom-made PiexoBEAM (Kistler)	range = ±50g; sensitivity = 101.5mV/g ; resonant frequency = 26.8kHz	500	1E	tip of springboard	tape	video	accelerometer output in the absence of video was not beneficial as a means of provideing immediate performance feedback for coaching purpose
Kawabata M, Goto K, Fukusaki C, Sasaki K, Hihara E, Takahiro Mizushina T, Ishii N	Acceleration patterns in the lower and upper trunk during running	10.1080/02640414.2013.805884	2013	Journal of Sports Sciences	running	treadmill and over ground running (2 trials each) treadmill: running for 3 min at self, slow and fast speed overground: running for 100m at self, slow and fast speed	a. to relate 3D acceleration patterns of the lower and upper trunk to running gait cycle; to assess the validity of stride duration estimated from acceleration patterns b. to investigate speed-dependent changes in acceleration; to examine the test–retest reliability of these parameters	healthy young	13M	in field	stride duration	acceleration amplitude (peak to peak) and acceleration root mean square (both calculated for each acc component)	3D accelerometer	custom-made LSM303DLH (STMicroelectronics)	mass = 44.5g; dimensions (in small plastic box) = 84× 15× 40mm^3; range = ±8g; 4.0mg sensitivity	100	2B	lower trunk (L3) upper trunk (ensiform process)	elastic belt + highly adhesive surgical tape	#	no performance evidence is shown; acceleration amplitude and acceleration root mean square are significantly affected by condition (tradmill vs over ground), site (lower vs upper trunk) and speed (slow, self, fast)
Keaney E, Withers S, Parker-Simmons S, Gastin P, Netto K	The training load of aerial skiing	10.1080/24748668.2016.11868919	2016	International Journal of Performance Analysis in Sport	aerial skiing	front and back somersault (sagittal plane) performed off three different ramps with a take-off angle of 15°, 25° and 45°	to quantify the training load experienced by elite aerial skiers	elite	9F	in field	#	peak impact on landing	3D accelerometer	SPI-Pro (GPSports)	NS	100	1B	between participants’ shoulder blades in the upper thoracic spine region	harnesses	heart rate transmitters (Polar Electro)	landing impacts significantly higher (p ≤ 0.001) when participants jumped off ramps with a larger take-off angle or when they completed jumps with a mid-air rotation
Kelly D, Coughlan GF, Green BS, Caulfield B	Automatic detection of collisions in elite level rugby union using a wearable sensing device	10.1007/s12283-012-0088-5	2012	Sports Engineering	rugby	physical collisions in rugby training	to develop a reliable movement analysis model, utilising pattern recognition techniques, to automatically detect player tackles and load using wearable sensing devices	elite club and international (league)	M	competition	#	peak acceleration vector magnitude	3D accelerometer	SPI Pro (GPSports Systems)	NS	100	1B	between the shoulder blades overlying the upper thoracic spine	integrated into a purpose built harness	GPS 5 Hz	automated collision analysis is possible by utilising accelerometer signals received from a single sensor, worn on the player, to build a tackle modeling system and can be utilised to monitor player wellbeing, develop injury management protocols and return to play criteria for individual players and teams
Kelly P, Ó Conaire C, O' Connor NE, Hodgins J	Motion synthesis for sports using unobtrusive lightweight body-worn and environment sensing	10.1111/cgf.12143	2013	Computer Graphics Forum	tennis	all the major tennis shots	to present a highly portable, non-intrusive approach for synthesizing human athlete motion in competitive game-play with lightweight instrumentation of both the athlete and field of play	Tennis Ireland athletes	NS	laboratory	#	motion synthesis	3D accelerometer	NS	range = 6 ±12g	NS	6B	one on each forearm, each shin, one on the lower back and one on the chest	#	Vicon (12 cameras)	#
Kempton T, Sullivan C, Bilsborough JC, Cordy J, Coutts AJ	Match-to-match variation in physical activity and technical skill measures in professional Australian football	10.1016/j.jsams.2013.12.006	2015	Journal of Science and Medicine in Sport	Australian football	31 matches of Australian Football League	a. to determine the match to match variability in physical activity and technical performance measures in Australian football b. to examine the influence of playing position, time of season and different seasons on these measures of variability	elite	33M	competition	#	PlayerLoad (3D jerk)	3D accelerometer 3D gyroscope 3D magnetometer	MinimaxX S2 (Catapult)	NS	NS	1B	vest	customized vest designed to minimize movement between the device and the body	GPS 10 Hz	while global measures of physical performance are relatively stable, higher-speed activities and technical measures exhibit a large degree of between-match variability in Australian Football. However, these measures remain relatively stable between positions, and within and between Australian Football League seasons
King k, Hough K, McGinnis R, Perkins NC	A new technology for resolving the dynamics of a swinging bat	10.1007/s12283-012-0084-9	2012	Sports Engineering	baseball	bat swing	a. introduce a novel measurement method for the sports of baseball and softball (inexpensive and highly portable bat swing analysisi system) for use right on the field of play. b. reveal new and important features of the bat motion	recreational	1 (gender NS)	in field	#	bat position and orientation, linear velocity	3D accelerometer 3D gyroscope	NS	range = 18g; range = 2000deg/s	400	1E	knob end of the bat	housed in a plastic case	#	the analysis yelds a near-instantaneous and highly resolved summary of three-dimansional bat dynamics
King K, Perkins NC, Churchill H, McGinnis R, Doss R, Hickland R	Bowling ball dynamics revealed by miniature wireless MEMS inertial measurement unit	10.1007/s12283-010-0054-z	2011	Sports Engineering	bowling	ball throwing	to build a sensorized ball to study bowling ball dynamics	professional	1 (as an example)	in field	phase analysis, revolution rates, peak times	measured linear and angular acceleration; estimate of ball velocity and of ball friction	3D accelerometer 3D accelerometer 2D gyroscope	custom-made	mass = 4.5g; size = 19 x 24mm^2	1000	1B	inside a modified thumb slug	inserted in a ball hole	#	tool for assessing bowler skill and ball performance. The IMU accurately measures the spin dynamics of the ball which are crucial to develop the ball ‘‘hook.’’ An analysis of ball dynamics in the lane is distilled to a measurable ‘‘hook potential’’ metric for further assessing bowler skill
King K, Yoon SW, Perkins NC, Najafi K	Wireless MEMS inertial sensor system for golf swing dynamics	10.1016/j.sna.2007.08.028	2008	Sensors and Actuators A	golf	swing	to describe the design and performance of a miniature and wireless six degree-of-freedom inertial measurement unit for measuring the dynamics of a golf swing	NS	NS	laboratory	#	club face orientation and club head velocity and position	3D accelerometer 3D gyroscope	NS	total continuous current draw: 37mA total assembled mass: 25.1g	NS	1E	in the shaft	in the shaft	#	#
Kirk C, Hurst HT, Atkins S	Comparison of the training loads of mixed martial arts techniques in isolated training and open sparring	10.5604/20815735.1174226	2015	Journal of Combat Sports and Martial Arts	mixed martial arts	isolated and sparring strikes (jabs , crosses , left and right hooks, leg and body kicks), takedowns	to record and compare the intensities of different mixed martial arts specific movements in training and sparring to determine if any differences exist between training and competition	trained competitors	8M	in field	#	PlayerLoad (3D jerk)	3D accelerometer	Minimax X3 (Catapult)	NS	100	1B	worn on the torso at the T3-4 vertebrae	neoprene harness secured in place using duct tape	#	measures of PlayerLoad highlight which of several MMA related skills would cause the greatest increases in intensity in isolated skills training and in open sparring. This provides a database for coaches to use as a guide to plan training sessions to meet the optimum intensity. It also demonstrates that any session that includes takedowns will increase the intensity significantly and that techniq…
Kirk C, Hurst HT, Atkins S	Measuring the workload of mixed martial arts using accelerometry, time motion analysis and lactate	?	2015	International Journal of Performance Analysis in Sport	mixed martial arts	simulated competition	to determine the external load of mixed martial arts bouts using accelerometers and time motion analysis	trained competitors	6M	in field	#	PlayerLoad (3D jerk)	3D accelerometer 3D gyroscope	Minimax X3 (Catapult)	NS	100	1B	worn on the torso at the T3-4 vertebrae	neoprene harness secured in place using duct tape	#	mixed martial arts was proved to be an exertive sport that causes greater workloads than non-contact sports and comparable workload to contact team sports. Mixed martial arts fighter’s energetics may more closely match those of striking based athletes as opposed to grappling based ones. PlayerLoad can be used to inform training load in mixed martial arts
Kobsar D, Osis ST, Hetting BA, Ferber R	Classification accuracy of a single tri-axial accelerometer for training background and experience level in runners	10.1016/j.jbiomech.2014.04.017	2014	Journal of Biomechanics	running	subjects ran on an instrumented treadmill (Bertec, Columbus, OH) for 2min to acclimatize, and then 15s of accelerometer data were collected equating to approximately 20–25 footfalls	to utilize a single tri-axial accelerometer and determine whether we can classify runners of different training backgrounds and expeience levels according to their patterns of motion	a. competitive soccer players b. first-time marathon runners c. experienced marathon runners	a. 14F b. 16F c. 12F	laboratory	#	acceleration in vertical, mediolateral, anteroposterior and resultant. Regularity of steps and stride define the symmetry. (step duration, stride duration, ground reaction force)	3D accelerometer	G-Link (Microstrain)	range = ±10g; resolution = 9mg	617	1B	lower back (L3 vertebra)	semi-rigid elastic straps	#	variables relating to the vertical,symmetry,and regularity components of accelerations near the centre of mass appear to be effective predictors of training background, and gait speed remains an important classifier of both training background and experience level. With Speed, the accelerometer correctly classified 96% of runners for both training background and experience level. Without Speed, t…
Koda H, Sagawa K, Kuroshima K, Tsukamoto T, Urita K, Ishibashi Y	3D measurement of forearm and upper arm during throwing motion using body mounted sensor	10.1299/jamdsm.4.167	2010	Journal of Advanced Mechanical Design, Systems, and Manufacturing	baseball	pitching	to estimate the trajectory and orientation (kinematics) of the forearm and the upper arm using inertial sensors	healthy (2 with baseball career for 3 yrs as outfielder)	5M	laboratory	#	trajectory of shoulder, elbow and wrist	3D accelerometer 3D gyroscope	custom-made (Analog Devices) custom-made (Murata and Microstone)	mass = 93 g; dimensions (plastic box) = 50× 75× 30mm^3 ;2 kind of acc: ± 5 g and ± 120 g; 2 kind of gyro: ± 300 deg/s and ± 4000 deg/s	1000	2B	forearm and upper arm	velcro	release sensor	#
Koshida S, Urabe Y, Miyashita K, Iwai K, Kagimori A	Muscular outputs during dynamic bench press under stable versus unstable conditions	10.1519/jsc.0b013e31817b03a1	2008	Journal of Strength and Conditioning Research	overload training	bench press	to demonstrate the changes in muscular outputs during dynamic resistance exercise under stable/unstable conditions	college	20M	NS	#	peak power, force and velocity	1D accelerometer	Myotest	mass = 50g; dimensions = 85 x 55 x 17mm^3	500	1E	center of the barbell shaft	NS	#	measurement of power output with an accelerometer was confirmed to be reliable and versatile (as in Thompson et al, 1999)
Križaj D, Èuk I	Can miniature accelerometers attached to the gymnastics springboard be used for take-off analysis?	#	2015	Science of Gymnastics Journal	artistic gymnastics	jumps onto the springboard	to present an investigation of vault characteristics during the jump and takeoff from the springboard using miniature accelerometer(s) attached onto the springboard	NS	1 (gender NS)	laboratory	time to maximal desk compression, time to reach maximum velocity	acceleration, velocity and displacement of the springboard	2D accelerometer	custom-made ADXL305	range = 5g	1000	1E	placed on the top of springboard	#	#	MEMS accelerometers can be used for analysis of the take-off from the springboard. Appropriate filtering of the data is performed before parameters extraction
Kruger A, Edelmann-Nusser J	Biomechanical analysis in freestyle snowboarding: application of a full-body inertial measurement system and a bilateral insole measurement system	10.1002/Jst.89	2009	Sports Technology	snowboarding	test run (?), single test run (360° indie grab)	a. to assess the accuracy of a commercially-available IMU system in a field-based setting b. to assess the accuracy of a bilateral insole measurement system againstr a laboratory-based force plate c. to collect and analyze data with these systems during the 'on-snow' preformance in order to provide important biomechanical information necessary for the development of enhanced snowboarding equipment	experienced recreational snowboarder	1M	in field	#	knee angle	3D accelerometer 3D gyroscope 3D magnetometer	Moven (Xsens)	NS	120	16B	NS	sensors placed in the suit	GPS 20 Hz (GPS1200, Leica Geosystem, Heerbrugg, Switzerland), bilateral insole (T&T Medilogic, Schonefeld, Germany)	the measured data reveal ankle jiont angles and loads which have the potential to cause injuries
Krüger A, Edelmann-Nusser J	Application of a full body inertial measurement system in alpine skiing: a comparison with an optical video based system	10.1123/jab.26.4.516	2010	Journal of Applied Biomechanics	skiing (alpine skiing)	test-run on a well prepared slope	to determine the accuracy of a full body inertial measurement system for the application in alpine skiing in comparison with an optical video based system	ski instructor	1M	in field	#	knee angle, the tilting angle, and the speed of the knee joint	3D accelerometer 3D gyroscope 3D magnetometer	Moven (Xsens)	total mass equipment = 5.5kg (GPS antenna on the helmet = 450g)	120	16B	boots, lower legs, upper legs, pelvis, shoulders, head, upper arms, forearms and hands	suit (data loggers and power supplies of both systems were stored in a back pack worn by the athlete)	GPS 20 Hz (GPS1200, Leica Geosystems, Switzerland)	it is reported that: the knee angle, the tilting angle, and the speed of the knee joint were analyzed. Several studies show the relevance of these parameters with regard to biomechanical analyses in alpine skiing (Krüger et al., 2007; Michahelles & Schiele, 2005; Raschner et al., 2001)
Krüger A, McAlpine P, Borrani F, Edelmann-Nusser J	Determination of three-dimensional joint loading within the lower extremities in snowboarding	10.1177/0954411911426938	2011	Journal of Engineering in Medicine	snowboarding	runs on a slope with 11-13 turns	to develop a method to determine net joint moments within the lower extremities in snowboarding for complete measurement runs	experienced	1M	in field	#	net joint moments (ankle, knee, hip)	3D accelerometer 3D gyroscope 3D magnetometer	Moven (Xsens)	total mass = 1.93kg	120	17B	boot, leg, thigh, pelvis, shoulder, sternum, head, upper arm, forearm, hand (L,R)	straps	2 custom-made force plates mounted between the board and the bindings (200 Hz)	useful to compare different snowboarding techniques as well as different snowboard equipment on the same subject
Laffaye G, Collin JM, Levernier G, Padulo J	Upper-limb power test in rock-climbing	10.1055/s-0033-1358473	2014	International Journal of Sports Medicine	rock climbing	arm-jump board test	to validate a new ecological power-test on athletes of diff erent levels and to assess rock climbers’ profiles (novice vs skilled vs elite and boulderers vs route climbers)	novice skilled elite	10 11 13 (gender NS)	in field	#	vertical displacement of the centre of mass, total duration of the arm jump, maximal velocity, peak power, index of efficiency	3D accelerometer	Myotest	mass = 60g; dimensions = 95 x 50 x 10mm^3	500	1B	middle of the lower back	elastic belt	video	statistical differences in vertical displacement among all three groups (novice, skilled, and elite) the higher the score of the arm-jump test (vertical displacement), the greater the climbing ability
Le Bris R, Billat V, Auvinet B, Chaleil D Hamard L, Barrey E	Effect of fatigue on stride pattern continuously measured by an accelerometric gait recorder in middle distance runners	#	2006	The Journal of Sports Medicine and Physical Fitness	running (distance running)	track running test to exhaustion at maximal aerobic speed	to detect early changes in gait variables during an exhaoustive running bout at maximal aerobic speed	sub-elite middle distance	6M	in field	stride frequency, stride symmetry and regularity	signal energies and impulses and integral of the total acceleration vector	3D accelerometer	Locométrix	mass = 20g; capacitive; dynamic range 0-1000mT	100	1B	medial lumbar region	semi-elastic belt	#	the changes in medio-lateral axis and in the regularity index could be considered as early alterations of running patter when teh athletes got fatigued
Le Sage T, Bindel A, Conway PP, Justham LM, Slawson SE, West AA	Embedded programming and real-time signal processing of swimming strokes	10.1007/212283-011-0070-7	2011	Sports Engineering	swimming	front crawl, backstrtoke, breaststroke, butterfly	propose and validate an embedded programming and real-time signal processing of swimming strokes	elite	4 (gender NS)	in field	stroke rate, stroke time, lap duration	#	3D accelerometer 2D gyroscope	custom-made ADXL330 (Analog Devices) custom-made IDG300 (IvenSense)	mass=110g; dimensions = 150 x 90 mm^2; resolution = 10-bit	25	1B	back	#	#	real-time processing, transmission and presenattion of data to swimming coaches using wearable wireless sensor was achieved, the system significantly reduces the time for processing acquired data and has delivered a novel monitoring device suitable for operation within the harsh environment of the pool
Le Sage T, Conway P, Cossor J, Slawson S, West A	A wireless sensor system for monitoring the performance of a swimmer’s tumble turn	10.1177/1754337112467881	2013	Proceedings of the Institution of Mechanical Engineers, Part P: Journal of Sports Engineering and Technology	swimming	tumble turn	to use and validate wireless sensor networks for determining performance parameters pertaining to the swimmer’s tumble turn	national	1F	in field	rotation time, wall contact time, glide time, first kick time upon turn completion, first stroke time upon turn completion	body orientation, velocity of the swimmer throughout the turn)	3D accelerometer 3D gyroscope	accelerometer ADXL330 (AnalogueDevices) gyroscope LPR430AL (ST Microelectronics)	NS	25	1B	Lower back	NS	#	algorithms have been developed to allow automated determination of the time to key occurrences during the swimming turn based on inertial sensor data
Le Sage T, Conway P, Slawson S, West A	Development of a wireless sensor network for use as an automated system for monitoring swimming starts	10.1177/1754337112462945	2012	Proceedings of the Institution of Mechanical Engineers, Part P: Journal of Sports Engineering and Technology	swimming	swim start	to present and validate a methodology for utilising a wireless sensor network and associated algorithms to determine key performance parameters of the start	international	8M, 4F	in field	time to key occurrences (feet leaving the block, entry into the water, first kick), kick count and rate and stroke count and rate.	#	3D accelerometer 3D gyroscope	NS	NS	NS	1B	Lower back	Velcro strap	#	inertial sensors and its associated algorithms can be used as a reliable measure for automatically determining the main swim start times, stroke count, stroke rate and kick rate of the swimmer, with a sensitivity that is comparable to the system currently in use by international swimmers
Lee J, Leadbetter R, Ohgi Y, Thiel D, Burkett B, James DA	Quantifying and assessing biomechanical differences in swim turn using wearable sensors	10.1080/19346182.2012.725171	2011	Sports Technology	swimming	tumble turn	to present a proof of concept that inertial technology can detect the second rotation of the tumble turn action in freestyle swimming	elite	2 (gender NS)	in field	initiation of rotation, push off, 90° rotation	components of acceleration	3D accelerometer	NS	NS	100	1B	Lower back	NS	#	IMUs have the potential to detect swimmer rotations, thus they are a viable tool to assess tumble turn performance and providing an option for further research in turns and a feasible tool for coaches to improve athlete's performance
Lee JB, Mellifont RB, Burkett BJ	The use of a single inertial sensor to identify stride, step, and stance durations of running gait	10.1016/j.jsams.2009.01.005	2010	Journal of Science and Medicine in Sport	running (distance running)	low (10-12km/h), medium (13-15km/h) and high (16-19km/h) velocity runs	to determine the level of agreement between an inertial sensor and infrared camera based estimates of stride, step, and stance durations across a range of running speeds	elite	6M, 4F	laboratory	heel strike, toe off, stride, step and stance durations	#	3D accelerometer	MiniTraqua version1 (Cooperative Research Center for Micro-technology, Austalian Institute of Sport)	NS	100	1B	sacrum (S1)	secured by double sided tape directly to the skin-tight running suits. Elasticised bandage was wrapped around the waist.	#	#
Lee JB, Mellifont RB, Burkett BJ, James DA	Detection of illegal race walking: a tool to assist coaching and judging	10.3390/s131216065	2013	Sensors	race walking	series of legal, illegal and self-selected pace races	to determine whether an inertial sensor could improve accuracy, monitor every step the athlete makes in training and/or competition	race walkers	5M, 2F	in field	#	number of illegal steps	3D accelerometer	custom-made	NS (ref cited [17])	100	1B	directly on the skin over the S1 vertebra of the sacrum	NS (presumably double sided tape as the sensor was placed directly on the skin)	#	the ability to measure each step taken by an athlete suggests it may be possible that inertial sensors could be used as a tool to assist judges monitor Olympic and international race walking events + due to the unobtrusive nature of the sensor, the technology may also be used as a training tool for athletes. By wearing the device during training any illegal technique could be detected and subsequ…
Lee JB, Sutter KJ, Askew CD, Burkett BJ	Identifying symmetry in running gait, using a single inertial sensor	10.1016/j.jsams.2009.08.004	2009	Journal of Science and Medicine in Sport	running (distance running)	5 min treadmill running at three different speed: self selected, plus 1 km/h and minus 1 kn/h (acquisitions only 15 s during the last minute = 8 steps)	a. to validate, against segmental motion analysis, the use of a single inertial sensor (applied as a sacral marker) to measure the COM vertical accelerations, for the left and right steps independently, during running b. to determine if a change in running intensity had any effect on COM vertical acceleration or the symmetry of COM between the left and right steps	national standard athletes (minimum of 2 years competition and training experience)	6M, 4F	laboratory	#	centre of mass acceleration; symmetry ratio of acceleration = (left−right) / left; t-test between the left and right magnitude of the COM vert acc	3D accelerometer	MiniTraqua version1 (Cooperative Research Center for Micro-technology, Austalian Institute of Sport)	mass = 21g; dimensions = 52 × 33 × 10 mm^3	100	1B	sacrum (S1)	double-sided tape directly to the athlete’s tight-fitting running suits + secured with elasticised bandage that was wrapped over the sensor and around the waist	#	#
Leite MAFDJ, Sasaki JE, Lourenço CLM, Zanetti HR, Cruz LG, Mota GRD, Mendes EL	Medicine ball throw test predicts arm power in rugby sevens players	10.5007/1980-0037.2016v18n2p166	2016	Rev Bras Cineantropom Desempenho Hum	overload training	pull at the bench press	to develop an upper limb muscle power (PUL) prediction model using the Medicine Ball Throw Test (MBT) in rugby players	recreational	11M, 7F	in field	#	power (through estimated speed variation and applied force and torque, concentric phase)	3D accelerometer	Myotest (model S4P, Sion)	NS	NS	1E	placed on the bar between the shoulder and thumb of the right hand and held upright	#		the MBT (Medicine ball Throw test) test has high correlation with actual PUL (upper limb muscle power) modelvalues and it was found that the equation developed in this study has high accuracy to predict PUL in rugby players of both sexes
Lesinski M, Muehlbauer T, Granacher U	Concurrent validity of the Gyko inertial sensor system for the assessment of vertical jump height in female sub-elite youth soccer players	10.1186/s13102-016-0061-x	2016	BMC, Sport Science, Medicine, Rehabilitation	jump	countermovement and squat jumps	to verify concurrent validity of the Gyko inertial sensor system for the assessment of vertical jump height	sub-elite youth	19F	in field	#	jump height	3D accelerometer 3D gyroscope 3D magnetometer	Gyko (Microgate)	mass = 35g; dimensions = 50 x 70 x 20mm^3; range = 8g	500	1B	waist level on the back of the body	proper Velcro elastic belt	#	the correction equations to estimate vertical jump height for the force-plate and the Optojump system from Gyko-derived data
Lin SP, Sung WH, Kuo FC, Kuo TBJ, Chen JJ	Impact of center-of-mass acceleration on the performance of ultramarathon runners	10.2478/hukin-2014-0109	2014	Journal of Human Kinetics	running	running test in level-surface, speeds were set at 3, 6, 8, 9, and 12 km/h, with each stage lasting 5 min and with a 2 min rest interval between each stage	to use a triaxial accelerometer to compare the three-dimensional center-of-mass accelerations of two groups of ultramarathon runners with distinct performances during different running speeds and distances	a. elite ultramarathon b. sub-elite ultramarathon	a. 5M b. 5M	laboratory	#	acceleration in the 3 axis	3D accelerometer	custom-made ADXL330 (Analog Devices)	mass = 10g; dimensions = 52 x 32 x 6mm^3; range = ±3g	500	1B	at the intersection where the anterior superior iliac spine line connected with the vertebrae	by using a highly cohesive, comfortable, and air-permeable Kinesio tape (Kinesio Holding Co)	gas analysis	runners should reduce their stride length, increase their cadence, and strengthen their lower extremity press force
Lin S-P, Sung W-H, Kuo TB-J, Chen J-J	Development and application of gravity acceleration measurement in running kinematic analysis	#	2015	ICIC Express Letters	running	level-surface progressive intensity running on a treadmill	to develop a miniature wireless movement signal recording system for running gait analysis	elite	2M	laboratory	#	acceleration components	3D accelerometer	ADXL330 (Analog Devices)	mass = 8.6g; dimension = 52 × 35 × 12mm^3; range = ±3g; resolution = 12-bit	500	1B	at the height of the human body’s centre of mass	NS	#	the direct measurement of triaxial acceleration is sufficiently capable of differentiating some of the technical abilities of ultramarathon runners
Lindsay T, Yaggie J, McGregor S	A wireless accelerometer node for reliable and valid measurement of lumbar accelerations during treadmill running	10.1080/14763141.2015.1123760	2016	Sports Biomechanics	running	treadmill running	to investigate the reliability of a wireless accelerometer and its agreement with optical motion capture for the measurement of root mean square acceleration during running	college-age participants	11M, 4F	laboratory	#	root mean square of acceleration	3D accelerometer	custom-made ADXL 210 (G-Link)	mass = 47g; dimensions = 58 x 43 x 21mm; range = ±10g	617	1B	L5 vertebra (from figure)	mounted to a semi-rigid strab and secured with elastic wrap	#	the wireless accelerometer node provides repeatable and valid measurement compared with the standard laboratory method of optical motion capture
Lindsay TR, Noakes TD, MCGregor SJ	Effect of treadmill versus overground running on the structure of variability of stride timing	10.2466/30.26.PMS.118k18w8	2014	Perceptual and Motor Skills	running (distance running)	treadmill and on indoor track running: 8 min for each condition	to compare gait timing dynamics of treadmill and overground running	trained	9M	in field	stride time	dynamics of stride series (strength of correlation among the series points): mean, standart deviation, coefficient of variation%, detrended fluctuation analysis, power spectral density, multiscale entropy	3D accelerometer	316-10 G (Noraxon)	mass = 20g	2000	1E	top of running shoe	NS	#	treadmill running results in stronger correlations and more regular stride timing dynamics compared to overground running; this diff erence appears to be greater at non-preferred speeds
Little C, Lee JB, James DA, Davison K	An evaluation of inertial sensor technology in the discrimination of human gait	10.1080/02640414.2013.779739	2013	Journal of Sports Sciences	running	normal walking, fast walking, and running	a. to determine whether temporal gait event (specifically heel strike) measures of normal walking, fast walking, and running can be discriminated between using acceleration data; b. to determine whether these temporal measures vary between treadmill and overground gait	recreational	6M, 6F	in field	heel strike	#	3D accelerometer	MiniTraqua Version 1 (Cooperative Research Centre for Microtechnology, Australian Institute of Sport)	NS	100	1B	sacrum (S1)	double sided tape directly to the participant’s skin; minimisation of unwanted sensor movement was carried out using elasticised bandage wrapped around the waist and over the sensor	#	data collected with triaxial accelerometers may be able to differentiate gait types thereby allowing better estimation of energy expenditure in large population studies rather than relying solely on step count as this technology is typically used
Llosa J, Vilajosana I, Vilajosana X, Navarro N, Suriñach, Marquès JM	REMOTE, a wireless sensor network based system to monitor rowing performance	10.3390/s90907069	2009	Sensors	rowing	rowing on ergometer and on water	to assess the performance of REMOTE, a sensor network based application that provides a detailed picture of a boat movement, individual rower performance, or his/her performance compared to other crew members. Laboratory calibration to validate theory, ergometer tests to set the acquisition parameters, and on boat tests to show the application potential	experienced and not experienced	2M	in field	#	Boat forward movement (m) and balancing (roll deg) Stroke angle and trajectory. Oar acceleration and velocity	3D accelerometer	custom-made LIS3L02AS4 (ST Microelectronics)	NS	83	2E	oars and boat	embedded in oars and boat	#	#
Lomond KV, Turcotte RA, Pearsall DJ	Three-dimensional analysis of blade contact in an ice hockey slap shot, in relation to player skill	10.1007/BF02844206	2007	Sports Engineering	ice hockey	slap shot	to examine the three-dimensional movement profile of the blade during a stationary slap shot, as a function of player skill level	elite recreational	8M 7M	laboratory	blade-puck contact time	#	1D accelerometer	ACH-01 (Measurement Specialties)	mass (accelerometer + puck) = 0.160kg	10000	1E	mounted within a standard ice hockey puck to identify initial puck–blade contact with respect to blade kinematic data	the centre of the puck was drilled out to accommodate the sensor and a thin metal cover was attached	2 uni-axial force plates; 2 high-speed video cameras (1000 Hz); radargun for puck velocity	slap shot performance is primarily classified on the basis of puck velocity; within the rocker phase, elite shooters tended to alter timing parameters (i.e. phase length), magnitude of linear variables (i.e. displacement, velocity and acceleration) and the overall blade orientation that may correspond to higher puck velocity
Losnegard T, Myklebust H, Skattebo Ø, Stadheim H, Sandbakk Ø, Hallén J	The influence of pole length on performance, O2 cost, and kinematics in double poling	10.1123/ijspp.2015-0754	2017	International Journal of Sports Physiology and Performance	cross-country skiing	submaximal roller-ski test on treadmill + 1000-m self-paced time trial in double poling (cross-country ski)	to investigate how pole length influences DP performance, O2 cost, and kinematics during treadmill roller skiing	international national highly trained regional	2M 2M 5M	in field	cycle time (time between right-pole plants), poling time (time between a pole plant and subsequent pole lift-off); reposition time (time between pole lift-off and subsequent pole plant)	#	accelerometer	PLUX Wireless Biosignals	NS	NS	1B	mounted on the skier (NS where exactly)	NS	video camera for 2D kinematic analysis	1000-m time, submaximal O2 cost, and CoM vertical range of displacement were reduced in competitive cross-country skiers using poles 7.5 cm longer than self-selected ones; less up-and-down movement of the CoM during the cycle may be beneficial in terms of reducing O2 cost and improving performance during double poling
Lovell TWJ, Sirotic AC, Impellizieri FM, Coutts AJ	Factors affecting perception of effort (session rating of perceived exertion) during rugby league training	10.1123/ijspp.8.1.62	2013	International Journal of Sports Physiology and Performance	rugby	training program in preseason and in season	to correlate body load with session rating of perceived exertion (sRPE) supporting the validiy of the latter for monitoring training intensity in rugby league.	professional league	32M	in field	#	impact measures and body load (square root of the sum of squared instantaneous rate of change in acceleration along the 3 axes)	3D accelerometer	T14 Polar-SPI Pro (GPSports)	NS	100	NS	NS	NS	heart rate, GPS 5Hz	#
Lowery RP, Joy JM, Brown LE, Oliveira De Souza E, Wistocki DR, Davis GS, Naimo MA, Zito GA, Wilson JM	Effects of static stretching on 1-mile uphill run performance	10.1519/JSC.0b013e3182956461	2014	Journal of Strength and Conditioning Research	running (distance running)	ran for 1 minute at an 11.3 km/h pace with a 5% incline	to investigate the effects of static stretching on 1-mile uphill run performance, electromyography (EMG), ground contact time (GCT), and flexibility	college	10 M	laboratory	heel strike, toe off	#	1D accelerometer	Trigno Wireless EMG Systems (Delsys)	range = ± 5g; resolution = 16-bit	1024	1B	top of the shoe of the dominant leg	plastic ties to the shoelaces	EMG (the belly of the lateral head of the gastrocnemius of the dominant leg)	the study findings indicate that static stretching decreases performance in short endurance bouts (;8%) while increasing GCT and muscle activation; coaches and athletes may be at risk for decreased performance after a static stretching bout--> static stretching should be avoided before a short endurance bout
Luteberget LS, Spencer M	High-intensity events in international women's team handball matches	10.1123/ijspp.2015-0641	2017	International Journal of Sports Physiology and Performance	handball	9 international handball matches	to profile high-intensity events (HIEs) in international women's team handball matches with regard to playing positions	national level	20F	competition	#	PlayerLoad™ (jerk), accelerations, changes of direction, decelerations (high-intensity events), obtained from MIMU data analysis	3D accelerometer 3D gyroscope 3D magnetometer	OptimEye S5 (Catapult)	NS	100	1B	between the shoulder blades	in a custom-made vest (Catapult Sports, Australia) worn under the player’s match jersey.	#	#
Macdermid P, Fink PW, Stannard SR	Transference of 3D accelerations during cross country mountain biking	10.1016/j.jbiomech.2014.03.024	2014	Journal of Biomechanics	cycling	one lap cross country track (26" and 29" wheels)	to describe the relationship between vibration mechanics and their interaction with terrain, bicycle and rider during a race pace effort on a cross country mountain bike track on both 26" and 29" wheels	nationally competitive	8 (gender NS)	in field	#	root mean squares of total (XYZ), vertical (Z), and horizontal (X,Y) accelerations (to quantify vibration) and spectral analysis.	3D accelerometer 3D gyroscope 3D magnetometer	Emerald (APDM)	data sheet accuracy	128	6B	handlebar center, lower left arm, left lower leg, seat post, lumbar region of lower back and medial forehead	NS	Power output (W), cadence (rpm), speed (km/h), and heart rate (bpm) (SRAM QUARK S2275 MTB Power Metre, USA; Garmin, Edge 500, USA) and GPS	stress were greates during downhill sections as acceleration differences bewteeen locations were greater when compared to uphill sections, and thus possibily prevent the recovery processes that may occur during non-propulsive load
Macdermid PW, Fink PW, Stannard SR	The effects of vibrations experienced during road vs. off-road cycling	101055/s-0034-1398534	2015	International Journal of Sports Medicine	cycling	road cycling	to compare the effects of vibrations experienced during offroad and road cycling	national competitors	7 (gender NS)	in field	#	accelerations, vibrations	3D accelerometer	Emerald (APDM)	NS	#	4B, 1E	lower left arm (frontal distal position); left lower leg (frontal, distal position); seat post (within 10 cm of saddle-rider contact area); lumbar region of lower back; and medial forehead	NS	cycle ergometer (Lode Excalibur Sport, NL); heart rate (Polar Electro, Kempele, Finand); breath-by-breath system (K42b, Cosmed, Italy)	riding at the same speed over an identical distance, on a track of the same gradient, but differing in surface (tar-sealed vs. offroad single track) caused participants to experience greater vibrations at the bicycle level and points of contact between bicycle and body while riding off-road
Magnúsdóttir Á, Þorgilsson B, Karlsson B	Comparing three devices for jump height measurement in a heterogeneous group of subjects	10.1519/JSC.0000000000000464	2014	Journal of Strength and Conditioning Research	jump tests	squat jump	a. to compare the accuracy of KineJump to more commonly used devices b. to test if individual geometric parameters like foot length, leg length, height, or weight affect the difference in values from different measurement devices c. to evaluate if jump height affects the error of measurement for the 3 devices tested	from sedentary - well trained athletes	52M, 45F	in field	#	jump height	3D accelerometer	KineJump	range = ±6g; resolution = 12-bit	640	1B	waist level on the back of the body	NS	Vertec, Contact mat	KineJump has accuracy that is at least as good as the accuracy of the Vertec and contact mat, although the overall accuracy of all the methods was disappointing at typically 65 cm. The 3 jump height measurement devices can be used to evaluate performance in a diverse group of people, but considerable deviation from actual jump height is apparent, depending on the method of calculation
Marin-Perianu R, Marin-Perianu M, Havinga P, Taylor S, Begg R, Palaniswami M, Rouffet D	A performance analysis of a wireless body-area network monitoring system for professional cycling	10.1007/s00779-011-0486-x	2013	Personal and Ubiquitous Computing	cycling	cycling for one minute at each target pedaling cadence: 40, 60, 80, 100 and 120 rpm	a. to design a portable wireless system that can be used for real-time monitoring of lower-limb kinematics during cycling b. to analyse its accuracy compared to reference camera-based system c. to analyse the wireless communication characteristics and their influence on the system performance. d. to analyse the energy expenditure and show the feasibility of using battery-powered wireless sensor n…	commuting cyclists recreational professional	4M, 2F 1M, 1F 1M	laboratory	#	knee and ankle angles	3D accelerometer 3D gyroscope 3D magnetometer	ProMove platform	range = ±1.5 to 6g; range = ±500/s; range = 600mT	200	3B	middle thigh, upper shank, foot	straps thightened over the body segments (depicted in a picutre)	#	a portable wireless sensor network was developed that can be used for real-time monitoring of lower limb kinematics during cycling
Marsland F, Lyons K, Anson J, Waddington G, Macintosh C, Chapman D	Identification of cross-country skiing movement patterns using micro-sensors	10.3390/s120405047	2012	Sensors	cross-country skiing	skiing (four skating techniques and three classical techniques) on snow	to determine whether a single micro-sensor unit attached to the body could be used to identify effectively each of the main techniques used during cross.country skiing competition	international and national Australian athletes	6M, 2F	in field	raw data	#	3D accelerometer 3D gyroscope 3D magnetometer	MinimaxX S4 (Catapult)	range = ±6g; range = ±1000 deg/s	100 (magnetometer 30)	1B	upper back (5cm lower than the base of the neck)	carrying pouch sewn onto the back of a standard competition race bib	GPS 5Hz (Fastrax)	a combination of inertial sensor data enables the poling action to be identified clearly, as well as the skating and kicking actions on each side of the body. Cyclical movement patterns for each technique can be identified across a range of athletes of different ability at the same time as individual characteristics are obserbed
Mason BS, Rhodes JM, Goosey-Tolfrey VL	Validity and reliability of an inertial sensor for wheelchair court sports performance	10.1123/jab.2013-0148	2014	Journal of Applied Biomechanics	wheelchair tests	wheelchair sprint	to examine the suitability of an inertial sensor for accurately and reliably measuring speed across a range of fixed speeds reflective of the wheelchair court sports and under dynamic sprinting tasks	able-bodied subject with previous experience in wheelchair propulsion	1M	laboratory	#	average speed and peak speeds, time of peak speeds, acceleration, deceleration	3D gyroscope	custom-made ITG-3200 (Invensense)	mass = 10g; dimensions = 20 x 30 x 17mm^3; range = ±2000 deg/s; non linearity = 0.2% of the full range	50	1E	axle of the wheelchair wheel (sports wheelchair loaded with 40 kg during treadmill sessions to improve stability)	NS	#	#
Mattes K, Schaffert N	New measuring and on water coaching device for rowing	10.4100/jhse	2010	Journal of Human Sport & Exercise	rowing	rowing	to present a new measuring and on water coaching device for rowing	NS	NS	in field	stroke rate and number	boat velocity, propulsion	3D accelerometer	custom-made (Accrow)	dimensions = 98 x 64 x 34mm^3; range=±2g	50	1E	boat surface	velcro strip	GPS 4 Hz	accrow is well suited for the precise measuring of the boat motion in the frame of performance diagnostics of for scientific sutied in racing rowing
Mauch M, Rennbahn PAG, Rist HJ, Kaelin X	Reliability and validity of two measurement systems in the quantification of jump performance	#	2014	Schweizerische Zeitschrift für Sportmedizin und Sporttraumatologie	jump tests	squat jump	to assess the reliability and validity of two instruments measuring force, power, velocity, and jump height in squat jumps	border guards	41M, 2F	laboratory	#	jump height, velocity, force, power	3D accelerometer	Myotest	NS	NS	1B	waist	elastic belt	force plate	the study indicates that both devices provide reliable results for assessing force, power, velocity and jump height
McCurdy KW, Walker JL, Langford GA, Ku MR, Guerrero JM, McMillan J	The relationship between kinematic determinants of jump and sprint performance in division in women soccer players	10.1519/JSC.0b013e3181fb3f94	2010	Journal of Strength and Conditioning Research	jump tests	jumping (bilateral and unilateral countermovement vertical and horizontal jumps, bilateral 40-cm drop vertical jump, bilateral 40-cm drop horizontal jump, unilateral countermovement vertical jump UCV), unilateral countermovement horizontal jump, unilateral 20-cm drop vertical jump (UDV), and unilateral 20-cm drop horizontal jump (UDH)) running	to investigate the relationship between kinematic measures of various vertical and horizontal jumps and sprint time, step length, and step frequency in femal college soccer players	NCAA Division 1	15F	in field	sprint time, average step length and frequency	jump height	3D accelerometer	NS	NS	NS	1B	waist	belt	electronic timing gate system (Inform Sport Training Systems, Victoria, BC, Canada)	unilateral jumps produced a stronger relationship with sprint performance
McGinnis RS, Cain SM, Davidson SP, Vitali RV, Perkins NC, McLean SG	Quantifying the effects of load carriage and fatigue under load on sacral kinematics during countermovement vertical jump with IMU-based method	10.1007/s12283-015-0185-3	2016	Sports Engineering	jump tests	countermovement jump	to establish the validity of the IMU-derived sacral kinematics, and investigation of the effects of fatigue and load carriage on sacral kinematics during the countermovement jump	a. university students b. army ROTC	a. 9M, 7F b. 15M, 6F	in field	#	maximum vertical displacement, min and max vertical velocity, average vertical accelerations at key events	3D accelerometer 3D gyroscope	YEI 3-Space sensors (Yost Engineering)	NS	300	1B	pelvis as close to the sacrum as possible (midway between the left and right posterior superior iliac spines)	NS	#	to investigate the effects of fatigue and load carriage on sacral kinematics during the countermovement jump
McGinnis RS, Perkins NC	A highly miniaturized, wireless inertial measurement unit for characterizing the dynamics of pitched baseballs and softballs	10.3390/s120911933	2012	Sensors	baseball, softball	pitching	to introduce a highly miniaturized IMU that is directly embedded within the small confines of a baseball/softball	a. baseball ex high school b. softball ex high schooll	a. 1 b. 1 (gender NS)	in field	#	ball’s velocity at release	3D accelerometer 3D gyroscope	custom-made	mass = 12g including battery and switch acc: range = 16g; resolution = 13-bit; noise magnitude = 0.004 g-rms gyro: range = 2000deg/s; resolution = 16-bit; noise magnitude = 0.38deg/s-rms for each axis (100 Hz output)	800 512	1E	within the ball	in a pocket machined in the cork and rubber core of the ball	#	IMUs allow to measure the release conditions of the ball, that is, the velocity of the ball center and the angular velocity of the ball, at release from the pitcher’s hand
McGrath D, Greene BR, O’Donovan KJ, Caulfield B	Gyroscope-based assessment of temporal gait parameters during treadmill walking and running	10.1007/s12283-012-0093-8	2012	Sports Engineering	running	walking and running (8 and 12 kph) on treadmill	to compare the performance of the adaptive gyroscope-based algorithm (AGA) to a marker-based motion capture system for the detection of HS and TO and associated temporal parameters during sustained walking and running	NS	4M, 1F	laboratory	heel strike, toe off, stance, stride, swing duration	#	3D gyroscope	Shimmer	NS	102.4	2B	shank (L,R)	NS	#	claim of usefulness in measuring stride variability
McGregor SJ, Busa MA, Skufca J, Yaggie JA, Bollt EM	Control entropy identifies differential changes in complexity of walking and running gait patterns with increasing speed in highly trained runners	10.1063/1.3147423	2009	Chaos	running	running	to use CE analysis of continuous HRA signal obtained over a range of speeds in highly trained runners during treadmill locomotion in an effort to gain insight into the control constraints that are present in this population	experienced	7 M	laboratory	#	linear analysis: acceleration root mean square and magnitude non linear analysis: control entropy (dynamical system theory) and Karhunen-Loeve (K-L) transform (from statistical theory of spatio-temporal systems)	3D accelerometer	G-link (Microstrain)	range = ± 10g	625	1B	intersection of the sagittal and axial planes on the posterior side of the body in line with the top of the iliac crest in order to approximate the center of mass	the accelerometer was mounted to a semi-rigid strap and additionally secured with elastic tape in order to any extraneous movement not associated with locomotion	spirometry (Jaeger Oxycon Mobile, Viasys, CA) + heart rate (Polar t-31, Polar Electro, Oulu, Finland)	distinct differences in complexity and patterns of complexity were observed between individual axes, as well as between individuals + K-L analysis can be applied to CE results to identify predominant patterns of complexity changes in these data
McGregor SJ, Busa MA, Yaggie JA, Bollt EM	High resolution MEMS accelerometers to estimate VO2 and compare running mechanics between highly trained inter-collegiate and untrained runners	10.1371/journal.pone.0007355	2009	PlosOne	running	running	to determine on highly trained collegiate runners and untrained individuals: a. the validity of HRA reported in g’s to VO2 and speed b. the test-retest reliability of HRA across a wide range of walking/running speeds c. differences in HRA between trained and untrained runners during treadmill locomotion	experienced recreational	7M 7M	laboratory	#	acceleration root mean square and magnitude and economy of acceleration and ratio between root mean square and magnitude	3D accelerometer	G-link (Microstrain)	range = ± 10g	625	1B	intersection of the sagittal and axial planes on the posterior side of the body in line with the top of the iliac crest in order to approximate the center of mass	the accelerometer was mounted to a semi-rigid strap and additionally secured with elastic tape in order to any extraneous movement not associated with locomotion	#	vague indications about the risk factor associated to high impact forces and about the relationship between accelerations and impact forces
McLellan CP, Lovell DI	Neuromuscolar responses to impact and collision during elite rugby league match paly	10.1519/JSC.0b013e318231a627	2012	Journal of Strength and Conditioning Research	rugby	8 regular season competition matches	to investigate the relationship between the prematch and short-term postmatch neuromuscolar responses to the intensity, number and distribution of impacts associated with collisions during elite Rugby league match play	elite league	22M	competition	#	impact (G Force) data (intensity, number, distribution) and total distance traveled characteristics	3D accelerometer	SPI-Pro (GPSports)	mass = 76 g; dimensions = 48 x 20 x 87mm^3	NS	1B	in the center area of the upper back slightly superior to the shoulder blades at the level of approximately the ﬁrst thoracic vertebrae	in a padded mini backpack contained in the vest	GPS 5 Hz	#
McLellan CP, Lovell DI, Gass GC	Performance analysis of elite rugby league match play using global positioning systems	10.1519/jsc.0b013e3181ddf678	2011	Journal of Strength and Conditioning Research	rugby	match	a. to examine physiological demands of competitive Rugby League match (monitor players’ movement patterns and heart rate) b. to examine positional comparisons to determine if players’ physiological requirements are influenced by their playing position.	elite	22M	competition	#	velocity zones (impossible to tell if GPS or acceleration are used)	3D accelerometer	SPI-Pro (GPSports)	mass = 76g; dimensions = 87 x 48 x 20mm^3; range = ±6g	NS	1B	in the center area of the upper back slightly superior to the shoulder blades at approximately T1 level.	worn in a padded mini backpack contained in the vest	GPS 5 Hz	studies on match characteristics (as many others)
McNamara DJ, Gabbett TJ, Chapman P, Naughton G, Farhart P	The validity of microsensors to automatically detect bowling events and counts in cricket fast bowlers	10.1123/ijspp.2014-0062	2015	International Journal of Sports Physiology and Performance	cricket	cricket training and competition	to validate the use of microtechnology devices in the automated detection of bowling events and counts in cricket fast bowlers during training and competition against current monitoring methods. A secondary aim of this study was to further refine the monitoring of bowling intensities, more specifically, run up velocity	elite	12M	competition	#	detection of bowling events based on back-foot contact and peaks in the rotation speed of the upper torso	3D accelerometer 3D gyroscope 3D magnetometer	MinimaxX S4 (Catapult)	NS	100	1B	upper back	in a small vest	GPS 10 Hz	the results of this study demonstrated that the MinimaxX unit was very sensitive for detecting bowling counts during both training and competition in elite fast bowlers
Meamarbashi A, Hossaini RA	Application of novel inertial technique to compare the kinematics and kinetics of the legs in the soccer instep kick	10.2478/v10078-010-0001-x	2010	Journal of Human Kinetics	soccer	in step kick	to analyse the kinematic and kinetic parameters of dominant and non-dominant legs	collegiate	15M	in field	leg swing time	shank angular velocity, linear velocity, angular acceleration and Z-axis linear acceleration, torque, angular power, angular momentum, and angular impulse	3D accelerometer	NS	mass = 80/70 g; dimensions = 230 × 23 × 25 mm^3 / 60 × 57 × 25 mm^3	130	2B	frontal mid-part of the thigh, middle-front aspect of the shank	using an elastic band	high-speed cameras	#
Mercer JA, Devita P, Derrick TR, Bates BT	Individual effects of stride length and frequency on shock attenuation during running	10.1249/01.MSS.0000048837.81430.E7	2003	Medicine and Science in Sports and Exercise	running	treadmill ( ±5, ±10,±15 % of preferred stride length and ±5, ±10,±15 100% of preferred stride frequency)	to identify the independent affects of stride length and stride frequency on shock attenuation	recreational (experienced in running on treadmill)	10M	laboratory	stride frequency	stride length, head and leg impact acceleration, shock attenuation (average transfer function across the 10 tp 20Hz frequency range with ratio of power spectral densities of head to leg)	1D accelerometer	custom-made 8628B50 (Kistler)	mass = 6.7g; range = ±50g; frequency response = 0.5-5kHz	1000	2B	distal antero-medial aspect of the leg and anterior aspect of the forehead	super-glued to a smalla piece of balsa wood and wrapped using a combination of athletic tape and adhesive compression bandage (leg), glued ot a leather headband which could be tightneded about a subject'shead, and adhesive compression bandage was then added	#	changes in stride length not stride frequency affected shock attenuation
Mercer JA, Vance J, Hreljac A, Hamill A	Relationship between shock attenuation and stride length during running at different velocities	10.1007/s00421-002-0646-9	2002	European Journal of Applied Physiology	running	treadmill ( 50, 60, 70, 80 , 90, 100% of maximal speed)	to investigate the characteristics of shock attenuation across a range of running speeds up to an individual's maximal running speed	recreational (experienced in running on treadmill)	8M	laboratory	stride frequency	stride length, leg and head peak impact acceleration, shock attenuation (ratio power spectral densities of head to leg)	1D accelerometer	custom-made 353 C67 (PCB Piezotronics)	mass = 2g; sensitivity = 100mV\g; frequency range = 0.3-12kHz	1000	2B	distal antero-medial aspect of the leg and anterior aspect of the forehead	mounted on a small piece of balsa wood and secured using an elastic Velcro strap (leg), secured to a rigid plastic headgear uwing a wax substance provided by the manufacturer (head)	#	shock attenuation increased linearly with running speed and running kinematic changes were characterized primarly by stride length changes
Michahelles F, Schiele B	Sensing and monitoring professional skiers	10.1109/MPRV.2005.66	2005	IEEE Pervasive Computing	alpine skiing	downhill skiing	to improve the trainer-athlete relationship by using wearable sensors to help them share their observations and impressions	NS	1	in field	#	acceleration and yaw during curves	3D accelerometer 3D gyroscope	custom-made ADXL210E (Analog Devices) custom-made ADXRS300 (Analog Devices)	range = ± 10g; range = ± 300deg/s	NS	3B, 1E	Accelerometers on skier’s thigh, lower legs, torso, and skis. Gyroscope on one ski.	Molded in shrinkable tubing to protect the electronics against water and snow. Velcro straps to affix the accelerometer unit. Waterproof housing protects the electronics from snow, and adhesive tape holds the gyroscope unit on the ski.	force-sensing resistors under the skier’s feet inside the boots; distance sensor at the ski boot’s side	the feedback system, based on wearable sensors and video recording, can reveal information about a skier’s motions, helping trainers identify the skier’s strengths and weaknesses
Mitchell E, Monaghan D, O’Connor NE	Classification of sporting activities using smartphone accelerometers	10.3390/s130405317	2013	Sensors	five-a-side soccer; field hockey	whole matches	to present a framework that allows for the automatic identification of sporting activities from a single smartphone worn on the upper body	recreational enthusiasts (soccer) elite (hockey)	15 17 (gender NS)	in field	#	stationary, walking, sprinting, jogging, dribbling, ball hit, tackle recognition and classification	3D accelerometer	Nexus One (Google), Desire (HTC)	resolution = 8-bit	16 (Google) 25 (HTC)	1B	upper crevice of the back	ad hoc vest with a pocket where the smartphone were located (see Figure 1)	no	#
Monnet T, Decatoire A, Lacouture P	Comparison of algorithms to determine jump height and ﬂight time from body mounted accelerometers	10.1007/s12283-014-0155-1	2014	Sports Engineering	jump	three squat jumps, three countermovement jumps with hands placed on the pelvis and three countermovement jumps with free arms	to analyse the Myotest and more generally body mounted accelerometer measurements and to propose improvement for greater accordance with force platform	physical education students	30 (gender NS)	in field	flight time	vertical jump height and vertical velocity at take-off	3D accelerometer	Myotest	NS	500	1B	NS	NS	#	the improvement proposed for the bodymounted accelerometer decreased the systematic bias, especially for the vertical jump height assessment, but not the random error
Montgomery GP, Pyne DB, Minahan CL	The physical and physiological demands of basketball training and competition	#	2010	International Journal of Sports Physiology and Performance	basketball	offensive and defensive practice drills, half court 5 on 5 scrimmage play, and competitive games	to characterize the physical and physiological responses during different basketball practice drills and games	elite junior	11M	competition	#	external training load, (ay1 – ay–1)2 + (ax1 – ax–1)2 + (az1 – az–1)^2	3D accelerometer	MinimaxX (Catapult)	NS	100	1B	at the lumbosacral region	in an elastic pouch fixed to the inside of Lycra under shorts	heart rate monitoring device (Suunto Pro Team Pack), GPS 5Hz	Accelerometer technology combined with predicted values of oxygen demand is a useful tool to determine the demands of basketball. This information can provide critical insight for the development and monitoring of training.
Moreira GP, Custódio IJDO, Greco PJ	Numerical superiority changes the physical demands of soccer players during small-sided games	10.5007/1980-0037.2015v17n3p269	2015	Rev Bras Cineantropom Desempenho Hum	soccer	small-sided soccer games	to compare the physical demands of soccer players during small-sided games in situations of numerical superiority and to compare the physical demands of additional and regular players	national youth competitors	18M	in field	#	acceleration level	3D accelerometer	SPI-Pro X2 (GPSports)	NS	100	1B	athlete’s chest	attached with specific straps	GPS 15 Hz	a reduction in physical demands was observed for small-sided games performed in unbalanced situations (4vs.3) and for additional players compared to regular players. This result permits coaches to adjust training configurations to their intentions during each session
Myers D	Relationship of anthropometric measurements and body composition to upper-body power in baseball players	#	2012	Missouri Journal of Health, Physical Education, Recreation & Dance	overload training	bench press throw	to explore the relationship between anthropometric measurements, body composition, and power output in male athletes using a BPT test	college	11M	laboratory	#	peak bar velocity and power	3D gyroscope 3D accelerometer	Myotest	NS	NS	1E	NS	NS	calibrated fiberglass masuring tape; Harpenden calipers	players with larger FFM (fat free mass) have the potential to produce more power in a linear upper-body movement + left in question is the degree to which such power has any effect on batting performance or throwing velocity
Myklebust H, Gløersen Ø, Hallén J	Validity of ski skating center-of-mass displacement measured by a single inertial measurement unit	10.1123/jab.2015-0081	2015	Journal of Applied Biomechanics	cross-country skiing	roller skiing on a treadmill	to simplify COM estimation in ski skating	elite	28M	laboratory	#	center of mass displacement	a. 3D accelerometer b. 3D accelerometer 3D gyroscope	a. PLUX, b. custom-made	a. mass = 11g; dimensions = 10 x 20 x 5mm^3; range = ±3g b. mass = 25g; dimensions = 55 x 38 x 10mm^3; range = ±2g, 250deg/s	a.1000, b.101,2	a.1B b. 1B	S1	medical tape	#	a. provided an accurate and precise estimate of vertical S1 displacement, but b. was required to attain accuracy and precision of < 8 mm (root-mean-squared error and range of displacement deviation) in all directions and with both subtechniques. Arm and torso movements affected COM, but not the S1. Hence, S1 displacement was valid for estimating sideways COM displacement, but the systematic ampli…
Myklebust H, Losnegard T, Hallén J	Differences in V1 and V2 ski skating techniques described by accelerometers	10.1111/sms.12106	2014	Scandinavian Journal of Medicine & Science in Sports	cross-country skiing	1-min trial of roller skating with two techniques on treadmill	to describe differences between techniques, V1 and V2, in terms of hip acceleration and to evaluate reproducibility	elite	14M	laboratory	plant and liftoff of each ski and pole ground contact, cycle time, cycle rate, push time	cycle length, acceleration, speed, position, displacement from mean position, accumulated distance of the "hip" (sacrum)	3D accelerometer	bioPLUX (pluX)	mass = 140g; dimension = 10x20x5mm^3; range = ±4.5g	1000	1B, 4E	sacrum, poles and sky boots	medical tape	#	V2 but not V1 showed similarities to double pling in the way that potiential energy is gained between poling strokes and transferred to propulsion during the poling action. One triaxial accelerometer on the lower back can distinguish techniques and might be useful in field research as well as in providing individual feedback on daily techniques training
Najafi B, Lee-Eng J, Wrobel JS, Goebel R	Estimation of center of mass trajectory using wearable sensors during golf swing	#	2015	Journal of Sports Science and Medicine	golf	a golf swing	to explore the accuracy of wearable sensors together with simplified biomechanical models for estimating CoM trajectory during significant body segment movements	a. healthy male b. healthy male c. golf players with established handicap	a. 3M b. 4M c. 12M, 6F	laboratory	#	lower back angle, centre of mass trajectory	3D accelerometer 3D gyroscope 3D magnetometer	LEGSysTM (BioSensics LLC)	NS	60	3B	shin, thigh, and lower back	Velcro bands	pressure platform (Emed® System)	this study proposed a simple system based on two wear-able sensor modules attached to subject’s shank and lower back and a simplified biomechanical human body model for estimating the center of mass trajectory with high agreement to the optical reference system (r>0.9). During golf swing trials, the average CoM range of motion was 12.96cm (A-P) and 19.35cm (M-L)
Nakano G, Iino Y, Imura A, Kojima T	Transfer of momentum from different arm segments to a light movable target during a straight punch thrown by expert boxers	10.1080/02640414.2013.843014	2014	Journal of Sports Sciences	boxing	straight punch	to determine the relationship between the reductions in momentum of punching arm segments and the impulse of the impact force when boxers throw a punch at a movable target	expert collegiate boxers	9M	laboratory	#	impact force parallel to the rods (acceleration* target mass)	1D accelerometer	custom-made AS-100HA (Kyowa)	NS	10000	1E	in the frame and the target	#	Vicon system to measure body segments momentum	peak and impulse of the impact force are correlated; reduction in momentum of the punching arm explained 95% of the impulse, therefore for boxers increasing the momentum of the punching arm rather than that of the other body segments immediately before the impact is effective at increasing the impulse of the punch
Nedergaard NJ, Kersting U, Lake M	Using accelerometry to quantify deceleration during a high-intensity soccer turning manoeuvre	10.1080/02640414.2014.965190	2014	Journal of Sports Sciences	soccer	turning manoeuvre	to examine the influence of turning intensity on the last three steps of a severe turn through accelerometry	soccer players	10M	laboratory	stance time	Joint angle and angular velocity; trunk acceleration	3D accelerometer	DTS 3D, (Noraxon)	range = ±16g	500	1B	posterior side of the upper torso between the scapulae	fixed in a small pocket of a tight elasticised vest	triaxial force platform (9281B, Kistler, Winterthur, Switzerland); 12 camera motion capture system (Oqus 400, Qualisys AB, Gothenburg, Sweden)	it is important to examine the steps prior to turning and the high frequency loading characteristics of those steps. This finding has important implications for examining turning performance and the influence of factors such as fatigue and recovery from injury
Nedergaard NJ, Robinson MA, Eusterwiemann E, Drust B, Lisboa PJ, Vanrenterghem J	The relationship between whole-body external loading and body-worn accelerometry during team sports movements	10.1123/ijspp.2015-0712	2015	International Journal of Sports Physiology and Performance	team sports	forward running, and anticipated 45° and 90° side-cuts	to investigate the relationship between whole-body accelerations and body-worn accelerometry during team sports movements	recreational	20M	laboratory	stance and swing times	peak resultant acceleration, average loading rate , impulse	3D accelerometer	a) KXP94, (Kionex), embedded in a GPS device, MinimaxX S4 (Catapult); b) 518, DTS accelerometer, (Noraxon)	a) range = ±13g; b) mass = 5.7g; dimensions = 19 x 14.2 x 6.3mm^3; range = 24g	a. 100 b. 1000	a. 1B b. 2B, 1E	a. dorsal part of the upper trunk between the scapulae; b. one fixated to the posterior side of the GPS device, one located at 5th lumbar vertebra, one at the tibia	a. within a small pocket of a tight fitted elastic vest; b. double sided tape and velcro straps;	force platform (9287C, Kistler Instruments Ltd., Winterthur, Switzerland), photocell timing gates (Brower Timing System, Utah, USA)	tibial segmental accelerations are not a good indicator of whole-body mechanical loading. Conversely, a tibia mounted accelerometer has the potential to monitor initial loading rate in team sport
Neville J, Rowlands DD, Lee JB, James DA	A model for comparing over-ground running speed and accelerometer derived step rate in elite level athletes	10.1109/JSEN.2015.2477497	2016	IEEE Sensors Journal	Australian football	running	to explore the use of accelerometer based devices as tools to estimate athlete running speeds	elite	44M	competition	step frequency	estimate of centre of mass velocity	3D accelerometer	GPSport (Wi SPI)	mass < 100g; range = ±8g	100	1B	over T5 of the thoracic vertebrae	in specially designed vests	GPS 5 Hz	a model can be build to relate an athlete’s step frequency to their speed
Norris M, Kenny IC, Anderson R	Comparison of accelerometry stride time calculation methods	10.1016/j.jbiomech.2016.05.029	2016	Journal of Biomechanics	running (distance running)	half marathon	to compare previously utilised methods of stride time derivation to an original proposed method, utilising medio-lateral tibial acceleration data filtered at 2 Hz, allowing for greater efficiency in stride time output	recreational	1M, 5F	in field	stride time	#	3D accelerometer	Shimmer 2r (Shimmer)	mass = 28g; range = ± 6g; sensitivity = 200mV/g	204.8	1B	antero-medial distal tibia	purpose built elastic strap	#	the proposed method is more robust to signal fluctuations and subject- and tecnique-specific changes; it can be automated without manual intervention + it may be useful for recreational runners, high level athletes and researchers
Nuzzo JL, Anning JH, Scharfenber JM	The reliability of three devices used for measuring vertical jump height	10.1519/JSC.0b013e3181fee650	2011	Journal of Strength and Conditioning Research	jump tests	countermovement jump	to assess the intersession and intrasession reliability of the Vertec, Just Jump System, and Myotest for measuring countermovement jump	recreational (university exercise science students)	40M, 39F	in field	#	jump height	3D accelerometer	Myotest	NS	200	1B	lower lumbar region	elastic stretch band	Vertec, microswitches mat (Just Jump System)	to attain reliable countermovement jump height measurements: famiiarize with the countermovement jump technique and then numerous repetitions until performance plateau (particularly for Vertec)
O Connor S, McCaffrey N, Whyte E, Moran K	The novel use of a SenseCam and accelerometer to validate training load and training information in a self-recall training diary	10.1080/02640414.2015.1050600	2016	Journal of Sports Sciences	gaelic football	training sessions	to examine the novel use of data fusion from a wearable camera device (SenseCam) and accelerometer to validate a self-recall training diary	university athletes	22M, 8F	in field	training and travel duration	training intensity	NS	Actigraph G3TX (Actigraph)	NS	NS	1B	right hip halfway between the anterior superior iliac spine and posterior superior iliac spine	NS	SenseCam (Vicon Revue, Microsoft, Cambridge, UK)	the novel combination of a wearable camera device and accelerometer to validate other assessment tools (training diaries) is supported to accurately track both training load and training information. Care should be taken about the number and types of sensors used (i.e. underwater sensors and located also at wrist or ankle level) which would ensure activities like cycling and resistance exercise a…
Ohgi Y, Ichikawa H, Homma M, Miyaji C	Stroke phase discrimination in breaststroke swimming using a tri-axial acceleration sensor device	doi.org/10.1007/BF02903532	2003	Sports Engineering	swimming	breast stroke	to observe swimmers’ wrist acceleration in the breaststroke using the tri-axial acceleration sensor device to apply the stroke phase discrimination method to the breaststroke	college athlete	1M, 1F	in field	stroke phase discrimination	#	2D accelerometer	custom-made	mass = 62g	NS	1B	Wrist	wristwatch	#	this methodology allows us to identify which stroke phase would be changed in skill training or over training, and the acceleration sensor device has the potential to become a precise stroke pedometer or stroke monitoring tool in the near future
Ohgi Y, Ichikawa, H, MiyajI C	Microcomputer-based acceleration sensor device for swimming stroke monitoring	10.1299/jsmec.45.960	2002	JSME International Journal Series C	swimming	front-crawl (300m x 3times)	to develop a microcomputer-based acceleration logger device for the swimming sroke measurementtriaxial wrist acceleration over an hour for the fatigue evaluation	experienced	4M, 1F	in field	stroke phases (entry and tretch, downsweep, in sweep, upsweep and recovery phase)	#	3D accelerometer	custom-made ADXL210 (Analog Devices)	mass = 50g (including battery); dimensions = 88 x 21mm^2; range = ±10g; digital trigger start	128	1B	distal left forearm	taping and bandage	LactatePro, two underwater cameras	the developed acceleration data logger fould provide the information about the underwater sroke phases and it would be a helpful tool in the swimming training
Omkar SN, Vanjare AM, Suhith H, Kumar GH	Motion analysis for short and long jump	#	2012	International Journal of Performance Analysis in Sport	jump tests	standing short jump and long jump	to use IMUs for detecting jump parameters, determining their accuracy using video based analysis and theoretical estimations	NS	17M	in field	#	take off velocity, take off angle impact force (acceleration)	3D accelerometer 3D magnetometer	NS	overall mass (sensors+wireless module) = 250g	60	8B	talus, above and below the knee joint, back (near CoM), neck	Velcro straps and tied to the body	vibration platform and a Microstrain 3DM-GX1 (for calibration purposes)	optimum take-off angle to cover a fixed distance, with minimum initial velocity, was found to be in the range 32º-36º for short jump and 35º-39º for long jump
Page R, Marrin K, Brogden C, Greig M	Biomechanical and physiological response to a contemporary soccer match-play simulation	10.1519/JSC.0000000000000949	2015	Journal of Strength and Conditioning Research	soccer	intermittent activity on a treadmill	to quantify and validate the biomechanical and physiological response to a novel soccer-specific protocol characterized by clusters of high-intensity efforts. To consider the previous criticism of treadmill protocols as being unidirectional, and thus not replicating the mechanical load associated with match play	semiprofessional	18M	laboratory	#	workload	3D accelerometer	KX94 (Kionix)	NS	100	1B	at the cervical region of the spine	sensor housed in a GPS unit, held by a neoprene vest	heart rate monitor (Polar Team System, Polar Electro Oy) blood lactate analyser ((Lactate Pro, LT-1710) breath-by-breath portable metabolic analyzer (Cosmed K4 b2)	the soccer-specific protocol provides a valid stimulation of the total distance covered, the velocity profile, and the physical response associated with soccer match play. the physiological response elicited is therefore a valid representation of soccer-match play. The protocol provides varied opportunites for the stregth and condition coach, primarily in representing a valid stimulus to develop …
Pansiot J, Zhang Z, Lo B, Yang GZ	WISDOM: wheelchair inertial sensors for displacement and orientation monitoring	10.1088/0957-0233/22/10/105801	2011	Measurement Science and Technology	wheelchair tests	straight line and figure-eight trials	to propose the use of a miniaturized wireless wheel-mounted inertial sensor for wheelchair motion monitoring and tracking in an indoor sport environment	able-bodied subjects with none or very little experience in propelling wheelchair	8M, 1F	laboratory	#	real-time velocity heading ground distance covered motion trajectory	3D gyroscope 3D accelerometer	custom-made ADXL330 (Analog Devices) custom-made ITG-3200 (Invensense)	mass = 10g; dimensions = 20 x 30 x 17mm^3	30-50	2E	one node on each rear-wheel axle	elastic strap or small clamp	#	#
Picerno P, Camomilla V, Capranica L	Countermovement jump performance assessment using a wearable 3D inertial measurement unit	10.1080/02640414.2010.523089	2011	Journal of Sports Sciences	jump tests	countermovement jump	to validate a wearable inertial measurement unit (IMU),containing a 3D accelerometer and gyroscope,for estimation of countermovement jump height	experienced	16M, 12F	laboratory	#	jump height and flight time	3D gyroscope 3D accelerometer	Sensorize	range = ±6g; range = ±500deg/s	100	1B	trunk (L5)	using elastic belt	#	the estimation of jump height leads to accurate results when the measured accelerations are corrected for trunk rotations
Picerno P, Iannetta D, Comotto S, Donati M, Pecoraro F, Zok M, Tollis G, Figura M, Varalda C, Di Muzio D, Patrizio F, Piacentini MF	1RM prediction: a novel methodology based on the force–velocity and load–velocity relationships	10.1007/s00421-016-3457-0	2016	European Journal of Applied Physiology	overload training	chest-press and leg-press exercises	to evaluate the accuracy of a novel approach for predicting the one-repetition maximum (1RM)	healthy, not resistance trained	27M, 10F	in field	#	average vertical force, lifting velocity and mechanical power	3D accelerometer 3D gyroscope	Sensorize	NS	NS	1E	with an arbitrary orientation on an arbitrary point of the mobile part of the weightstack	using a magnetic pocket	#	the proposed methodology for the estimate of 1RM, based on velocity measures performed using MIMUs, is suggested as a valid and safer alternative to the direct determination of 1RM and as a more accurate alternative to commonly used 1RM prediction methodologies
Polglaze T, Dawson B, Hiscock DJ, Peeling P	A comparative analysis of accelerometer and time - motion data in elite men's hockey training and competition	10.1123/ijspp.2014-0233	2015	International Journal of Sports Physiology and Performance	field hockey	international competitions and small-sided game training sessions	to determine if: a. a relationship exists between player load and distance covered b. this relationship varies between training sessions and competitions or between playing positions	Australian national team (International) elite	24M	competition	#	absolute and relative distance and player's load (not specified how)	3D accelerometer	Minimax S4 (Catapult)	NS	100	1B	between the player’s scapulae	custom-designed harness	GPS 10 Hz	Player load in hockey is mostly accumulated through running and other locomotor actions, such that player load is not effective in quantifying other activities (evasion, low stance) that contribute to physiological demands, particularly in training
Praz C, Fasel B, Vuistiner P, Aminian K, Kayser B	Optimal slopes and speeds in uphill ski mountaineering: a field study	10.1007/s00421-016-3455-2	2016	European Journal of Applied Physiology	uphill ski mountaineering	uphill	to describe the effects of speed and gradient during uphill ski mountaineering on energy expenditure, to relate any changes to changes in stride characteristics, and to determine an optimal gradient and speed allowing minimization of energy expenditure	well trained and experienced	11M	in field	stride length, stride frequency, relative and absolute thrust phase duration	slope gradient	3D accelerometer 3D gyroscope	Physilog 3 (Gait Up)	mass = 36gr; range = ±11g; range = ±1200 deg/s	500	2E	on the ski in front of the binding.	NS	heart rate monitor (Suunto Ambit)	during ski mountaineering uphill at shallow gradient, energy cost linear and vertical and mechanical efficiency do not vary with speed, while at steeper gradient economy is improved. It follows that to minimize energy expenditure and optimize performance to reach a place located at a higher altitude, an athlete should coose a steep gradient, if he/she is able to maintain a sufficient speed
Praz C, Fasel B, Vuistiner P, Aminian K, Kayser B	Optimal slopes and speeds in uphill ski mountaineering: a laboratory study	10.1007/s00421-016-3371-5	2016	European Journal of Applied Physiology	uphill ski mountaineering	uphill	to estimate the energy cost of linear and vertical displacement, mechanical efficienty and main stride parameters during simulated ski mounatineering at different speeds and gradients, to identify an optimal speed and gradient that maximizes performance	experienced	10M, 2F	laboratory	stride length, stride frequency, relative and absolute thrust phase duration	slope gradient	3D accelerometer 3D gyroscope	Physilog 3 (Gait Up)	mass = 36gr; range = ±11g; range = ±1200 deg/s	500	2E	on the ski in front of the binding.	NS	metabolic measurement system (CPX, Medgraphics), heart rate beat-by-beat with a portable HR monitor (Polar S610)	A combination of a decreased relative thrust phase duration with increased stride length and frequency decreases vertical energy cost. To minimize the energy expenditure to reach the top fo a mountin an dto optimize performance, ski-mountaineers should coose a steep gradient (24%) and, provided they possess sufficient metabolic scope, combine it with a fast speed (6kmh^-1)
Pruyn EC, Watsford ML, Murphy AJ	Differences in lower-body stiffness between levels of netball competition.	10.1519/JSC.0000000000000418	2015	Journal of Strength and Conditioning Research	netball	standing and lying	to examine for any differences in lower-body stiffness between athletes participating at various levels of netball competition, with the hypothesys that elite players would have higher lower-body stiffness than lower-ranked players	elite sub-elite representative recreational	9F 17F 11F 8F	laboratory	#	passive stiffness (lateral and medial gastrocnemius, soleus, achilles aponeurosis) during lying and standing	1D accelerometer	myometer, Myoton-Pro (Myoton)	NS	3200	1E	lateral and medial gastrocnemius, soleus, Achilles aponeurosis	positioned immediately above the skin	1D force platform (Onsport, Wollongong, Australia)	elite players possess higher levels of active stiffness when compared with their lower-ranked counterparts. The differences in stiffness levels may contribute to a player's ability to physically perform at an elite level and also provide one explanation into elevated rates of injury at higher levels of competition
Requena B, Garcia I, Requena F, Bressel E, Saez-Saez de Villarreal E, Cronin J	Association between traditional standing vertical jumps and a soccer-specific vertical jump	10.1080/17461391.2012.708790	2014	European Journal of Sport Science	jump tests	three tests trials for each jump (CMJ, DJh, DJh/t and soccer-specific vertical jump ssVJ ) were collected, and a rest period of 1 min was implemented between trials	a. to determine the relationships between an ssVJ test that included common elements of a soccer VJ (e.g. runup and intention to head), and three traditional VJ tests using elite soccer players b. to calculate the reliability of the VJs used, with special attention to the ssVJ protocol	elite soccer	25M	laboratory	contact times, flight times and velocity at take-off	#	3D accelerometer 3D gyroscope	KeimoveTM	range = ±8g; range = ±500deg/s	NS	1B	trunk (L5)	elastic belt		it can be considered that the ssVJ proposed, characterised by the aim of the player to head the ball during the flight phase of the jump, may not be a ‘real’ maximum VJ test. It would seem that run-up VJ tests and CMJ or DJh tests assess different leg qualities and thought should be given before using them interchangeably to assess or develop the same performance measures
Requena B, Requena F, García I, Saez-Saez de Villarreal E, Pääsuke M	Reliability and validity of a wireless microelectromechanicals based system (Keimove™) for measuring vertical jumping performance	#	2012	Journal of Sports Science and Medicine	jumping	countermovement jump	to determine the reliability of performance variables relative to a countermovement jump (CMJ) as measured by a MEMs based-system (Keimove™) against reference measures	professional	30M	laboratory	flight time	takeoff velocity	3D accelerometer 3D gyroscope 3D magnetometer	Keimove™	mass = 19g; dimensions = 45 x 40 x 13mm^3; range = ± 8g	1000	1B	at L4-L5 vertebral levels	via a designed elastic belt	#	the Keimove™ system represents a valid and reliable instrument to measure velocity at takeoff and flight time during vertical jump testing
Ritchie D, Hopkins WG, Buchheit M, Cordy J, Bartlett JD	Quantification of training and competition load across a season in an elite australian football club	10.1123/ijspp.2015-0294	2016	International Journal of Sports Physiology and Performance	Australian football	training modality and competition, during a full-season	to quantify training and competition load across a season in an elite AF team, using rating of perceived exertion (RPE) and GPS tracking	professional	44M	competition	#	PlayerLoad (3D jerk)	3D accelerometer	MinimaxX S4 (Catapult)	NS	100	1B	across the upper back between the left and right scapulae	inside a custom-made vest supplied by the manufacturer	GPS 10 Hz (MinimaxX S4, Catapult)	wearable devices allow to characterize training load in preseason and in-season periods, analysing load coming from games and training
Robinson MG, Holt LE, Pelham TW, Furneaux K	Accelerometry measurements of sprint kayaks: the coaches' new tool	#	2011	International Journal of Coaching Science	kayak (k1 and k4)	craft propulsion	to support coaches with objective methods for the evaluation of strokes, crewmembers selection and to determine if an in-board accelerometer can be used	world champion olympic team	1F 5F	in field	stroke duration, stroke number	boat acceleration along the longitudinal axis	1D accelerometer	custom-made ADXL 105 (Analog Devices)	range = ±5g	100	1E	midpoint of the shaft	NS	video recordins (30fps)	useful feedback to athletes/coaches to study: 1) imbalance (R vs L); 2) peak forces before the paddles leaving the water
Rontu JP, Hannula MI, Leskinen S, Linnamo V, Salmi JA	One-repetition maximum bench press performance estimated with a new accelerometer method	10.1519/JSC.0b013e3181c7c433	2010	Journal of Strength and Conditioning Research	overload training	bench press	to evaluate a new method to predict 1RM bench press performance from a submaximal lift	trained (3d/ w) floorball players	22M	in field	#	1 repitition maximum (estimated from max vertical acceleration)	3D accelerometer	custom-made (ST Microelecronics)	NS	1000	1B	right wrist	NS	#	the main benefit of the present method in addition to accuracy seems to be simpleness and flexibility. With the present method, it is possible to make the 1RM test even at the beginning of every training session if needed. A training program could be then easily modified according to the present day’s performance level
Rowlands AV, Stone MR, Eston RG	Influence of speed and step frequency during walking and running on motion sensor output	10.1249/mss.0b013e318031126c	2007	Medicine and Science in Sports and Exercise	running	each participant walked (constant ground contact) on a motor-driven treadmill for 60 s at 4, 5, and 6 km/h, ran (visible flight phase) for 60 s at 8, 10, 12, 14, 16, and 18 km/h, and ran for 30 s at 20, 22, 24, and 26 km/h	to determine the relationships of the triaxial RT3 accelerometer, the ActiGraph uniaxial accelerometer, and the Yamax pedometer with speed and step frequency (SF) across a wide range of walking and running speeds	trained short- and middle-distance runners (university athletics club)	10M	laboratory	step frequency	#	1D accelerometer 3D accelerometer	RT3 (ActiGraph) (Yamax)	RT3 range = 0.05-2g; ActiGraph range = ±2.13g	RT3: NS ActiGraph: 30	2B	right and left hip	integral belt clips or elastic belt according to the device	#	#
Rowlands D, James DA, Thiel D	Bowler analysis in cricket using centre of mass inertial monitoring	10.1002/jst.87	2009	Sports Technology	cricket	bowling submaximally action	to demonstrate that one can extract useful parameters from the CoM that quantify the action of a bowler	NS	1	in field	#	timing of the bowling action, run-up speed, number of steps; hip rotation; step rate and step length	3D accelerometer 3D gyroscope 3D magnetometer	custom-made	range: ± 10g; range = 250deg/s	200	2B	sacrum	NS	#	this paper has demonstrated that one can extract useful parameters from the CoM that quantify the action of a bowler
Rowlands DD, James DA, Lee JB	Visualization of wearable sensor data during swimming for performance analysis	10.1080/19346182.2013.867965	2013	Sports Technology	swimming	front crawl (two laps of a 25m pool)	to present a case-based approach in which inertial sensor time series data from en elite and sub-elite swimmer are visualized in different forms to determine whether any merit exist warranting further examination	elite sub-elite	1 1	in field	stroke cycle	body roll velocity, phase space portrait, peak energy and shape of the stroke	3D accelerometer 3D gyroscope	custom-made	dimensions = 52 x 33 x 11mm^3; range = ±8g; range = ±1500 deg/s	100	1B	S1 of sacra	placed on sking	#	there is merit in further examination of these techniquesa as a tool for feedback. It was found that all the methods presented unique views of stroke biomechanics in a non technical yet intuittive way for clearer communication
Ruben RM, Molinari MA, Bibbee CA, Childress MA, Harman MS, Reed KP, Haff GG	The acute effects of an ascending squat protocol on performance during horizontal plyometric jumps	10.1519/JSC.0b013e3181cc26e0	2010	Journal of Strength and Conditioning Research	jump tests	series of jumps over 5 hurdles	to determine whether an ascending back squat protocol potentiates the performance of a plyometric activity that requires multiple horizontal jumps	recreationally trained	20M	NS	#	peak power, peak velocity, peak force	3D accelerometer	Myotest	NS	500	1B	waist	elastic belt	#	a strength-power potentiating complex (SPPC) that includes an ascending back squat protocol and a repetitive ballistic activity demonstrates a potentiation affect
Sadi F, Klukas R	New jump trajectory determination method using low-cost MEMS sensor fusion and augmented observations for GPS/INS integration	10.1007/s10291-012-0267-7	2013	GPS Solutions	bike	jumps riding the bycicle	to propose a new GPS/INS integration algoritum to determine the trajectory of an athlete executing jumps (while skiiing, snowboarding, montain biking)	NS	1M	in field	#	height, horizontal distance and drop of the jump	3D accelerometer 3D gyroscope 3D magnetometer	Minimax (Catapult)	NS	100	17E	in a backpack (in future action sports googles)	#	GPS_1 5 Hz (novatel) GPS_2 10 Hz (Catapult)	proposed algorithm accuracy shoulde be sufficient for the recreatingal user, on the other hand for the training purposes of "serious" athlete the junps are large and an error of 2-14cm will be insignificant with respect to the true jump values
Sagawa K, Abo S, Tsukamoto T, Kondo I	Forearm trajectory measurement during pitching motion using an elbow-mounted sensor	10.1299/jamdsm.3.299	2009	Journal of Advanced Mechanical Design, Systems, and Manufacturing	baseball pitching	pitching	to propose and validate a measurement method of 3D forearm movement during pitching motion using an elbow-mounted sensor	experienced (7,15 and 13y baseball career)	3M	laboratory	#	elbow trajectory, forearm orientation	3D accelerometer 3D gyroscope	custom-made (Crossbow Technology, Analog Devices, Murata, Microstone)	mass = 150g; dimensions = 10 x 10 x 4.3cm^3; 4 sensors: range = ±4g, and ±100g; range = ±300 and ±4000 deg/s	1000	1B	parallel to the ulna and faces toward the subjects's wrist	expandable velcro tape	#	the proposed method can estimate the 3D trajectory of the forearm during pitching using acceleration and angular velocity with estimation error of about ±10%
Sakurai Y, Fujita Z, Ishige Y	Automated identification and evaluation of subtechniques in classical-style roller skiing	#	2014	Journal of Sports Science and Medicine	roller skiing	roller Skiing	a. to develop of an automated system for identifying classical-style ski subtechniques using angular rate sensors b. to determine of the relationships among skiing velocity, ski course conditions, and ski subtechniques using a global navigation satellite system (GNSS) and the developed automated identification system	a. cross country skier b. college level	1M 5M, 5F	in field	#	identification of technique	accelerometer gyroscope	custom-made LP-WS0901 (Logical Product Corp.)	range = ± 50 g; range = ± 1500 deg/s	100	2B, 2E	wrists and roller skis	NS	GNSS	the subtechnique distribution plot could be used to analyze the technical characteristics of each skier
Saponara S	Wearable biometric performance measurement system for combat sports	10.1109/TIM.2017.2677679	2017	IEEE Transactions on Instrumentation and Measurement	karate	punch and kick tests	to design a wearable system for measurements of athlete’s performance in combat sports	athletes and coaches 1-25 years of experience	70 (gender NS)	laboratory	#	acceleration, speed, displacement, kick and punch force	a) 3D accelerometer b) 3D accelerometer 3D gyroscope 3D magnetometer	A) ADXL377 (Sparkfun) B) custom mobility sensor	a: range = ±200g; b: NS	A: 500; B: 50	a: 3B b: 1B	a: wrist, arm, ankle b: pelvis	a: worn as a ring-lace; b: belt	strain gauge sensors used to sense the deformation under the kick or punch of a thin aluminum plate	the wearable system supports athlete's performance assessment, the experimental measurements on different athletes confirm the strong relationship between the device’s tests and the real skill level of athletes, evaluated also through a coach subjective assessment
Sarkka O, Nieminen T, Suuriniemi S, Kettunen L	Augmented inertial measurements for analysis of javelin throwing mechanics	10.1007/s12283-016-0194-x	2016	Sports Engineering	javelin throwing	javelin throwing	to demonstrate that consumer-grade inertial navigation systems, augmented with some position and attitude data obtained from a video sequence, yield detailed information of the mechanics of javelin throwing	elite	2 (gender NS)	in field	phases duration	javelin position and velocity and javelin translational and rotational kinetic energies, power, and angular acceleration (see Table 1 for the full list of parameters)	1D accelerometer 1D gyroscope	custom-made	dimensions = 170 x 20 mm^2; mass = 47g; 1 gyro: range = ±350 rad/s 3 gyros: range = ±350 rad/s 3 accs: range = ±160m/s^2 3 accs: range = ±1200m/s^2	1000	1E	embedded in the tip of a javelin, about 0.7 m from the centre of mass	embedded in the javelin	#	although the presented system is a pilot, leaving space for further improvements, it already reveals the potential of inertial navigation systems to sports
Sato K, Sands WA, Stone MH	The reliability of accelerometry to measure weightlifting performance	10.1080/14763141.2012.724703	2012	Sports Biomechanics	weightlifting	snatch lift at 80%, 85%, and 90% of each athlete’s 1RM	to assess the test–retest reliability of a portable accelerometer system in measuring the peak barbell acceleration of national-level weightlifters over three training sessions and to investigate the effects of different training intensities on peak barbell acceleration	olympic team/ trainees	7M, 5F	in field	#	peak barbell acceleration	3D accelerometer	custom-made PS-2119 (PASCO)	mass = 170.1g (accelerometer), 240.3g (unit and foam)	100	1E	on the right side of the bar, simmetric to a metal collar of the same mass	a foam unit was designed to secure the accelerometer to the end of the bar	#	relatively high ICCs (95% confidence interval of 0.81–0.93) indicated that each lifter’s peak barbell acceleration at three intensities was consistent on multiple training sessions. Barbell acceleration decreased as the mass of the bar increased from 80% to 85% and from 85% to 90% of 1RM
Sato K, Smith SL, Sands W	Validation of an accelerometer for measuring sport performance	10.1519/JSC.0b013e3181876a01	2009	Journal of Strength and Conditioning Research	overload training	high-pull	to validate measures obtained by a commercially available accelerometer in comparison with kinematic data derived from video	experienced participators experienced competitors	4M 3M	in field	#	vertical acceleration	3D accelerometer	custom-made PS-2119 (PASCO)	mass = 56.7g (accelerometer) , 113.4g (wireless device); dimensions = 40 x 202 x 30 mm^3	100	1E	barbell	#	#	this device can be a valuable tool to provide instant feedback to coaches and athletes to assess individual barbell acceleration performance
Sbriccoli P, Camomilla V, Di Mario A, Quinzi F, Figura F, Felici F	Neuromuscular control adaptations in elite athletes: the case of top level karateka	10.1007/s00421-009-1338-5	2010	European Journal of Applied Physiology	karate	front kick	to investigate the neuromuscular response of knee flexor and extensor muscles in elite karateka and karate amateurs during isokinetic knee flexion/extensions and during the execution of a front kick (FK)	elite recreational	6M 6M	laboratory	#	hip and knee angular displacement and velocity	3D accelerometer 3D magnetometer	MTx (Xsens)	range = ±1.7g; range = ±1200 deg/s	NS	3B	sacrum (on S1 vertebra), on the latero-distal thigh (10 cm above the lateral epicondyle), and on the medial facet of the tibia (5 cm above the medial malleolus)	The sensors were firmly strapped in areas, arbitrary relative to the underlying bony segment, that minimize the effects of the relative movement between soft tissue and the bone.	#	the use of IMUs allowed to study neuromuscular control of the athletes while performing a real task
Scanlan AT, Wen N, Tucker PS, Dalbo VJ	The relationships between internal and external training load models during basketball training	10.1519/JSC.0000000000000458	2014	Journal of Strength and Conditioning Research	basketball	general and specific preparatory phases of the annual training plan (see table 1)	to describe and compare the internal (sRPE model, TRIMP, and SHRZ models) and external training loads (accelerometer model) encountered during basketball training	semi-professional	8M	in field	#	external training load = v[ (ay1 – ay–1)2 + (ax1 – ax–1)2 + (az1 – az–1)^2]/100	3D accelerometer	custom-made MMA7361L (Freescale Semiconductor)	range = ±6g	100	4B	posterior surface of the torso at the level of the inferior angle of the scapulae	affixed to a breakout board with a Logomatic data logger, secured to each player through customized pouches attached to the HR monitor chest bands	heart rate sensor	basketball coaching and conditioning professionals are recommended to (a) not implement training load models based solely on the known practices and existing research findings for field-based team sports; (b) understand the unique information that each training load approach provides before implementation; (c) not assume a linear dose-response between the external training load (detected by accel…
Schaffert N, Mattes K	Designing an acoustic feedback system for on-water rowing training	10.1109/mmul.2015.9	2011	International Journal of Computer Science in Sport	rowing	rowing strokes	to propose a prototype Sofirow (Sonification in rowing) as an online AF-system for on-water rowing training; to describe the technical requirements concerning the acoustic transformation (sonification) of the propulsive boat acceleration-time-trace (aboat trace)	junior national	23M	in field	rowing cycle	propulsive boat acceleration (3Dacceleration) and velocity (GPS)	3D accelerometer	custom-made SMB380 (Bosch Sensortec)	range = ±2g	up to 125	1E	positioned on top of the boat	NS	GPS	the on-water rowing training system demonstrated the possibility for the acoustic feedback to affect mean boat vel and accel trace intra-cyclically
Schütte KH, Maas EA, Exadaktylos V, Berckmans D, Venter RE, Vanwanseele B	Wireless tri-axial trunk accelerometry detects deviations in dynamic center of mass motion due to running-induced fatigue	10.1371/journal.pone.0141957	2015	PlosOne	running	indoor treadmill running	to detect deviations in the dynamic center of mass (CoM) motion due to running-induced fatigue	novice - competitive	12M, 8F	laboratory	#	acceleration root mean square, root mean square ratio of each axis to the resultant vector [McGregor et al, 2009], step regularity and stride regularity [Moe-Nilssen et al, 2004] and sample entropy of acceleration [Richman et al, 2000]	3D accelerometer	X16-2 (Gulf Coast Data Concepts)	mass = 48g; range = ±16g; resolution = 15-bit	400	1B	L3-L5 spinous process	double-sided tape	ten camera Vicon system (Vicon, Oxford Metrics, UK)	trunk-mounted accelerometers have a large potential to monitor the biomechanical-aspects of running, with the aim of detecting early onset of excessive variability or irregularities of horizontal plane accelerations due to fatigue
Scott BR, Lokie RG, Knight TJ, Clark AC, Janse de Jonge XAK	A comparison of methods to quantify the in-season training load of professional soccer players	10.1123/ijspp.8.2.195	2013	International Journal of Sports Physiology and Performance	soccer	97 individual training sessions	to compare various measures of training load (TL) derived from physiological (heart rate [HR]), perceptual (rating of perceived exertion [RPE]), and physical (global positioning system [GPS] and accelerometer) data during in-season field-based training for professional soccer	professional	15M	in field	#	external training load, (ay1 – ay–1)2 + (ax1 – ax–1)2 + (az1 – az–1)^2	3D accelerometer	Minimax X 2.0 (Catapult)	NS	NS	1B	between the scapulae	in a small pocket of an undergarment	heart rate monitors (Polar Team Pro, Polar Electro Oy), GPS (Minimax X 2.0, Catapult)	despite a recent increase in the use of GPS and accelerometer technology for field-sport monitoring, 14 the ability of these physical data to quantify external TL in professional soccer remains unclear
Seifert L, Dovgalecs V, Boulanger J, Orth D, Hérault R, Davids K	Full-body movement pattern recognition in climbing	10.1080/19346182.2014.968250	2015	Sports Technology	climbing	two easy routes (10-m in height under top-rote conditions)	to propose a method for full-body movement pattern recognition in climbing, by computing the 3D unitary vector of the four limbs and pelvis during performance	intermediate	1 (gender NS)	in field	#	coordination (cluster representing direction of four limbs and pelvis)	3D accelerometer 3D gyroscope 3D magnetometer	MotionPod (Movea)	range = ±8g; 1600deg/s	100	5B	pelvis, feet, forearms	NS	viedo	clustering supported identification of full-body orientations during trasversal, representing a level of analysis that can provide usegul information for performance monitoring climbing
Seifert L, Orth D, Boulanger J, Dovgalecs V, Hérault R, Davids K	Climbing skill and complexity of climbing wall design: assessment of jerk as a novel indicator of performance fluency	10.1123/JAB.2014_0052	2014	Journal of Applied Biomechanics	climbing	four repetition of two 10-m high routes with similar diccifulty levels but varying in hold graspability	to investigate a new performance indicator to assess climbing fluency (smoothness of the hip trajectoryand orientation of a climber using normalized jerk coefficients) to explore effects of practice and hold design on performance	intermediate/ experienced	8 (gender NS)	in field	#	jerk of hip trajectory and orientation	3D accelerometer 3D gyroscope 3D magnetometer	MotionPod (Movea)	range = ±8 g; 1600deg/s	100	1B	hip	NS	#	the computation of jerk values for hip trajectory and orientation provided two complementary indicators of climbing fluency that present a valuable contribution to understanding the effects of practice and route design on climbing performance
Seifert L, Wattebled L, Orth D, L'Hermette M, Boulanger J, Davids	Skill transfer speciﬁcity shapes perception and action under varying environmental constraints	10.1016/j.humov.2016.05.004	2016	Human Movement Science	climbing	10-m high route (indoor climbing wall); 10-m high route on an ice fall in a top-rope condition	to examine constraints on specificity of transfer of perception and action in indoor climbing relative to climbing on an icefall	recreational	12 (gender NS)	in field	#	jerk of hip trajectory	3D accelerometer 3D gyroscope 3D magnetometer	MotionPod (Movea)	range = ±8g; 1600deg/s	100	1B	hip	NS	video	results showed higher jerk coefficient values and number of exploratory movements for performance on the icefall route. Findings demonstrated how individuals solve different motor problems, exploiting positive general transfer processes enabling participants to explore the pick-up of information for the perception of affordances specific to icefall climbing
Setuain I, Martinikoren J, Gonzalez-Izal M, Martinez-Ramirez A, Gómez M, Alfaro-Adriánb J, Izquierdo M	Vertical jumping biomechanical evaluation through the use of an inertial sensor-based technology	10.1080/02640414.2015.1075057	2016	Journal of Sports Sciences	jump tests	bilateral (50 cm) and unilateral (20 cm) drop jumps, unilateral countermovement jump	to determine the reliability and validity of a lumbar spine IMU to assess jumping biomechanics for three different vertical jumps	physically active	9M, 8F	in field	#	peak acceleration and deceleration at take off and landing	3D accelerometer 3D gyroscope 3D magnetometer	MTx (Xsens)	NS	100	1B	L4-L5	NS	#	#
Shepherd JB, Wada T, Rowlands D, James DA	A novel AHRS inertial sensor-sased algorithm for wheelchair propulsion performance analysis	10.3390/a9030055	2016	Sensors	wheelchair tests	straight line 14 m test centre court to baseline linear test half court laps	to develop a new algorithm based on the computationally efficient open-sourced Madgwick’s AHRS algorithm aimed at estimating fundamental contextual propulsion characteristics, including distance, velocity, and trajectory in a camber agnostic and sensor-minimal system	NS	NS	in field	#	distance, trajectory, velocity	3D accelerometer 3D gyroscope 3D magnetometer	SABELSense	range = ±16g; range = ± 2000 deg/s; range = ±700mT	NS	5E	2 MIMUs on each wheel; 1 MIMU on th wheelchair frame (check Figure 2 in the paper)	NS	#	the proposed computationally-efficient camber agnostic algorithm has been proven to be an accurate measure of extracting key contextual propulsion elements. These elements, when fed back to coaching staff, could aid in informing tactical decisions, enhancing player performance, and mitigating injury
Sinclair J, Toth J, Hobbs S	The influence of energy return and minimalist footwear on the kinetics and kinematics of depth jumping in relation to conventional trainers	#	2015	Kinesiology	jumping	depth jumps	to examine the influence of minimalist, energy return and conventional footwear on the kinetics, 3-D kinematics and temporal aspects of depth jump performance	university athletes	10M	NS	#	tibial accelerations	1D accelerometer	ACL 300 (Biometrics)	NS	1000	1B	distal tibia	onto a piece of carbon-fibre material using the procedure of Sinclair et al. (2013)	piezoelectric force platform (Kistler), motion analysis system (Qualisys Medical AB)	those who wish to maximize performance during depth jumping should select energy return footwear. However, those utilizing depth jumping as part of their training who are susceptible to chronic injury may wish to consider minimalist footwear
Siska L, Brodani J, Stefanovsky M, Todorov S	Basic reliability parameters of a boxing punch	10.7752/jpes.2016.01038	2016	Journal of Physical Education and Sport	boxing	direct hand punch	to verify the reliability of the diagnostic devise "BOXE- CHECK" for measuring the force and the time duration of a boxing punch	av. 2.5 years experience	4M, 8F	in field	#	acceleration of the boxing bag at the time of the punch, force and time duration of the punch	accelerometer (number of components NS)	agility plate and accelerometer (FiTRO)	NS	NS	1E	the plate and the accelerometer are on the boxing bag, on two opposite sides	plate fixed to the boxing bag using contrasting silver-coloured tape from each side which formed a clearly visible squre creating a targets for probands to hit.		device "BOXE-CHECK" may be used in the actual training process where we can with he help of this device perform the whole training session. This aumount of punches gives us more accurate information of the efficiency of each punch.
Slawson SE, Justham LM, Conway PP, Le-Sage T, West AA	Characterizing the swimming tumble turn using acceleration data.	10.1177/1754337111428395	2012	Proceedings of the Institution of Mechanical Engineers, Part P: Journal of Sports Engineering and Technology	swimming	front crawl	to develop of a swimmer-worn, wireless sensor node capable of capturing real time acceleration data during all phases of swimming	elite	1M	in field	speciﬁc phases of the tumble turn	#	3D accelerometer 2D gyroscope	custom-made	dimensions = 90 x 40mm^2	NS	1B	Lower back	NS	#	these presentation methos supply results in an eary-to interpret manner, whereby outliers and variations in performance could be visually identified
Sleivert G, Taingahue M	The relationship between maximal jump-squat power and sprint acceleration in athletes	10.1007/s00421-003-0941-0	2004	European Journal of Applied Physiology	jump tests	two strenght/power testing sessions (1 repetition maximum parallel and split squat strenght, power at different percentages of maximal load)	to investigate the relationship bewteen sprint start performance (5m time) and strenght and power variables	power type sport athletes - at least 1 year of weight training	30M	in field	#	peak force, peak reate of force development, velocity, power (bar)	1D accelerometer	custom-made ADXL150EM1 (Analog Devices)	sensitivity = 200mV/g; bandwith = 0-100Hz	NS	1E	bar	#	video, velocimeter, force plate (for sprint session)	concentrinc force develpment is critical to sprint start performance and accordingly maximal concentric jump power is related to sprint acceleration
Smith RM, Loschner C	Biomechanics feedback for rowing	10.1080/026404102320675639	2002	Journal of Sports Sciences	rowing	rowing	to provide examples of how useful biomechanical feedback can be obtained from a system that measures all the forces that have a signicant eþ ect on boat speed	elite sub-elite	2M 2M	in field	#	boat propulsive force, vertical and horizontal oar angles, boat speed, including intra-stroke fluctuations, acceleration and orientation of the boat along and around the three axes of the boat, seat position	3D accelerometer 3D gyroscope	custom-made: accelerometer (Analog Devices) gyroscope (Murata)	NS	100	1B	boat	NS	piezoelectric transducers (Kistler, Switzerland) + two shear-beam load cells (Applied Measurement, Australia) + low-friction potentiometers and a breglass arm + magnetic turbine, pick-up coil and frequency-to-voltage converter were used to track boat speed + cable and drum potentiometer (Aerospace Technologies)	the integrated system, known as Rowsys2, provided concurrent visual feedback to the rower. The coach was able to make suggestions about the required change in pattern of force development or boat behaviour, and both rower and coach could observe whether the change had been made. The rower was able to associate the objective information with his or her own proprioception. Furthermore, the data wer…
Spratford W, Portus M, Wixted A, Leadbetter R, James DA	Peak outward acceleration and ball release in cricket	10.1080/02640414.2014.962577	2015	Journal of Sports Sciences	cricket	ball throwing	to investigate the utility of peak outward acceleration (POA) from an inertial sensor worn at the wrist as an indicator of the critical end point of the bowling action – ball release	junior elite	21M	laboratory	#	peak wrist outward acceleration	3D accelerometer	ADXL190 and ADXL321 (Analog Devices) IDG-650 (Invensense)	range 1D acc = ±100 g; 2D acc = ±18 g range = ±2000 deg/s	200	1B	proximal to the wrist	attached to a marker cluster fixed with double sided tape	#	IMU based measure of ball realease in cricket proved to be highly correlated and reliable when comparing to stereophotogrammetric reference. While the two measures were almost identical, any mistake in defining ball release has the potential to alter elbow extension measures and as such should always be treated with caution when elbow extension values are quantified
Squadrone R, Rodano R, Preatoni E	Comparison of velocity and power output data derived from an inertial based system and an optical encoder during squat lifts in a weight room setting.	#	2012	The Journal of Sports Medicine and Physical Fitness	overload training	back squat	to validate a new method to estimate velocity and power of squat lifting	semi-professional (tennis, soccer)	15M	laboratory	#	peak and mean velocity and power	3D accelerometer 3D gyroscope	FreePower (Sensorize)	range = ± 6g; range = ±500deg/s	200	1E	fixed to the barbel	designed magnetic socket	#	FreePower provides reasonable power and velocity parameters, usefull to monitor training
Stamm A, James DA, Thiel DV	Velocity profiling using inertial sensors for freestyle swimming	10.1007/s12283-012-0107-6	2013	Sports Engineering	swimming	front crawl at different effort	to develop a method for velocity proﬁling in freestyle swimming utilising a purpose-built inertial sensor	elite junior elite (retired)	8M 6M, 3F	in field	#	mean velocity, intra-stroke velocity variations, raw acceleration data	3D accelerometer 3D gyroscope	custom-made	mass = 20g; dimensions = 53 × 33 × 10mm^3	100	1B	Lower back	taped	#	the results show that an inertial sensor alone can be used to determine a lap velocity proﬁle from single point acceleration records
Staniak Z, Busko K, Górski M, Pastuszak A	Accelerometer profile of motion of the pelvic girdle in breaststroke swimming	10.1515/hukin-2016-002	2016	Journal of Human Kinetcs	swimming	breaststroke	to develop a method for measurement and analysis of kinematics of the pelvic girdle movement in breaststroke swimming to support training of technical skills	elite	5M	in field	cycle duration	kinematics profile of pelvis girdle (acceleration and angular velocity)	3D accelerometer 3D gyroscope	PARTwear (HuCE-microLab)	mass = 150g; dimensions = 65 x 50 x 30mm^3; range = ±6g; range = ±500deg/s	400	1B	sacrum	special belt made in half of an elastic band and in half of inextensible rope	#	good tool for fasta nd effective biomechanical evaluation of motion technique components
Starrs P, Chohan A, Fewtrell D, Richards J, Selfe J	Biomechanical differences between experienced and inexperienced wheelchair users during sport	10.1177/0309364612448807	2012	Prosthetics and Orthotics International	wheelchair tests	1. agility repeat turn test (agility) 2. sprint test (muscular power) 3. one-minute distance test (muscular endurance)	to examine the biomechanical differences between disabled (WCU) and able-bodied (NWCU) children whilst taking part in functional activities at the Cheetahs Wheelchair Sports Club	disabled wheelchair users able-bodied non weelchair users children (mean age: 9.2 y)	7 + 4 (4 + 4 used in the final analysis) (gender NS)	in field	#	trajectory of the upper-limb anatomical landmark and shoulder and elbow range of motion	3D accelerometer 3D gyroscope 3D magnetometer	Moven Biomech (Xsens)	NS	NS	16B	for the upper limbs: hands, wrists, forearms, arms, sternum and others	Moven suit (elastic belts)	#	larger shoulder range of motion for propulsion are realted to better performances in functional tests
Stetter BJ	A novel approach to determine strides, ice contact, and swing phases during ice hockey skating using a single accelerometer	10.1123/jab.2014-0245	2016	Journal of Applied Biomechanics	ice hockey	skating	to determine the agreement between IMU-based approach and a conventional approach for identifying strides, contact phase and swing phase	ice hockey players	6 (gender NS)	in field	contact , swing and stride times	#	3D accelerometer	custom-made (Analog Devices)	range = ±35g	2400	1E	center of the chassis	adhesive tape	#	the proposed novel algorithms to calculate timing events during ice hockey skating are useful in terms of ease of use and on-ice equipment limitations. From the perspective of a player and/or coach, this tool allows for measurements of important timing characteristics during skating on ice, thus lending itself as a future digital coaching tool
Stickford ASL, Chapman RF, Johnston JD, Stager JM	Lower-leg compression, running mechanics, and economy in trained distance runners	10.1123/ijspp.2014-0003	2015	International Journal of Sports Physiology and Performance	running	2 separate running economy (RE) tests during a single laboratory session, including a randomized-treatment trial of graduated calf-compression sleeves (CS; 15–20 mm Hg) and a control trial (CON) without compression sleeves. RE was determined by measuring oxygen consumption at 3 constant submaximal speeds of 233, 268, and 300 m/min on a treadmill	to examine whether wearing graduated lower-leg compression sleeves during exercise evokes changes in running economy (RE), perhaps due to altered gait mechanics	highly trained	16M	in field	ground-contact time, step frequency, swing time	step length	3D accelerometer	G-link (Microstrain)	range = 10g	1024	2E	to the shoelaces on each foot	plastic ties	gas analysis	the average percentage change in submaximal VO2 with compression treatment ranged from -4.8% to + 5.1%. A 5% improvement in RE Has Been shown to induce ~ 3.8% improvement in distancerunning performance, and a 10% improvement in results in RE ~ 7% improvement in 3000-m performance. Wearing lower-leg compression sleeves does not alter running mechanics or economy in highly trained distance runners …
Strohrmann C, Harms H, Kappeler-Setz C, Troster G	Monitoring kinematic changes with fatigue in running using body-worn sensors	10.1109/TITB.2012.2201950	2012	IEEE Transactions on Information Technology in Biomedicine	running (distance running)	45-min runs treadmill and outdoor track	to demonstrate the potential of wearable technology for monitoring running kinematics in the field with a study including two exhausting runs	beginner intermediate advanced expert	6 6 6 3 (gender NS)	in field	step frequency, normalized foot contact	vertical oscillation, arm movement, impact acceleration on upper body, trunk forward leaning, heel lift, shoulder rotation, maximum knee rotation velocity, foot strike type	3D accelerometer 3D gyroscope 3D magnetometer	ETHOS	mass = 22-27g; range = ±6g; range = 2000deg/s	100	12B	Wrists, elbows, knees, ankles, feet , scapula and back	velcro band (from figure)	GPS	wearable technology opens a door in the directoon of personalized monitoring on a regular basis, providing athletes and trainers with valuable quantitative measures of running technique
Suarez-Arrones L, Arenas C, López G, Requena B, Terrill O, Mendez-Villanueva A	Match-play activity profile in elite women’s rugby union players	10.1519/JSC.0b013e3182999e2b	2014	Journal of Strength and Conditioning Research	rugby	rugby competiton	a. to provide,for first time,an objective description of the locomotive activities and exercise intensity undergone during the course of an international-level match of female rugby union using GPS tracking technology b. secondary aim was to compare for the physical demands of elite female rugby union players according to the different playing positions	elite league	8F	competition	#	6 speed zones: standing or walking (0-6.0 km·h-1), jogging (6.1-12 km·h-1), running at low intensity (12.1-14.0 km.h-1), at medium intensity (14.1-18.0 km.h-1), at high intensity (18.1-20.0 km.h-1) and at sprint (>20.1 km·h-1).	3D accelerometer	SPI-Pro X (GPSports)	mass = 76g; dimensions = 48 x 20 x 87mm^3	100	1B	between the scapulae	in a neoprene harness	Heart rate	the results of the present study showed that during an international test match of women’s rugby union, players travelled ~ 5820 m at an average speed of 4.0 km·h-1 with greater overall distance covered by backs than forwards (6356 vs. 5498 m, P = 0.010). When expressed in distance per minute of match time this corresponds to approximately ~ 68.5 meters per minute
Suarez-Arrones L, Arenas C, López G, Requena B, Terrill O, Mendez-Villanueva A	Positional differences in match running performance and physical collisions in men rugby sevens	10.1123/ijspp.2013-0069	2014	International Journal of Sports Physiology and Performance	rugby seven	23 competitive matches	to describe the physical match demands relative to positional group in male rugby sevens	highly trained players	10M	competition	#	heart rate, time, speed, distance, accelerations and impacts	3D accelerometer	SPI-Pro X (GPSports)	NS	100	1B	on the upper back (ie, between the shoulder blades)	with an adjustable neoprene harness	heart rate monitor, GPS 15 Hz	Different physical demands are observed on rugby sevens backs and forwards. This information may be helpful in the development of positional and/or individualized physical-fitness training programs to improve performance
Sullivan C, Bilsborough J, Cianciosi M, Hocking J, Cordy J, Coutts A	Match score affects activity profile and skill performance in professional Australian football players	10.1016/j.jsams.2013.05.001	2014	Journal of Science and Medicine in Sport	Australian football	15 Australian Football League games	to examine the influence of quarter outcome and the margin of the score differential onboth the physical activity profile and skill performance of players during professional Australian Football matches	professional	40M	competition	#	physical activity profile (peak speed, number sprints, workload)	3D accelerometer	Team Sport 2.5 Firmware 6.54 (Catapult)	NS	NS	1B	NS	fitted within a custom made pouch in the playing jumper of each player	GPS 10 Hz	players are likely to have an increased physical activity profile and decreased skill involvement and proficiency when their team isless successful. Therefore, coaches and selectors should take care when using physical activity data to infer on players match performance
Sullivan C, Bilsborough JC, Cianciosi M, Hocking J, Cordy JT, Coutts AJ	Factors affecting match performance in professional Australian football	10.1123/ijspp.2013-0183	2014	International Journal of Sports Physiology and Performance	Australian football	15 Australian Football League games	to determine the physical activity measures and skill-performance characteristics that contribute to coaches’ perception of performance and player performance rank in professional Australian Football (AF)	professional	40M	competition	#	physical activity profile (peak speed, number of sprints, workload)	3D accelerometer	Team Sport 2.5 Firmware 6.54 (Catapult)	NS	100	1B	NS	fitted within a custom made pouch in the playing uniform of each player	GPS 10 Hz	coaches should use the combination of activity profile and objective measures such as player rank with their perceptions of players’ performance to properly interpret match performance in AF
Supej M	3D measurements of alpine skiing with an inertial sensor motion capture suit and GNSS RTK system	10.1080/02640411003716934	2010	Journal of Sports Sciences	skiing (alpine skiing)	skiing a typical race course (set with 20 turning gates)	a. to validate the system's precision b. to measure an entire alpine ski race and retrieve the results shortly after measuring	experienced	2M	in field	#	skis and centre of mass velocity	3D accelerometer 3D gyroscope 3D magnetometer	Moven (Xsens)	dimensions = 38 x 53 x 21 mm^3; 3D orientation accuracy<0.5deg; resolution = 0.05deg; accelerometer resolution = 2mg; gyroscope resolution = 0.6deg/s	60	16B	full body set up	Moven suit (elastic belts)	RTK global navigation satellite system (GNSS)	the results were ready to analyse shortly after the measurements,making it ideal for elite athlete technique or tactical analysis
Takano K, Li KF	A multimedia tennis instruction system: tracking and classifying swing motions	10.1504/IJSSC.2013.056406	2013	International Journal of Space-Based and Situated Computing	tennis	backhand, forehand, and overhand swings (three times each)	to develop a tennis instructional system that, based on motion-sensed input data, classifies a tennis stroke and compares it with a reference instructional database.	from novice to expert	50 (gender NS)	laboratory	#	swing classification and consistency measure	3D accelerometer 3D gyroscope	MotionPlus attached Wiimote	NS	NS	1B	kept in the hand	hand grip	#	#
Tan H, Wilson AM, Lowe J	Measurement of stride parameters using a wearable GPS and inertial measurement unit	10.1016/j.jbiomech.2008.02.021	2008	Journal of Biomechanics	running and bike	running on a country road, bicycling on a 400m outdoor track	to propose a data fusion scheme and a low cost GPS/IMU unit for determining average speed and intrastride variation	a. cyclist b. runner	1 1 (gender NS)	in field	stride frequency	horizontal speed and vertical displacement	3D accelerometer	a. MTx (Xsens) b. Freescale	a. range = ±10g; range = ±900deg/s; b. range = ±6g	250 (Xsens) and NS (freescale), evaluating 20 as optimal sampling frequency	1B, 4E	on a cycling helmet (runner) on the bike (bicycling)	mounted on a small wooden platform for the bike	GPS_1 (OEM4, NovAtel, Canada, 20 Hz) GPS_2 (Trine, EMTAC, USA, 1 Hz) GPS_3 (Garmin Forerunner, 1 Hz) GPS_4 (LEA-4T, U-blox, Switzerland, 10 Hz)	proposed algorithm gives measurements that are efficient for the estmiation of stride frequency and mechanical energy fluctuations using low cost single frequency CPS unit together with 3D acc
Tang WT, Zhang WY, Huang CC, Young MS, Hwang IS	Postural tremor and control of the upper limb in air pistol shooters	10.1080/02640410802287063	2008	Journal of Sports Sciences	air pistol shooting	10 shots (outstretched right arm)	to compare the coordinative control of the shooters and to identify the features critical to successful shooting	elite sub-elite	10M 10M	competition	#	postural tremor root mean square, spectral peaks of the acceleration data (4-7 and 8-12 Hz), ratio between lateral and vertical acceleration root mean square	3D accelerometer	custom-made (Analog Devices)	mass<1 g; dimensions = 5 x 5 x 2 mm^3; range = ±2 g	400	1B	pistol, index finger, hand, forearm, arm	#	#	the use of a tremor feedback system to restructure the directional control of the hand of pre-elite air pistol shooters would help them to become elite shooters
Thomas O, Sunehag P, Dror G, Yun S, Kim S, Robards M, Smola A, Green D, Saunders P	Wearable sensor activity analysis using semi-Markov models with a grammar	10.1016/J.pmcj.2010.01.002	2010	Pervasive and Mobile Computing	swimming	front crawl, breaststroke, butterfly, backstroke, turns (three 8-lap training sessions)	to segment and label swimming sessions using semi-Markov model	recruited from Australian Institute of Sport	3F	in field	#	activity recognition	1D accelerometer	MinimaxX (Catapult)	NS	100	1B	pelvis	special pocket in the swim suit	#	method for sports activity recognition that generalizes well and produce high accuracy predictions
Thompson CJ, Bemben MG	Reliability and comparability of the accelerometer as a measure of muscular power	10.1097/00005768-199906000-00020	1999	Medicine and Science in Sports and Exercise	overload training	bench press, one 1RM trial and three trials of 60% 1RM	to determine the effectiveness of using accelerometry as a reliable measure of upper body muscular power and its comparability with other conventional measurement tools	NS	30M	laboratory	#	power, force, velocity, bar displacement	1D accelerometer	custom-made 3145 (ICS Sensors)	NS	NS	1E	on the Smith Press machine	#	#	would function effectively as an independent tool to assess differences in muscular power between individuals, as well as to identify improvements or decrements in muscular power that occur as a result of a training program, injury, or other factors
Vales-Alonso J, Chaves-Diéguez D, López-Matencio P, Alcaraz JJ, Parrado-García FJ, González-Castaño FJ	SAETA: a smart coaching assistant for professional volleyball training	10.1109/TSMC.2015.2391258	2015	IEEE Transactions on Systems, Man, and Cybernetics: Systems	volleyball	training sessions	to present a novel AmI system for high-level team sport training that is based on supervised learning techniques and stochastic modeling	elite	NS	in field		intensity of the movement	3D accelerometer	Zephyr BioHarness (Zephyr technology)	NS	NS	1B	trunk	belt	heart rate monitor (Suunto t6d Black Smoke), wireless sensor node platform (Imote 2)	new AmI system SAETA was developed for professional team sport player training. In the technical-tactical training a supervised-learning module based on Markov Decision Processes computes the best configurations (activity and resting durations) for repetitional exercises. The quality module is able to detect player’s jumps and evaluate their intensity with respect to player’s history
Van Der Slikke RMA, Berger MAM, Bregman DJJ, Lagerberg AH, Veeger HEJ	Opportunities for measuring wheelchair kinematics in match settings; reliability of a three inertial sensor configuration	10.1016/j.jbiomech.2015.06.001	2015	Journal of Biomechanics	wheelchair basketball	21 agility field tests	to provide a reliable, robust and easily applicable system to measure wheelchair kinematics during matches	no experience recreational elite	10M, 1F 2M, 1F 5M, 1F	in field	#	displacement, speed, rotation, rotational speed and instantaneous rotation centre	3D accelerometer 3D gyroscope 3D magnetometer	x-IMU (x-ioTechnologies)	range = ± 8g range = ±2000 deg/s	256	1E	on the frame’s rear axis slightly right from the centre and on each wheel axis	NS	#	the IMU configuration showed to be, in most match like conditions, reliable for measuring wheelchair kinematics, once the developed skidding algorithms were applied, with low RMSE values and high correlations (ICC) to gold standard outcomes
van der Slikke RMA, Berger MAM, Bregman DJJ, Veeger HEJ	From big data to rich data: the key features of athlete wheelchair mobility performance	10.1016/j.jbiomech.2016.08.022	2016	Journal of Biomechanics	wheelchair basketball	whole match	to compose an easy to interpret display of key features best representing wheelchair mobility performance	national international	12M 8M,9F	competition	#	22 kinematic outcomes regarding linear and rotational movement then reduced to 6 key outcomes	3D accelerometer 3D gyroscope	X-IO Technologies	NS	NS	3E	one on each rear wheel axis and one the the rear frame bar of the wheelchair	screwd on the wheelchair (see Fig. 1)	#	six key outcomes related to linear and rotational speed and acceleration; these outcomes discriminate well between wheelchair basketball athletes of different performance levels; classification appears to be a significant factor for discriminating, but it is not a similar factor in all competition levels; novel graphical display of the selected outcomes = radar plot with an axis for each outcome
Villaseñor A, Turcotte RA, Pearsall DJ	Recoil effect of the ice hockey stick during a slap shot	10.1123/jab.22.3.202	2006	Journal of Applied Biomechanics	ice hockey	slap shot	to examine the recoil effect of the ice hockey stick shaft during a stationary slap shot	elite recreational	4M 5M	NS	blade-puck contact time	puck velocity (other param from video analysis)	3D accelerometer	custom-made 8792A500 (Kistler)	range = ±500g; sensitivity = 10mV/g; shock tolerance = 1000g	10000	1E	center of the modified puck	embedded in the stick	high-speed video system (Motion Scope,RedLake Imaging, Model PCI 1000, fs 1000Hz)	the study of the dynamic response of the stick shaft and how it varies using different materials (wooden/composite) could have an impact on design, construction and material optimization
Vingren JL, Buddhadev HH, Hill DW	Smith machine counterbalance system affects measures of maximal bench press throw performance	10.1519/JSC.0b013e31821eb67f	2011	Journal of Strength and Conditioning Research	overload training	bench press throws	to determine the effect of using a counterbalance weight system on measures of smith machine bench press throw performance	untrained highly resistance trained	10M, 14 F	in field	#	peak velocity, peak force, peak power	1D accelerometer	Myotest	NS	NS	1E	barbell	clip on barbell		the sensor is only used to test for differences in the use of the smith machine. Mayotrest validated elsewhere?
Waldron M, Worsfold PR, Twist C, Lamb K	A three-season comparison of match performances among selected and unselected elite youth rugby league players	10.1080/02640414.2014.889838	2014	Journal of Sports Sciences	rugby	rugby training and competition	to compare the technical actions, movements, heart rates and perceptual responses of selected and unselected youth rugby league players during matches across a period of three seasons (under-15 to under-17 age groups)	sub-elite professional juniors U15 U16 U17	16 +5 13 +8 9 +3 (gender NS)	in field	playing interval (min)	total distance covered (m), relative distance covered (m· min−1), and both total and relative distance within six different speed categories (zones 1 to 6), frequency of sprints (n), mean sprint distance (m), sprints per minute (sprints · min−1), peak sprint distance (m) and peak sprint speed (km · h−1)	3D accelerometer	SPI-Pro (GPSports)	mass = 86g; dimensions = 8 × 4 × 2mm^3;	100	1B	between the scapulae	vest	Heart rate monitor (Polar Electro)	none of the match-related performance variables differentiated between these groups in both the under-15 and the under-17 age groups. However, within the under-16 age group, the selected players performed for longer average match periods compared to unselected players
Waldron M, Worsfold PR, Twist C, Lamb K	Concurrent validity and test-retest reliability of a global positioning system (GPS) and timing gates to assess sprint performance variables	10.1080/02640414.2011.608703.	2011	Journal of Sports Sciences	rugby	two maximal sprint efforts, starting from a standing position, separated by 3 min of passive recovery	a. to determine the concurrent validity and reliability of a GPS and timing gates to measure sprinting speed or distance b. to determine the reliability of proper accelerations recorded via GPS–accelerometer integration	elite youth league	19M	in field	#	speed, peak proper acceleration (g), and frequency of proper accelerations above 5 g over 10 m and 30 m	3D accelerometer	SPI-Pro (GPSports)	mass = 86g; dimensions = 90 x 45 x 5mm^3; range = ±6 g	100	1B	between the scapulae	GPS vest tightly fitted	GPS 5 Hz	accelerometer measurements were least reliable (CV¼4.69% to 5.16%), particularly for the frequency of proper accelerations (95% LOA¼1.00+5.43; CV¼14.12%)
Warlop TB, Bollens B, Crevecoeur F, Detrembleur C, Lejeune TM	Dynamics of revolution time variability in cycling pattern: voluntary intent can alter the long-range autocorrelations	10.1007/s10439-013-0834-2	2013	Annals of Biomedical Engineering	cycling	two successive 10 min sessions of cycling at a constant resistance of 10 N (or 1 Kp): 1. cadence was freely chosen by the subjects 2. subjects were invited to maintain a cadence of 60 revolutions per minute (rpm)	a. to investigate the presence of long-range autocorrelations in the cycling pattern b. to test the influence of a volitional control of a pre-determined cadence on the long-range interdependency characterizing rhythmic motor tasks	healthy young regular sportspersons	15M	laboratory	#	revolution time (standart deviation, coeficcient of variation, parameters obtained from the power spectral density)	3D accelerometer 3D gyroscope	NS	NS	512	2B	antero-posterior direction on the head of the right fibula	taped	#	presence of long-range autocorrelations among the revolution time variability in cycling pattern of young healthy men + differences highlighted in longrange autocorrelations during constrained condition suggest that they can be altered by a centrally mediated process
Watanabe K, Hokari M	Kinematical analysis and measurement of sports form	10.1109/TSMCA.2005.855777	2006	IEEE Transactions on Systems, Man, and Cybernetics: Systems	golf	golf-driver-swing	to describe a method for measuring variables related to sport forms, especially golf-swing forms, including complex and high-speed motions	novice mid-level golfers	1M 1M	laboratory	#	estimated waist, shoulder and head trajectories and angular positions with respect to anatomical planes	3D gyroscope	custom-made ENC-03J (Murata)	mass = 2.7g; dimensions = 22 × 9 × 8mm^3;	NS	12B	LR knees and thighs, hip, waist, upper back, shoulder, head, L upper arm, L forearm, R arm	adjustable holder	microphone (impact) and high-speed camera (2000 frames/s)	#
Watari R, Hettinga B, Osis S, Ferber R	Validation of a torso-mounted accelerometer for measures of vertical oscillation and ground contact time during treadmill running	10.1123/jab.2015-0200	2016	Journal of Applied Biomechanics	running	running on an instrumented treadmill at 5 different speeds	to test the validity of measures of vertical oscillation (VO) and ground contact time (GCT) derived from a commercially-available torso-mounted accelerometer device	semi-elite	14M, 8F	laboratory	ground contact time	vertical oscillation of the center of mass	accelerometer	Forerunner 620 (Garmin)	NS	NS	1B	on the torso, near the xiphoid process of the sternum	strap with 2 metal snap buttons, and a double-face adhesive tape applied to the back of the equipment to improve fixation to the participant's skin	#	the device is a viable alternative to expensive, specialized equipment for measuring certain biomechanical variables in the field. However, the measures provided by the device for torso-segment vertical oscillation yield systematic overestimations of CoM vertical displacement when compared with the gold standard kinetic method. Measures of GCT by the device present very good agreement with the ki…
Weaving D, Marshall P, Earle K, Nevill A, Abt G	Combining internal- and external-training-load measures in professional rugby league	10.1123/ijspp.2013-0444	2014	International Journal of Sports Physiology and Performance	rugby	training	to examine the influence of training mode on common measures of training load in professional rugby league players	elite league	17M	in field	#	magnitude of impacts	3D accelerometer	SPI Pro XII (GPSports)	NS	100	NS	NS	NS	Borg CR-10 scale, Heart rate, GPS 5 Hz	the current study has shown that for skills, speed, wrestle, and strongman training there was more than 1 principal component identified, suggesting that a combination of both internal and external training-load measures is required to maximize the variance explained. During small-sided games and conditioning there was only a single principal component identified, which suggests that training-loa…
Wellman AD, Coad SC, Goulet GC, Mclellan CP	Quantification of competitive game demands of NCAA division I college football players using global positioning systems	10.1519/JSC.0000000000001206	2016	Journal of Strength and Conditioning Research	American football	12 matches	to examine the competitive physiological movement demands of National Collegiate Athletic Association (NCAA) Division I college football players using portable global positioning system (GPS) technology during games and to examine positional groups within offensive and defensive teams, to determine if a player's physiological requirements during games are influenced by playing position	NCAA Division I	33M	competition	#	frequency and magnitude of full-body acceleration	3D accelerometer	SPI HPU (GPSports)	mass = 66 g: dimensions = 74 x 42 x16 mm^3	100	1B	in the center of the upper back, slightly superior to the scapulae	placed in a custom-designed pocket attached to the shoulder pads of the subjects, which were custom-fit for each individual, to minimize their movement	GPS 15 Hz (SPI HPU; GPSports, Canberra, Australia)	wearable devices allow to characterize positional groups within offensive and defensive teams, to determine if a player’s physiological requirements during games are influenced by playing position
Weyand PG, Kelly M, Blackadar T, Darley JC, Oliver SR, Ohlenbusch NE, Joffe SW, Hoyt RW	Ambulatory estimates of maximal aerobic power from foot-ground contact times and heart rates in running humans	#	2001	Journal of Applied Physiology	running (distance running)	treadmill running	to estimate of maximal aerobic power contact time and HR	from low active (20min, 2 per week) to competitive distance runners	18M, 18F	laboratory	contact times	#	2D accelerometer	custom-made ADXL210 (Analog Devices)	range = 0-10g	NS	2E	top of the shoes	shoe laces	gas analyzer, heart rate monitor for vo2, aerobic fitness index (1/tc*heart rate)	simultaneous measurements of foot-ground constant times and heart rates during level running at a freely chosen constant speed can provide accurate estimates of maximal aerobic power
White A, Macfarlane N	Analysis of international competition and training in men's field hockey by global positioning system and inertial sensor technology	10.1519/jsc.0000000000000600	2015	Journal of strength and Conditioning Research	field hockey	training and competition	to assess the physiological demands of elite field hockey during competition and training with data expressed relative to the available “active” time	elite	16M	competition	#	PlayerLoad (3D jerk) speed zones	3D accelerometer	MinimaxX (Catapult)	NS	NS	1B	between the shoulder blades	with neoprene pouch		training duration was longer than competition and covered a greater total distance. The distance covered sprinting and running at high intensity was not different between training and competition. International players can replicate the intensity of competition during smallsided games
Winter S, Lee J, Leadbetter R, Gordon S	Validation of a single inertial sensor for measuring running kinematics overground during a prolonged run	#	2016	Journal of Fitness Research	running	8 km run on a treadmill (gradient at 1%), with an overgound run at beginning, end and every each 2km	a. compare acceleration data collected using an inertial sensor with a laboratory motion analysis system in overground running during a prolonged run b.determine whether specific events in the running gait cycle (heel strike and toe off) were identified consistently by both data collection methods	recreational	6M, 4F	laboratory	heel strike and toe off	acceleration data	3D accelerometer	system presented in Davey et al 2008	mass = 21g; dimensions = 52 x 33 x 10mm^3; range = ±8g	100	1B	lower back	adhered using double-sided tape directly to the skin of the runner’s low back, and secured with an elastic bandage that was wrapped over the sensor and around the waist	#	A single inertial sensor placed on the low back can be used to assess three-dimensional acceleration data during prolonged overground running, thus allowing running performance assessment under fatigue conditions
Wixted A, Portus M, Spratford W, James D	Detection of throwing in cricket using wearable sensors	10.1080/19346182.2012.725409	2011	Sports Technology	cricket	throwing	to assess legal/illegal bowling action	experienced	2 (gender NS)	in field	#	classification of legal/illegal action	3D accelerometer 3D gyroscope	custom-made	range = ± 16g; range = ±2000deg/s	200	2B	outside of the elbow, when fully flexed with the flex-PBC slightly bent	double-sided tape, covered with adhesive bandage	#	IMUs can help detecting illegal actions
Wixted AJ, Billing DC, James DA	Validation of trunk mounted inertial sensors for analysing running biomechanics under field conditions, using synchronously collected foot contact data	10.1007/s12283-010-0043-2	2010	Sports Engineering	running (distance running)	1500m simulated race	to analyse distance running using IMUs	elite	2M	in field	step frequency	#	2D accelerometer	NS	range = ±2g	500	2B	side by side over the L3–L4 inter-vertebral space	NS	#	#
Wright BV, Stager JM	Quantifying competitive swim training using accelerometer-based activity monitors	10.1007/s12283-013-0123-1	2013	Sports Engineering	swimming	front crawl at moderate speed (800,400,200,100, and 50m), and progressive intensity (50m)	to examine commercial accelerometers ability to track and quantify swim training variables: speed and distance	college	33M, 20F 10 (to cross validate)	in field	stroke count	mean speed, distance predicted from stroke count	3D accelerometer 3D gyroscope 3D magnetometer	Philips	mass = 16g (34g when attached to watch strap); dimensions = 29 x 37 x 11 mm^3	32	8B	right wirst and ankle	watch strap	#	commercially availabe accelerometer-based activity monitors have the ability to reasonably estiate distance and speed in competitive swimmers
Wundersitz DW, Josman C, Gupta R, Netto KJ, Gastin PB, Robertson S	Classification of team sport activities using a single wearable tracking device	10.1016/j.jbiomech.2015.09.015	2015	Journal of Biomechanics	contact-based team sports	stationary, walking, jogging, sprinting, changing direction, counter-movement jumping, jumping for distance, and tackling activities	to determine whether data obtained from a single wearable tracking device can be used to classify team sport-related activities	recreational	76M	in field	#	7 time- and 2 frequency-domain features and energy of the signal	3D accelerometer 3D gyroscope	MinimaxX S4 (Catapult)	NS	100	1B	below the neck (on the upper trunk), in-line and dorsal to the first to fifth thoracic vertebrae of the spine	worn in a tightly fitted manufacturer supplied sports vest	#	#
Wundersitz DWT, Gastin PB, Richter C, Robertson SJ, Netto KJ	Validity of a trunk-mounted accelerometer to assess peak accelerations during walking, jogging and running	10.1080/17461391.2014.955131	2015	European Journal of Sport Science	running	walking, jogging and running	a. to compare peak acceleration data from an accelerometer contained within a wearable tracking device with a criterion measure of acceleration, derived from a MA system, while walking, jogging and running b.to investigate the effect different filtering cut-off frequencies have on accelerometer accuracy, agreement, precision and relative error	recreational	28M, 11F	laboratory	#	peak accelerations	3D accelerometer 3D gyroscope 3D magnetometer	MinimaxX S4 (Catapult)	mass = 67g; dimensions = 88 × 50 × 19mm^3	100	1B	upper trunk	the device was worn in a tightly fitted manufacturer-supplied harness, similar to a compression sports top	#	the accuracy, agreement, precision and relative error statistics combined support the use of the accelerometer for in-field monitoring of peak accelerations during walking, jogging and to a lesser degree running. Practically, to enhance the accuracy of the accelerometer data produced, wearable tracking device manufacturers should consider incorporating a 10 Hz filtering algorithm within the devic…
Wundersitz DWT, Gastin PB, Robertson S, Davey PC, Netto KJ	Validation of a trunk-mounted accelerometer to measure peak impacts during team sport movements	10.1055/s-0035-1547265	2015	International Journal of Sports Medicine	team sports	a circuit including the following movements (in order): 3 double-leg (DL) jumps, a jog, 3 changes of direction (COD), 2 single-leg (SL) jumps for distance, a sprint, a walk, and a tackle bag to be taken to ground with maximum force	to assess the validity of an accelerometer to measure impacts in team sports	recreational	76M	laboratory	#	peak accelerations	3D accelerometer 3D gyroscope 3D magnetometer	MinimaxX S4 (Catapult)	mass = 67g; dimensions = 88 × 50 × 19mm^3	100	1B	NS	NS	36-camera MA system (Raptor-E, Motion Analysis Corporation, USA)	wearable tracking devices demonstrated an acceptable level of concurrent validity, so their use is suggested to measure peak impacts in team sports. Further, caution is advised when interpreting raw accelerometer data, with the output likely to overestimate movement intensity. Detailed analysis of accelerometer data may help practitioners better understand the physical demands imposed on athletes…
Wunsch T	Effects of a structured midsole on spatio-temporal variables and running economy in overground running.	10.1080/17461391.2016.1253776	2017	European Journal of Sport Science	running	overground running	to investigate whether leaf-spring structured midsole shoes alter spatiotemporal parameters and running economy in overground running	recreationally trained	10M	in field	stride length, stride rate	VO2max, caloric unit cost, lactate	NS	IMU (Humotion)	dimensions = 60 x 18 x 6mm^3; range = 5g	400	1B	abobe the right ankle joint	NS	metabolimeter (K4b2 Cosmed) high frequency camera (50Hz)	structural changes in midsole have the potential to produce small changes in spatiotemporal parameters during running and are correlated to running economy
Yang S, Mohr C, Li Q	Ambulatory running speed estimation using an inertial sensor	10.1016/j.gaitpost.2011.06.019	2011	Gait & Posture	running	running on a treadmill (5 different speeds: 2.5m/s, 2.75m/s, 3.0m/s, 3.25m/s,3.5m/s	to explore the feasibility of an inertial measurement unit in estimating running speed	NS	4M, 3F	laboratory	#	average shank speed, stride length	3D accelerometer 3D gyroscope	Inertia-Link (MicroStrain)	range = ± 5g; range = ± 600deg/s	NS	1B	midpoint of the right shank on the lateral side	NS	#	the proposed method slightly underestimated the running speed and presented some inter-subject, as well as stride-to-stride variability
Yiou E, Do MC	In a complex sequential movement, what component of the motor program is improved with intensive practice, sequence timing or ensemble motor learning?	10.1007/s002210000624	2001	Experimental Brain Research	fencing	lunge; touche; lunge+touche	to investigate whether the higher maximum speed of complex athletic movements attained by experts compared with novices might solely be ascribed to the acquisition of a more efficient timing of the initiation of the simple movements that comprise complex sporting gestures	novice expert	6M 5M	laboratory	#	speed of the foil	1D accelerometer	Entran (StrainSense)	range = ±5g	1000	2E	on the hand-guard of the foil (AP direction); on the vertical bar supporting the target to detect time of hit of the foil	NS	EMG (deltoid muscles) large force platform, described by Brenière et al. 1981 (foot-off, displacement of the centre of foot pressure, body CoM acceleration)	the effect of intensive practice of a sport on the speed performance of a complex athletic gesture cannot solely be ascribed to the acquisition of a more efficient spontaneous timing of initiation of the simple movements composing the complex gesture; the results of the study also emphasise the method of training to inhibit the negative effects of the refractory period
Zhang Y, Chen K, Yi J	Rider trunk and bicycle pose estimation with fusion of force/inertial sensors	10.1109/TBME.2013.2260339	2013	IEEE Transactions on Biomedical Engineering	bike	indoor (riding the bicycle for a circular trajectory), outdoor (riding arbitrarily in an area 50mX40m)	to propose a computational scheme to estimate both the rider trunk pose and the bibycle roll angle using only intertial and force sensors	experienced	4M, 1F	in field	#	rider trunk pose and bibycle roll angle	3D accelerometer 3D gyroscope	605 (Motion Sense)	NS	50	1B, 2E	T6 on the back and on the bicycle	T-shape fixture	force/torque sensor (JR3 inc.), three load cell, optical encoder and a set of strain gauges	extended Kalman filter-based sensor fusion design fully incorporates the dynamic effects ot the force measurements. The performance is demonstrated through extensive indoor and outdoor riding experiments
Zhang YH, Chen K, Yi J, Liu T, Pan Q	Whole-body pose estimation in human bicycle riding using a small set of wearable sensors	10.1109/TMECH.2015.2490118	2016	IEEE/ASME Transactions on Mechatronics	cycling	a. laboratory: the subjects can only ride the bicycle for a circular trajectory (with radius around 2.5 m and a speed around 1 m/s) to keep balancing b. in field: the subjects arbitrarily rode the bicycle in an area of a size of 50×40 m2 with speeds ranging from 0.5 to 6 m/s	to estimate the human wholebody pose with application to bicycle riding using a small set of wearable sensors	experienced	4M, 1F	in field	#	3D whole-body pose of the rider-bicycle system	3D accelerometer 3D gyroscope	Motion Sense Inc.	2 IMU: acc: resolution < 0.08mg gyro: resolution < 0.007deg/s 4 gyros: resolution < 0.1deg/s (see Table 1 for info about Bias and Noise density)	100	5B, 1E	One IMU unit is mounted to the bicycle frame and the other one is rigidly attached to a T-shape fixture on the back of the rider’s trunk. Four small gyroscopes are attached on the left and right upper arms, the left and right thighs, respectively	NS	#	the use of inertial sensors provided direct motionsensitive measurements and the use of the geometric and physical rider-bicycle interaction constraints helped to reduce the integration drifts of the inertial sensor signals and the number of wearable sensors to obtain the whole- body pose information
Zhao Y, Gerhard D, Barden J	Periodicity-based swimming performance feature extraction and parameter estimation	10.1007/s12283-015-0178-2	2015	Sports Engineering	swimming	front crawl (25m laps)	to present a review of existing stroke parameter extraction methods, as well as a discussion of our new method in detail, continuing with a presentation of the experiments we performed to verify our new method, and the results of these experiments	elite	3M, 4F	in field	lap count, stroke count (per lap) and average stroke rate (per lap)	#	3D accelerometer	GENEActiv	NS	60	1B	lower back and wrist	straps	#	compared with the zero-crossing or peak detection approaches in which multiple axis, specific cut-off frequencies have to be selected for filtering, followed by the prescription of additional thresholds for stroke detection, the periodicitybased approach presented here is superior both in terms of accuracy and simplicity
Zihajehzadeh S, Loh D, Lee TJ, Hoskinson R, Park EJ	A cascaded Kalman filter-based GPS/MEMS-IMU integration for sports applications	10.1016/j.measurement.2015.05.023	2015	Measurements	snowboarding	nine downhill snowboarding runs	to develop a Kalman filter for GPS/MEMS-IMU integration for the purpose of trajectory determination in sports applications	healthy university students	3M	in field	#	trunk orientation, centre of mass velocity and position	3D accelerometer 3D gyroscope 3D magnetometer	Mti-G-700 (Xsens)	NS	100	1B	backpack	tape on aluminum frame inserted in the backpack	GPS 1 Hz (Novatel SPAN)	results of the field experiments reveal that the proposed algorithm is computationally much faster compared to the available non-linear approaches and demonstrates improved trajectory tracking during GPS outages
Zorko M, Nemec B, Babic J, Lešnik B, Supej M	The waist width of skis influences the kinematics of the knee joint in alpine skiing	#	2015	Journal of Sports Science and Medicine	alpine skiing	ten turns on a predefined course (similar to a giant slalom course)	to determine the knee joint kinematics during turning while using skis of different waist widths (65mm, 88mm, 110mm)	professional (highly skilled)	6 (gender NS)	in field	#	knee joint kinematics	3D accelerometer 3D gyroscope 3D magnetometer	MVB Bioimech v3.4.1 (Xsens)	NS	120	NS	NS	straps	Real Time Kinematics Global Navigation Sattelite systems, high-frequency camera	using skis with large waist widths on hard, frozen surfaces could bring the knee joint unfavorably closer to the end of the range of motion in transversal and frontal planes as well as potentially increasing the risk of degenerative knee injuries. However, the skiing equipment used can still significantly influence the movement strategy

## Sheet: Title page
TRENDS SUPPORTING THE IN-FIELD USE OF WEARABLE INERTIAL SENSORS FOR SPORT PERFORMANCE EVALUATION: A SYSTEMATIC REVIEW
Camomilla V. 1,2, Bergamini E. 1,2, Fantozzi S. 3,4, Vannozzi G. 1,2
1 Interuniversity Centre of Bioengineering of the Human Neuromusculoskeletal System (BOHNES), University of Rome “Foro Italico”, Piazza L. De Bosis 6, 00135 Rome, Italy
2 Department of Movement, Human and Health Sciences, University of Rome “Foro Italico”, Piazza L. De Bosis 6, 00135 Rome, Italy
3 Department of Electrical, Electronic, and Information Engineering “Guglielmo Marconi”, University of Bologna, Viale Risorgimento 2, 40136 Bologna, Italy
4 Health Sciences and Technologies - Interdepartmental Centre for Industrial Research, University of Bologna, Viale Risorgimento 2, 40136 Bologna, Italy
Corresponding author:
Valentina Camomilla
E-mail: valentina.camomilla@uniroma4.it
